# Supplementary material for: Health data ecosystem in Pakistan: a multisectoral qualitative assessment of needs and opportunities
Source: PubMed Central journal article supplement (PMC10514666; doi:10.1136/bmjopen-2023-071616), 2023-09-21
Supplement: bmjopen-2023-071616.draft_revisions.pdf [file bmjopen-2023-071616.draft_revisions.pdf]

# BMJ Open

BMJ Open is committed to open peer review. As part of this commitment we make the peer review history of every article we publish publicly available.

When an article is published we post the peer reviewers' comments and the authors' responses online. We also post the versions of the paper that were used during peer review. These are the versions that the peer review comments apply to.

The versions of the paper that follow are the versions that were submitted during the peer review process. They are not the versions of record or the final published versions. They should not be cited or distributed as the published version of this manuscript.

BMJ Open is an open access journal and the full, final, typeset and author-corrected version of record of the manuscript is available on our site with no access controls, subscription charges or pay-per-view fees (<http://bmjopen.bmj.com>).

If you have any questions on BMJ Open's open peer review process please email [info.bmjopen@bmj.com](mailto:info.bmjopen@bmj.com)

# BMJ Open

## Health Data Ecosystem in Pakistan – a multi-sectoral qualitative assessment of needs and opportunities

|                               |                                                                                                                                                                                                                                                                                                                                                                                                                                                                                                                                                                                                                                                                                                                                                                                                                                                                                                                                                                                                                                |
|-------------------------------|--------------------------------------------------------------------------------------------------------------------------------------------------------------------------------------------------------------------------------------------------------------------------------------------------------------------------------------------------------------------------------------------------------------------------------------------------------------------------------------------------------------------------------------------------------------------------------------------------------------------------------------------------------------------------------------------------------------------------------------------------------------------------------------------------------------------------------------------------------------------------------------------------------------------------------------------------------------------------------------------------------------------------------|
| Journal:                      | <i>BMJ Open</i>                                                                                                                                                                                                                                                                                                                                                                                                                                                                                                                                                                                                                                                                                                                                                                                                                                                                                                                                                                                                                |
| Manuscript ID                 | bmjopen-2023-071616                                                                                                                                                                                                                                                                                                                                                                                                                                                                                                                                                                                                                                                                                                                                                                                                                                                                                                                                                                                                            |
| Article Type:                 | Original research                                                                                                                                                                                                                                                                                                                                                                                                                                                                                                                                                                                                                                                                                                                                                                                                                                                                                                                                                                                                              |
| Date Submitted by the Author: | 09-Jan-2023                                                                                                                                                                                                                                                                                                                                                                                                                                                                                                                                                                                                                                                                                                                                                                                                                                                                                                                                                                                                                    |
| Complete List of Authors:     | <p>Mahmood, Sana; Aga Khan University; Aga Khan University, Department of Community Health Sciences<br/>         Noorali, Ali Aahil; The Aga Khan University<br/>         Manji, Afshan; Aga Khan University, Department of Medicine; Aga Khan University<br/>         Abbas, Saadia; Aga Khan University, Department of Medicine<br/>         Qamar, Javeria Bilal; Aga Khan University, Department of Medicine<br/>         Afzal, Noreen; The Aga Khan University<br/>         Siddiqi, Sameen; Aga Khan University Medical College Pakistan, Community Health Sciences Department<br/>         Hoodbhoy, Zahra; Aga Khan University, Department of Pediatrics and Child Health<br/>         Virani, Salim; Michael E. DeBakey Veterans Affairs Medical Center HSR&amp;D, Health Policy, Quality &amp; Informatics Program,<br/>         Bhutta, Zulfiqar; Hosp Sick Children, Centre for Global Child Health<br/>         Samad, Zainab; Aga Khan University; Duke Clinical Research Institute, Department of Medicine</p> |
| Keywords:                     | QUALITATIVE RESEARCH, PUBLIC HEALTH, Quality in health care < HEALTH SERVICES ADMINISTRATION & MANAGEMENT                                                                                                                                                                                                                                                                                                                                                                                                                                                                                                                                                                                                                                                                                                                                                                                                                                                                                                                      |
|                               |                                                                                                                                                                                                                                                                                                                                                                                                                                                                                                                                                                                                                                                                                                                                                                                                                                                                                                                                                                                                                                |

SCHOLARONE™  
Manuscripts

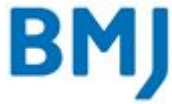

I, the Submitting Author has the right to grant and does grant on behalf of all authors of the Work (as defined in the below author licence), an exclusive licence and/or a non-exclusive licence for contributions from authors who are: i) UK Crown employees; ii) where BMJ has agreed a CC-BY licence shall apply, and/or iii) in accordance with the terms applicable for US Federal Government officers or employees acting as part of their official duties; on a worldwide, perpetual, irrevocable, royalty-free basis to BMJ Publishing Group Ltd ("BMJ") its licensees and where the relevant Journal is co-owned by BMJ to the co-owners of the Journal, to publish the Work in this journal and any other BMJ products and to exploit all rights, as set out in our [licence](#).

The Submitting Author accepts and understands that any supply made under these terms is made by BMJ to the Submitting Author unless you are acting as an employee on behalf of your employer or a postgraduate student of an affiliated institution which is paying any applicable article publishing charge ("APC") for Open Access articles. Where the Submitting Author wishes to make the Work available on an Open Access basis (and intends to pay the relevant APC), the terms of reuse of such Open Access shall be governed by a Creative Commons licence – details of these licences and which [Creative Commons](#) licence will apply to this Work are set out in our licence referred to above.

Other than as permitted in any relevant BMJ Author's Self Archiving Policies, I confirm this Work has not been accepted for publication elsewhere, is not being considered for publication elsewhere and does not duplicate material already published. I confirm all authors consent to publication of this Work and authorise the granting of this licence.

1  
2  
3 **Health Data Ecosystem in Pakistan – a multi-sectoral qualitative assessment of needs and**  
4 **opportunities**  
5  
6

7  
8 **Authors:** Sana Mahmood EdM <sup>1,2,3</sup>, Ali Aahil Noorali MBBS <sup>4,5</sup>, Afshan Manji MSc <sup>4,5</sup>, Saadia  
9  
10 Abbas <sup>4</sup>, Javeria Bilal Qamar <sup>4</sup>, Noreen Afzal MPhil <sup>1</sup>, Sameen Siddiqi DrMed <sup>2</sup>, Zahra  
11  
12 Hoodbhoy PhD<sup>6</sup>, Salim S. Virani PhD<sup>7</sup>, Zulfiqar A. Bhutta, PhD <sup>3</sup>, Zainab Samad MHS <sup>3,4,8</sup>  
13  
14

15  
16 **Affiliations:**  
17

18  
19 <sup>1</sup> Dean's Office, Medical College, Aga Khan University, Karachi, Pakistan  
20

21  
22 <sup>2</sup> Department of Community Health Sciences, Aga Khan University, Karachi, Pakistan  
23

24  
25 <sup>3</sup> Institute of Global Health and Development, Aga Khan University, Karachi, Pakistan  
26

27  
28 <sup>4</sup> Department of Medicine, Medical College, Aga Khan University, Karachi, Pakistan  
29

30  
31 <sup>5</sup> CITRIC Health Data Science Center, Medical College, Aga Khan University, Karachi, Pakistan  
32

33  
34 <sup>6</sup> Department of Pediatrics and Child Health, Aga Khan University, Karachi, Pakistan  
35

36  
37 <sup>7</sup> Division of Cardiology, Department of Medicine, Baylor College of Medicine, USA  
38

39  
40 <sup>8</sup> Division of Cardiology, Department of Medicine, Duke University, Duke Global Health  
41  
42 Institute, Duke Clinical Research Institute, Durham, NC  
43  
44

45 **Corresponding Author:**  
46

47  
48 Zainab Samad, MBBS, MHS  
49

50  
51 Aga Khan University, Stadium Road, Karachi, Pakistan, 74800  
52

53  
54 Email: [samad.zainab@aku.edu](mailto:samad.zainab@aku.edu)  
55

56  
57 Phone: 03002017196  
58

1  
2  
3  
4  
5  
6  
7  
8  
9  
10  
11  
12  
13  
14  
15  
16  
17  
18  
19  
20  
21  
22  
23  
24  
25  
26  
27  
28  
29  
30  
31  
32  
33  
34  
35  
36  
37  
38  
39  
40  
41  
42  
43  
44  
45  
46  
47  
48  
49  
50  
51  
52  
53  
54  
55  
56  
57  
58  
59  
60

**Word count:**

3508

For peer review only

## Abstract

### Objective:

Data are essential for tracking and monitoring of progress on health-related sustainable development goals (SDGs). But the capacity to analyze subnational and granular data is limited in low and middle-income countries. Through an exploratory qualitative approach, we aimed to understand the current landscape and perceptions around the health data ecosystem among key stakeholders in the healthcare and affiliated systems.

### Design:

An exploratory qualitative study design was employed.

### Setting:

This study was conducted at the Aga Khan University, Karachi, Pakistan.

### Participants:

We conducted semi-structured, in-depth interviews with multidisciplinary and multisectoral stakeholders from academia, hospital management, government, NGOs, and private entities till thematic saturation was achieved. Interviews were recorded and transcribed, followed by thematic analysis using NVivo.

### Results:

Thematic analysis of 15 in-depth interviews revealed five major themes: institutions are collecting data, but face barriers such as lack of structured data, data reliability and limited analytical ability for effective utilization of data; there is openness and enthusiasm for sharing data for advancing health; barriers to data sharing including accuracy, privacy and interoperability of data; gender information and health equity is not necessarily captured

1  
2  
3 routinely or deliberately ; and there is limited capacity in the area of both human capital and  
4  
5 infrastructure, for being able to use data to advance health.  
6

7  
8 **Conclusions:**  
9

10 Our study identified key areas of focus that can inform a national health data roadmap and  
11  
12 ecosystem in Pakistan.  
13  
14  
15  
16  
17  
18  
19  
20  
21  
22  
23  
24  
25  
26  
27  
28  
29  
30  
31  
32  
33  
34  
35  
36  
37  
38  
39  
40  
41  
42  
43  
44  
45  
46  
47  
48  
49  
50  
51  
52  
53  
54  
55  
56  
57  
58  
59  
60

For peer review only

### Strengths and limitations of this study

- Our study is the first, multi-disciplinary endeavor to understand perceptions on health data and health data science in Pakistan.
- We present perspectives from a low resource setting which has contextual relevancy and implications for other LMICs in the region.
- Our findings might not be generalizable to high income countries.



## Introduction

Data are essential for tracking and monitoring of progress on health-related sustainable development goals (SDGs). (1–3) While data and data analytics are being used in high income countries (HICs) to track human wellbeing, improve health equity, health outcomes, and continuously inform healthcare systems, their use in low middle income countries (LMICs) is lagging.(4–8) Several LMICs are trailing in their progress towards achievement of SDGs; leveraging data and data science methods could represent an important cost-effective opportunity for monitoring progress on health-related SDGs. (1,9–11)

With a 220 million population, Pakistan, the fifth most populous LMIC, has a high mortality and morbidity burden for various diseases; however, its health system and health information system capacity is nascent. (12,13) For example, a recent WHO survey report highlighted that only 40 % of births in Pakistan are registered. (14) Management of health systems and improving health outcomes in a large country like Pakistan will require organization and use of available health data and potentially novel digital data exhausts. (15)

During the COVID-19 pandemic, data were made nationally available in almost real-time, and data science methods were used to inform health policy and population level interventions such as smart lock downs and vaccinations efforts. (16,17) Multistakeholder and interprovincial collaboration underpinned this successful effort and highlighted that a national health data ecosystem should be developed outside of crisis situations.

To inform future efforts, an understanding of current perceptions and a mapping of national landscape is required on health data and health data science methods. To this end, we adopted a qualitative approach to understand the current landscape and perceptions on data in decision-making and health policy among a wide range of stakeholders.

## Methods

### Study Design and Setting:

This was an exploratory qualitative study with the primary objectives to comprehend the scope of health data science in Pakistan, the knowledge, and attitudes around developing partnerships and sharing data, and perceptions around the need for developing health data science capacity in Pakistan.

The study was led by investigators at the Aga Khan University (AKU), Karachi, Pakistan. With a forty-year presence in Pakistan, AKU has well established partnerships at both provincial and national levels, with government and academia, enabling regular engagement in interdisciplinary policy discussions and fora.

### Study instrument:

A semi-structured interview guide was designed using carefully curated questions (available in supplement 1). The guide prompted a detailed discussion on the landscape and scope of existing health data. Further discussion was rooted in potential facilitators and barriers to building a national health data collaborative that would contribute to improved health outcomes in Pakistan. This included understanding the nature of existing policies and collaboratives, availability and need of human capital for health data initiatives, and structures—from governance to infrastructure, which were present or would need to be developed and implemented to allow for organizations across sectors to comfortably share data to advance health outcomes in Pakistan. The guide was pilot tested among a diverse cohort of four individuals and judged for clarity of questions as well as face and content validity. Feedback from the pilot testing was incorporated to address gaps in the interview guide.

### **Data collection**

Interviews were conducted by two female investigators; ZS (MHS) and SM (Ed.M.), while research staff (AAN, AA, SA, JBQ) acted as observers. Standardization was maintained across all interviews by ensuring that the same two interviewers conducted all the interviews with the same guide. Both interviewers had prior experience of conducting qualitative interviews.

Participants were interviewed once. Each interview was conducted online for a duration that varied between 30 minutes and 2 hours.

### **Sampling, Inclusion and Exclusion Criteria:**

A scoping exercise was conducted to identify experts and relevant institutions. Through discussion, the investigators collectively identified key sectors in the health ecosystem of Pakistan for a landscape analysis which formed the inclusion criteria: 1. University and academia with faculty in health and/or information technology (IT), 2. Senior level hospital management (both private and public) 3. Government ministers (federal and provincial/state), 4. Non-governmental organizations (NGOs) and 5. Private-sector organizations (pharmaceuticals, finance). (Figure 1) There were no major or minor exclusion criteria.

Following convenience sampling to select key stakeholders, invites were forwarded via email, and interviews arranged in accordance with mutual availability. Thematic saturation was reached at 15 which comprised the final study sample.

### **Data Analysis:**

Grounded theory and the six-step method of thematic analysis of Braun and Clarke (2006) guided the analytical process. (18) Interviews were first audio recorded and transcribed verbatim.

1  
2  
3 Since the research staff were not only observers, but also transcribers for the interviews, these  
4 roles helped them get familiarized and immersed with the collected data. Transcripts were  
5  
6 imported into NVivo (version 12) and read line by line to inductively code the data. An initial  
7  
8 code book was developed by AAN and AM, which was refined through iteration and consensus  
9  
10 among research staff. This framework helped in standardization of codes applied in all  
11  
12 transcripts.  
13  
14

15  
16 Data coded under the framework were then grouped together based on similarities to identify  
17  
18 major themes, which were paired with direct verbatim quotations from the interviewees. The  
19  
20 themes were then reviewed to ensure adequate data and participant quotations supported the  
21  
22 creation of each theme. All themes were then defined to convey an adequate description of its  
23  
24 subthemes and relevant data. Lastly, the results were written in a format to describe the analyzed  
25  
26 data.  
27  
28  
29  
30  
31  
32

### 33 **Patient and Public Involvement**

34  
35 Patients and public were not involved in the research design, analysis and dissemination of the  
36  
37 findings.  
38  
39  
40  
41  
42

### 43 **Ethical Considerations:**

44  
45 The study received approval from the Ethical Review Committee at AKU (ERC # 2021-5839-  
46  
47 16883). Written informed consent over email for the study was obtained from each participant  
48  
49 before starting the interview.  
50  
51  
52  
53  
54  
55  
56  
57  
58  
59  
60

## Results

We conducted 15 in-depth interviews with a diverse range of stakeholders from five centralized cohorts. Demographic characteristics of the participants are described in table 1. (Figure 1).

Thematic analysis generated five overarching themes: 1. Institutions are collecting data, but face barriers of unstructured data, data reliability and limited analytical ability for effective utilization of data; 2. There is openness and enthusiasm for sharing data for advancing health; 3. Barriers to data sharing including accuracy, privacy and interoperability of data; 4. Gender information and health equity is not necessarily captured routinely or deliberately and 5. There is limited capacity in the area of both human capital and infrastructure, for being able to use data to advance health.

(Figure 2)

| <b>Table 1: Demographic characteristics of study participants (n=15)</b> |             |
|--------------------------------------------------------------------------|-------------|
| <b>Sector</b>                                                            | <b>n(%)</b> |
| Academia                                                                 | 1           |
| Hospitals                                                                | 2           |
| Government                                                               | 3           |
| Non-governmental organizations (NGOs)                                    | 3           |
| Private-sector organizations                                             | 6           |
|                                                                          |             |
| <b>Designation</b>                                                       |             |
| Mid-level management                                                     | 5           |
| Chief medical officer                                                    | 2           |
| Health minister                                                          | 2           |
| Senior management                                                        | 6           |

1  
2  
3 **Theme 1: Institutions are collecting data, but face barriers such as lack of structured data,**  
4 **data reliability and limited analytical ability for effective utilization of data**  
5  
6

7  
8 Experts communicated that there are several initiatives at the intersection of health and data, but  
9  
10 these exist in silos. Institutions have large volumes of operational data, but these datasets lack  
11  
12 structure and coherence, which impedes the ability to gauge actionable insights from it. Most  
13  
14 participants shared the perception of a lack of an appropriately designed system to help collate  
15  
16 data to their most desired format. Many interviewees felt that where data did exist, there were  
17  
18 other obstacles like significant deficits in staffing and the inability to utilize the collected data.  
19  
20 The officials within the ministry of health stated that *“We find that getting population level*  
21  
22 *information is really difficult. And you can get this information, but it's not really formalized -*  
23  
24 *you just hear verbal estimates. So, in terms of planning, there is no common information base*  
25  
26 *that people have that is like the gold standard.”*  
27  
28

29  
30 This sentiment was shared by another expert in epidemiology at a tertiary care hospital, who  
31  
32 noted that: *“The reality was when I came in, I realized that the structure of the data being*  
33  
34 *collected, was not conducive to be pulled out, right, so we couldn't do any research.”*  
35  
36

37  
38 Some participants reported that sharing and dissemination of data with external stakeholders is  
39  
40 not always prioritized by many organizations. Although data are being rigorously collected, there  
41  
42 is a lack of clarity on how to share data and in what structure, which appears to be a bigger  
43  
44 barrier than missingness of data. An expert in digital health strategy noted *“I would think that the*  
45  
46 *dissemination of the data is a far bigger issue than the data holes being there. So, if you start*  
47  
48 *digging, you actually find data sets, but you see that no one is aware of them, even though a lot*  
49  
50 *of activity has happened”*. The structure of available data was cited as another barrier because of  
51  
52 a lack of electronic systems.  
53  
54  
55  
56  
57

1  
2  
3 Experts shared that even if the data exists, dissemination of data is always an issue because data  
4  
5 governance is a nascent field in Pakistan. The term governance is also used broadly by  
6  
7 interviewees that use it to refer to privacy and security of data as well as an overarching  
8  
9 governing structure to establish appropriate ownership of data. A premier bank entity leader  
10  
11 noted that this also holds true for other sectors of Pakistan, such as the well-resourced finance  
12  
13 sector, where one of the country's major banks is still working through the early stages of data  
14  
15 governance.  
16  
17  
18  
19  
20

## 21 **Theme 2: There is openness and enthusiasm for sharing data for advancing health**

22  
23 In light of a shared vision to improve health outcomes in Pakistan, leaders indicated overall  
24  
25 willingness to share data and partner for this common mission, expressing keen interest and  
26  
27 stating their openness to proposals and collaborations. A government leader observed: *"I think*  
28  
29 *we are open to proposals where, say, we make data in specific areas available."*  
30  
31

32  
33 Interestingly, an expert shared insights about ensuring that a shared collaborative keeps  
34  
35 'democracy of data' as a central guiding principle. An epidemiologist at a tertiary care hospital  
36  
37 noted *"I think there has to be democracy of data sharing within an organization because there's*  
38  
39 *no point hanging on to data, and not sharing it so that somebody can make use of it, and that is*  
40  
41 *one of the problems; people hang on to data as a good treasure that they cannot share with*  
42  
43 *anybody."*  
44  
45  
46  
47  
48

## 49 **Theme 3: Barriers to data sharing including accuracy, privacy and interoperability of data**

50  
51 Most experts shared that certain challenges and pertinent questions would need to be accounted  
52  
53 for to build a sustainable, shared, accessible data ecosystem. These include the validity and  
54  
55  
56  
57

1  
2  
3 accuracy of datasets themselves, privacy and regulatory framework around data sharing,  
4  
5 addressing systemic differences between different sectors and inadequate workforce and training.  
6

7 A manager and planning executive at a bank, noted: *“Some concerns in data sharing include*  
8 *who will own the data, what will be done with the data? Will the data remain valid or not, will*  
9 *transparency be maintained, privacy rules will be followed or not, ownership of the data? Where*  
10 *will data be used ultimately.”*  
11  
12

13  
14  
15  
16 Similarly, a chief medical officer at a tertiary hospital mentioned that: *“There needs to be a lot*  
17 *more structure put into data sharing, and by structure, what I mean is that rules and regulations*  
18 *(which need to be set up a priori). That will really give confidence to individual institutions and*  
19 *individuals who own that data - that their data is going to be used properly, reliably and*  
20 *honestly”.*  
21  
22  
23

24  
25  
26  
27 Interoperability of data sets was reported as a big challenge due to differences in dataset formats  
28  
29 across different institutions. This lack of interoperability is further pronounced when  
30  
31 complemented with differences in the approach of private vs public sectors and inpatient vs  
32  
33 outpatient data. A leader in healthcare administration stated that *“Record keeping is something*  
34 *that is very poor there. In-patient record keeping is there, but there is nothing for out-patients at*  
35 *all. Private sector does keep the record, but the public sector does not. But the private sector*  
36 *does not share that data at all.”*  
37  
38  
39  
40  
41  
42  
43  
44  
45  
46

#### 47 **Theme 4: Gender information and health equity is not necessarily captured routinely or** 48 **deliberately** 49

50  
51 Most participants noted that the gender and equity lens have not been widely considered, neither  
52  
53 during the collection and analysis of health data, nor in the design of research and data driven  
54  
55  
56  
57



1  
2  
3 initiatives. With regards to gender, a leader at a non-profit organization explained that:

4  
5 *“Disaggregated data by gender is probably a large problem nationally, particularly with*  
6  
7 *development indicators.”*

8  
9  
10 Equity is often overlooked in conversations around data, and when considered, the level of  
11  
12 commitment is inadequate. A governmental leader mentioned that: *“Unfortunately, I think equity*  
13  
14 *is more a function of conversations with development partners. And it does translate to some*  
15  
16 *commitment, but not the level of commitment that should be the case.”*

17  
18  
19  
20  
21 **Theme 5: There is limited capacity in the area of both human capital and infrastructure,**  
22  
23 **for being able to use data to advance health**

24  
25  
26 Participants remarked that data sharing through a collaborative, on its own, would also require  
27  
28 capacity-building, which currently presents a barrier to achieving a cohesive data sharing  
29  
30 initiative.

31  
32  
33 A manager at an NGO noted: *“The issue is not whether people are willing to share data. But*  
34  
35 *certain organizations, traditional non-profit ones for example, don’t have data teams or data*  
36  
37 *managers (because of cost budgetary constraints). So, I think that these organizations often*  
38  
39 *don’t have the capacity to manage data.”*

40  
41  
42 It was also mentioned that lack of capacity building was a barrier to successfully analyze and  
43  
44 evaluate data. A provincial healthcare leader noted: *“The main problem here is that we don’t*  
45  
46 *have an HR [human resource] there or a proper computerized system there to log in that data*  
47  
48 *and upload it. We have a lot of restrictions in the IT department.”* Similarly, a senior leader at a  
49  
50 tertiary care hospital mentioned: *“We have the data, but we don’t have the capacity and*  
51  
52 *capability to analyze it and make changes in healthcare.”*

1  
2  
3 A representative from a large public sector tertiary care hospital reported their initiative of data  
4 automation and the barriers associated with it:  
5

6  
7 *"We have begun an initiative at our hospital where we are starting to do automation of the data*  
8 *and that is happening ... That is also not working because our staffing there has been rejected so*  
9 *we are now trying to have a medical record system as an operative thing to see how the medical*  
10 *reforms will work."*  
11  
12

13  
14  
15  
16 An NGO leader described the process, components, and importance of building a data driven  
17 team – a cohesive unit of trained individuals that understands the application of data sciences to  
18 health. He stated: *"There are four skills that I think are really important in building out a data*  
19 *team that we found. One is data engineering, which is just someone who can query databases,*  
20 *particularly complex databases...Then, I think the next skill that we found really useful is*  
21 *analytics, which is how to develop dashboards. And that is a very easily trainable skill. So the*  
22 *third skill that's (commonly) not there is knowing what dashboard to make. And the fourth skill is*  
23 *data science, which is basically being able to model data and that's an even rarer skill especially*  
24 *locally."*  
25  
26  
27  
28  
29  
30  
31  
32  
33  
34  
35  
36  
37  
38  
39  
40  
41  
42  
43  
44  
45  
46  
47  
48  
49  
50  
51  
52  
53  
54  
55  
56  
57  
58  
59  
60

## Discussion

Our study is the first, multi-disciplinary endeavor to understand perceptions on health data and health data science in Pakistan. The main finding from our qualitative analysis is that the scope of data science in health for advancing health outcomes, is far-reaching in Pakistan and likely in other LMICs where organizations have collected a great deal of data but are in the early stages of understanding how best to leverage and utilize this data. Furthermore, there is potential for establishing a health data ecosystem comprised of a health data collaborative with an appropriate governance structure, and capacity building initiatives. Finally, gender and equity must be intentionally included in the design of any collaborative and is critical to developing a health data strategy that looks to advance health in Pakistan in an equitable manner.

Even though the far-reaching scope of health data and data science methods in healthcare and their potential benefits are recognized by developing countries, development of a national data collaborative that might serve as a foundational block of a larger health data ecosystem is a complex endeavor and presents some challenges. (11) A similar viewpoint was expressed by the participants in our study, who indicated that even though independent and national efforts are being made to allow for digitization and automation in healthcare, we as a country are at the very nascent stages of using data to progress a national health agenda. A principal lever for this agenda is timely access to the right information, but this has been a scarce resource in LMICs.

(19)

Lack of rigorous and structured systems, problems with accuracy, credibility and completeness, inadequacy of trained personnel with core competencies, and unavailability of analytic tools were core obstacles highlighted by experts. Furthermore, there are very limited efforts to

1  
2  
3 propagate a multimodal, multisectoral, and multidisciplinary approach to data, leading to a  
4  
5 conspicuous lack of a central repository of information in LMICs like Pakistan. (9) In line with  
6  
7 recent literature, a key concern highlighted by participants in data sharing was safeguarding their  
8  
9 privacy, confidentiality, and security, with all interviewees agreeing to the need of a governance  
10  
11 and regulatory framework being set up a priori to ensure data transparency and maintaining the  
12  
13 trust of all parties involved that their data will be used honestly and reliably. (9,20)  
14  
15

16  
17 Our participants also stated that the analysis, design, and collection of health data does not  
18  
19 currently support gender and equity lens as the core of any organization. Disaggregation of data  
20  
21 by gender is a problem nationally and is difficult to find. Literature suggests that health system  
22  
23 policy development does not always pay adequate attention to gender and even when policies do  
24  
25 include gender, intentions can evaporate when it comes to actual implementation. (21,22)  
26  
27

28  
29 Tannenbaum et al. and The World Bank note that gender data is a powerful tool for improving  
30  
31 lives as lack of disaggregated gender information has resulted in an incomplete disease  
32  
33 understanding.(23,24) Furthermore, gender equity is an integral component of social  
34  
35 responsibility and according to International Organization for Standardization (ISO) 26000  
36  
37 Sustainable Development Goal 5 (Guidance on Social Responsibility), whereby the standard  
38  
39 denotes the importance of having gender-inclusive leadership and governance in ensuring  
40  
41 elimination of gender bias and promotion of gender parity. (25)  
42  
43

44  
45 Our study participants emphasized that translation and evidence synthesis require significant  
46  
47 capacity building. Organizations collect and store data, have information management systems,  
48  
49 but that data is not being utilized in the most effective way, due to limited capacity and skillsets.

50  
51 A systematic review reflects on the importance of ongoing training and multilevel strategies  
52  
53 needed in development of such programs, and how capacity building can influence different  
54  
55

1  
2  
3 levels of entire organizations and systems. (26) The types of interventions assessed included  
4 internet-based teaching and workshops. The results of a worldwide cross-sectional survey by  
5 Kaggle et. al, illustrates the extent to which companies in various countries have adapted to  
6 machine learning models, with Israel surpassing even the United States. (27) Moreover, 21% of  
7 respondents' companies were exploring machine learning methods with the goal of putting a  
8 model into commercial use. A Global System for Mobile Communications report on artificial  
9 intelligence use in LMICs discusses the major barriers to big data science adoption for LMICs.  
10 (28) These include shortage of knowledge, skills and expertise, unreliable power generation,  
11 frequent power outages and fluctuations, lack of access to sufficient computing power, and  
12 unavailability or inaccessibility of quality data in LMICs, particularly in fragile or conflict  
13 affected contexts.

14  
15 A national strategy on developing a health data ecosystem and data collaborative for Pakistan  
16 necessitates that the gaps identified globally and in our qualitative interviews are bridged and  
17 data are put into action. In this regard, a national health digital framework has recently been  
18 developed by the Ministry of Health, which can be used for developing a large-scale roadmap  
19 and as a key tool for stakeholder engagement and buy in. As noted by the healthcare experts, the  
20 roadmap is to help healthcare professionals use data science principles to inform decision  
21 making, uplifting research, and guiding clinical approaches to improve healthcare delivery.  
22 (29,30)

23  
24 This study has a few limitations. Our findings might not be generalizable to high income  
25 countries. However, we present perspectives from a low resource setting which has contextual  
26 relevancy and implications for other LMICs in the region. Qualitative interviews focused on  
27 perspectives from key management leads at major institutions. This was primarily because the

1  
2  
3 scope and objectives of this exercise were to assimilate input from experts and leaders in  
4 management, policy, and healthcare. A next step, on establishing a health data collaborative,  
5 will be to ensure data and perspectives from patients and communities, who serve as a key  
6 stakeholder in healthcare systems.  
7  
8  
9  
10  
11  
12  
13

## 14 **Conclusion**

15  
16 This systematic approach to understanding the perceptions around the health data ecosystem in  
17 Pakistan highlighted important opportunities and barriers that need to be addressed to further  
18 develop a health ecosystem in Pakistan. Creation of appropriate governance, rules and  
19 regulations, gender and equity indicators are important principles to consider for planning any  
20 national health data collaborative. To enable this ecosystem, collaboration is required on  
21 strategic outlining of how data can be collated, organized, curated, updated, and finally  
22 pipelined. For achieving this goal, building data science capacity within organizations would be  
23 critical, thus providing the ability to leverage health data to its full potential for informed  
24 decision making.  
25  
26  
27  
28  
29  
30  
31  
32  
33  
34  
35  
36  
37  
38  
39  
40  
41  
42  
43  
44  
45  
46  
47  
48  
49  
50  
51  
52  
53  
54  
55  
56  
57  
58  
59  
60

## Contributors

All authors confirm that they had full access to all the data in the study and accept responsibility to submit for publication. ZM conceived of, designed the study and acquired funding. ZS and SM collected the data. SA, JQB were involved in data curation. AAN and AM analyzed and interpreted the data. ZM, SM, AAN, AM, and NA wrote the original draft of the manuscript. All authors contributed to reviewing and editing the manuscript.

## Patient and Public Involvement

Patients and public were not involved in the research design, analysis and dissemination of the findings.

## Declaration of interests

We declare no competing interests.

## Funding

This work was supported through a grant from the Bill & Melinda Gates Foundation (grant number: INV-021944).

## Data availability statement

No data are available.

## Ethics approval

The study received approval from the Ethical Review Committee at AKU (ERC # 2021-5839-16883).

## Licence statement

I, the Submitting Author has the right to grant and does grant on behalf of all authors of the Work (as defined in the below author licence), an exclusive licence and/or a non-exclusive licence for contributions from authors who are: i) UK Crown employees; ii) where BMJ has agreed a CC-BY licence shall apply, and/or iii) in accordance with the terms applicable for US Federal Government officers or employees acting as part of their official duties; on a worldwide, perpetual, irrevocable, royalty-free basis to BMJ Publishing Group Ltd (“BMJ”) its licensees and where the relevant Journal is co-owned by BMJ to the co-owners of the Journal, to publish the Work in BMJ Open and any other BMJ products and to exploit all rights, as set out in our licence.

The Submitting Author accepts and understands that any supply made under these terms is made by BMJ to the Submitting Author unless you are acting as an employee on behalf of your employer or a postgraduate student of an affiliated institution which is paying any applicable article publishing charge (“APC”) for Open Access articles. Where the Submitting Author wishes to make the Work available on an Open Access basis (and intends to pay the relevant APC), the terms of reuse of such Open Access shall be governed by a Creative Commons licence



1  
2  
3 – details of these licences and which Creative Commons licence will apply to this Work are set  
4  
5 out in our licence referred to above.  
6  
7

## 8 **References**

- 9  
10  
11 1. Measuring progress from 1990 to 2017 and projecting attainment to 2030 of the health-  
12 related Sustainable Development Goals for 195 countries and territories: a systematic  
13 analysis for the Global Burden of Disease Study 2017. *Lancet* (London, England). 2018  
14 Nov;392(10159):2091–138.  
15  
16  
17  
18  
19 2. Transforming our world: the 2030 Agenda for Sustainable Development | Department of  
20 Economic and Social Affairs [Internet]. [cited 2022 Nov 21]. Available from:  
21 <https://sdgs.un.org/2030agenda>  
22  
23  
24  
25  
26 3. Sachs JD, Schmidt-Traub G, Mazzucato M, Messner D, Nakicenovic N, Rockström J. Six  
27 Transformations to achieve the Sustainable Development Goals. *Nat Sustain* 2019 29  
28 [Internet]. 2019 Aug 26 [cited 2022 Nov 21];2(9):805–14. Available from:  
29 <https://www.nature.com/articles/s41893-019-0352-9>  
30  
31  
32  
33  
34  
35 4. Bhavnani SP, Muñoz D, Bagai A. Data Science in Healthcare: Implications for Early  
36 Career Investigators. *Circ Cardiovasc Qual Outcomes*. 2016 Nov;9(6):683–7.  
37  
38  
39  
40 5. Sharma A, Harrington RA, McClellan MB, Turakhia MP, Eapen ZJ, Steinhubl S, et al.  
41 Using Digital Health Technology to Better Generate Evidence and Deliver Evidence-  
42 Based Care. *J Am Coll Cardiol*. 2018 Jun;71(23):2680–90.  
43  
44  
45  
46  
47 6. Ting DSW, Carin L, Dzau V, Wong TY. Digital technology and COVID-19. *Nat Med*.  
48 2020 Apr;26(4):459–61.  
49  
50  
51 7. Imoto S, Hasegawa T, Yamaguchi R. Data science and precision health care. *Nutr Rev*.  
52 2020 Dec;78(12 Suppl 2):53–7.  
53  
54  
55  
56  
57  
58  
59  
60

- 1  
2  
3 8. Andreu-Perez J, Poon CCY, Merrifield RD, Wong STC, Yang GZ. Big data for health.  
4  
5 IEEE J Biomed Heal informatics. 2015 Jul;19(4):1193–208.  
6  
7
- 8 9. Bezuidenhout L, Chakauya E. Hidden concerns of sharing research data by low/middle-  
9  
10 income country scientists. *Glob Bioeth = Probl di Bioet*. 2018;29(1):39–54.  
11
- 12 10. Wyber R, Vaillancourt S, Perry W, Mannava P, Folaranmi T, Celi LA. Big data in global  
13  
14 health: improving health in low- and middle-income countries. *Bull World Health Organ*.  
15  
16 2015 Mar;93(3):203–8.  
17
- 18 11. Naseem M, Akhund R, Arshad H, Ibrahim MT. Exploring the Potential of Artificial  
19  
20 Intelligence and Machine Learning to Combat COVID-19 and Existing Opportunities for  
21  
22 LMIC: A Scoping Review. *J Prim Care Community Health*. 2020;11:2150132720963634.  
23
- 24 12. Brief on Census -2017 | Pakistan Bureau of Statistics [Internet]. [cited 2022 Nov 21].  
25  
26 Available from: <https://www.pbs.gov.pk/content/brief-census-2017>  
27
- 28 13. Roth GA, Abate D, Abate KH, Abay SM, Abbafati C, Abbasi N, et al. Global, regional,  
29  
30 and national age-sex-specific mortality for 282 causes of death in 195 countries and  
31  
32 territories, 1980–2017: a systematic analysis for the Global Burden of Disease Study  
33  
34 2017. *Lancet* [Internet]. 2018 Nov 10 [cited 2022 Nov 21];392(10159):1736–88.  
35  
36 Available from: <http://www.thelancet.com/article/S0140673618322037/fulltext>  
37
- 38 14. Civil registration and vital statistics (CRVS) - WHO [Internet]. [cited 2022 Nov 21].  
39  
40 Available from: [https://www.who.int/data/data-collection-tools/civil-registration-and-](https://www.who.int/data/data-collection-tools/civil-registration-and-vital-statistics-(crvs))  
41  
42 [vital-statistics-\(crvs\)](https://www.who.int/data/data-collection-tools/civil-registration-and-vital-statistics-(crvs))  
43  
44
- 45 15. Samad Z, Mahmood S, Siddiqui S, Bhutta ZA. Imagining a lean and agile digital health  
46  
47 ecosystem - a measure of pandemic responsiveness. *J Glob Health*. 2020  
48  
49 Dec;10(2):20391.  
50  
51  
52  
53  
54  
55  
56  
57

- 1  
2  
3 16. Akhtar H, Afridi M, Akhtar S, Ahmad H, Ali S, Khalid S, et al. Pakistan's Response to  
4 COVID-19: Overcoming National and International Hypes to Fight the Pandemic. JMIR  
5 Public Heal Surveill [Internet]. 2021 May 1 [cited 2022 Nov 21];7(5). Available from:  
6  
7  
8  
9  
10 [/pmc/articles/PMC8136406/](https://pubmed.ncbi.nlm.nih.gov/34386212/)  
11
- 12 17. Haq ZU, Mirza Z, Oyewale TO, Sultan F. Leaving no one behind: Pakistan's risk  
13 communication and community engagement during COVID-19. J Glob Health [Internet].  
14 2021 [cited 2022 Nov 21];11:1–5. Available from:  
15  
16  
17 <https://pubmed.ncbi.nlm.nih.gov/34386212/>  
18
- 19 18. Kiger ME, Varpio L. Thematic analysis of qualitative data: AMEE Guide No. 131. Med  
20 Teach [Internet]. 2020 Aug 2 [cited 2022 Nov 21];42(8):846–54. Available from:  
21  
22 <https://pubmed.ncbi.nlm.nih.gov/32356468/>  
23
- 24 19. Harrison K, Rahimi N, Danovaro-Holliday MC. Factors limiting data quality in the  
25 expanded programme on immunization in low and middle-income countries: A scoping  
26 review. Vaccine. 2020 Jun;38(30):4652–63.  
27
- 28 20. Tiffin N, George A, LeFevre AE. How to use relevant data for maximal benefit with  
29 minimal risk: digital health data governance to protect vulnerable populations in low-  
30 income and middle-income countries. BMJ Glob Heal. 2019;4(2):e001395.  
31  
32
- 33 21. Morgan R, Ayiasi RM, Barman D, Buzuzi S, Ssemugabo C, Ezumah N, et al. Gendered  
34 health systems: evidence from low- and middle-income countries. Heal Res policy Syst.  
35 2018 Jul;16(1):58.  
36  
37
- 38 22. Theobald S, Morgan R, Hawkins K, Ssali S, George A, Molyneux S. The importance of  
39 gender analysis in research for health systems strengthening. Vol. 32, Health policy and  
40 planning. 2017. p. v1–3.  
41  
42  
43  
44  
45  
46  
47  
48  
49  
50  
51  
52  
53  
54  
55  
56  
57

- 1  
2  
3 23. Tannenbaum C, Ellis RP, Eyssel F, Zou J, Schiebinger L. Sex and gender analysis  
4 improves science and engineering. *Nature*. 2019 Nov;575(7781):137–46.  
5  
6  
7  
8 24. More and Better Gender Data: A Powerful Tool for Improving Lives, The World Bank.  
9  
10 2016.  
11  
12 25. International Organization for Standardization 26000, Guidance on social responsibility.  
13  
14 26. DeCorby-Watson K, Mensah G, Bergeron K, Abdi S, Rempel B, Manson H. Effectiveness  
15 of capacity building interventions relevant to public health practice: a systematic review.  
16  
17 *BMC Public Health*. 2018 Jun;18(1):684.  
18  
19  
20  
21 27. Bob Hayes. Machine Learning Adoption Rates Around the World. Business Broadway.  
22  
23 2021.  
24  
25  
26 28. Artificial Intelligence and Start-Ups in Low- and Middle-Income Countries: Progress,  
27  
28 Promises and Perils. *Global System for Mobile Communications*. 2020.  
29  
30  
31 29. Bates DW, Saria S, Ohno-Machado L, Shah A, Escobar G. Big data in health care: using  
32  
33 analytics to identify and manage high-risk and high-cost patients. *Health Aff (Millwood)*.  
34  
35 2014 Jul;33(7):1123–31.  
36  
37  
38 30. Shaoibi A, Neelon B, Lenert LA. Shared Decision Making: From Decision Science to  
39  
40 Data Science. *Med Decis Mak an Int J Soc Med Decis Mak*. 2020 Apr;40(3):254–65.  
41  
42  
43  
44  
45  
46  
47  
48  
49  
50  
51  
52  
53  
54  
55  
56  
57  
58  
59  
60

1  
2  
3  
4  
5  
6  
7  
8  
9  
10  
11  
12  
13  
14  
15  
16  
17  
18  
19  
20  
21  
22  
23  
24  
25  
26  
27  
28  
29  
30  
31  
32  
33  
34  
35  
36  
37  
38  
39  
40  
41  
42  
43  
44  
45  
46  
47  
48  
49  
50  
51  
52  
53  
54  
55  
56  
57  
58  
59  
60

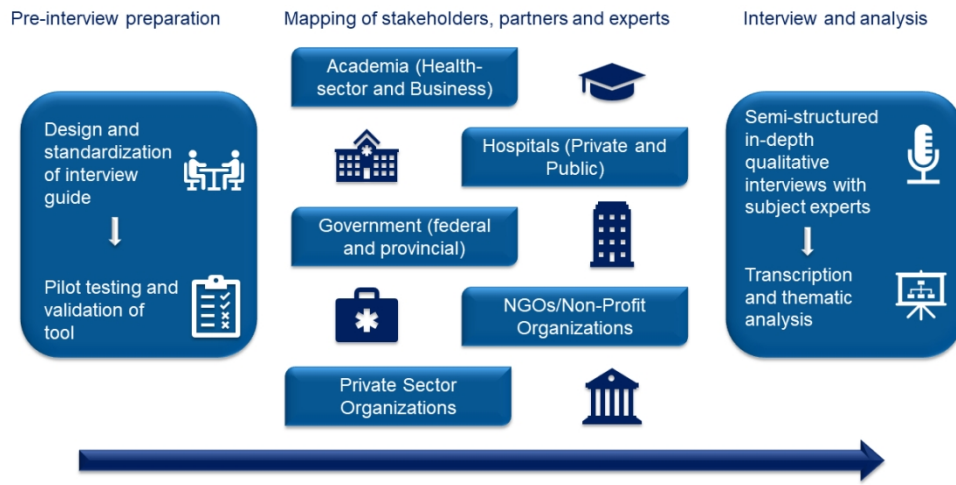

An overview of the methodological framework of the study – participant cohorts, process of interview preparation, conductance, and analysis

108x60mm (300 x 300 DPI)

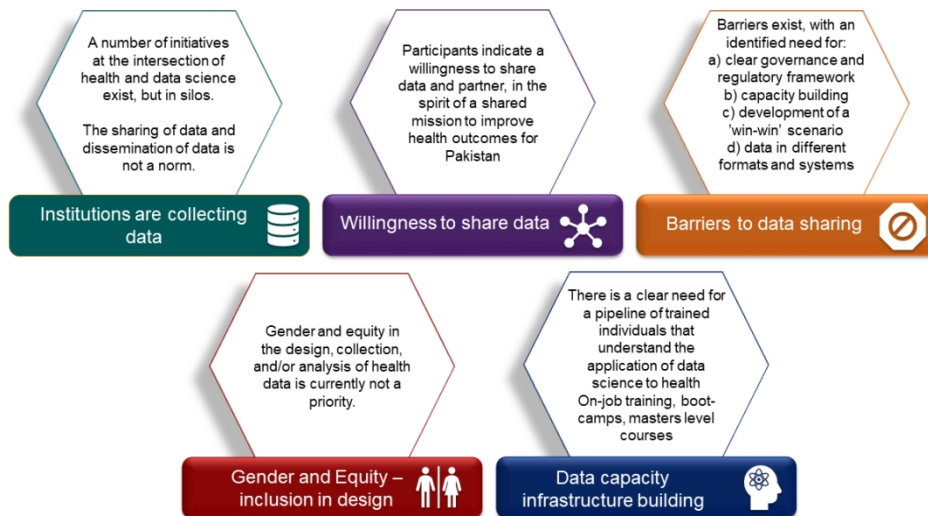

Key themes emerging from the thematic analysis and noteworthy takeaways

108x60mm (300 x 300 DPI)

## Semi-structured interview guide

### **Section 1 : Understanding the health data landscape for Pakistan**

#### **What type of health data exists in Pakistan?**

##### ***Potential prompts in case of a brief reply***

- What type of data at a national/regional/global level supports your decision-making ability/research work?
- What type of health data would further support your ability to make informed decisions?
- Is health data at a Pakistan level accessible?
- Is health data at a Pakistan level of good quality? (define quality)

### **Section 2: Understanding the application of a gender and equity lens to data**

#### ***Potential prompts in case of a brief reply (mostly guided by the interviewee's response)***

- Do we know how to apply a gender/equity lens to our data (disaggregation, analysis etc)
- What population group do you not frequently see available data about?

### **Section 3: Understanding the organizational handle on health data and its current role**

#### ***Potential prompts in case of a brief reply (mostly guided by the interviewee's response)***

- What health data does your organization hold and to what level does your organization engage with the data for decision making.
- How equipped are organizations to manage the health data they hold?
- What kind of infrastructure/software does your organization have? Is it sufficient?

### **Section 4: Understanding perceptions around developing a health data science training program/curriculum**

#### **How effective do you think the introduction of a health data science training curriculum will be, to address barriers?**

##### ***Potential prompts in case of a brief reply (mostly guided by the interviewee's response)***

- What type of training in data science would be most beneficial to you and why?
- What health data science curriculum/training programs exist and are useful?
- Do you think there's an existing need for development of such a program in Pakistan? Why or why not?
- What barriers should such a training program address?
- What components should the health data science training curriculum have?

1  
2  
3  
4  
5  
6  
7  
8  
9  
10  
11  
12  
13  
14  
15  
16  
17  
18  
19  
20  
21  
22  
23  
24  
25  
26  
27  
28  
29  
30  
31  
32  
33  
34  
35  
36  
37  
38  
39  
40  
41  
42  
43  
44  
45  
46  
47

### Consolidated criteria for reporting qualitative studies (COREQ): 32-item checklist

| No. Item                                       | Guide questions/description                                                                                                                 | Reported on Page # |
|------------------------------------------------|---------------------------------------------------------------------------------------------------------------------------------------------|--------------------|
| <b>Domain 1: Research team and reflexivity</b> |                                                                                                                                             |                    |
| <i>Personal Characteristics</i>                |                                                                                                                                             |                    |
| 1. Inter viewer/facilitator                    | Which author/s conducted the interview or focus group?                                                                                      | 8                  |
| 2. Credentials                                 | What were the researcher's credentials? E.g., PhD, MD                                                                                       | 8                  |
| 3. Occupation                                  | What was their occupation at the time of the study?                                                                                         | 8                  |
| 4. Gender                                      | Was the researcher male or female?                                                                                                          | 8                  |
| 5. Experience and training                     | What experience or training did the researcher have?                                                                                        | 8                  |
| <i>Relationship with participants</i>          |                                                                                                                                             |                    |
| 6. Relationship established                    | There was no personal relationship between interviewers                                                                                     | N/A                |
| 7. Participant knowledge of the interviewer    | What did the participants know about the researcher? e.g., personal goals, reasons for doing the research                                   | N/A                |
| 8. Interviewer characteristics                 | What characteristics were reported about the inter viewer/facilitator? e.g., Bias, assumptions, reasons and interests in the research topic | N/A                |
| <b>Domain 2: study design</b>                  |                                                                                                                                             |                    |
| <i>Theoretical framework</i>                   |                                                                                                                                             |                    |



|                                          |                                                                                                                                                           |     |
|------------------------------------------|-----------------------------------------------------------------------------------------------------------------------------------------------------------|-----|
|                                          |                                                                                                                                                           |     |
| 9. Methodological orientation and Theory | What methodological orientation was stated to underpin the study? e.g., grounded theory, discourse analysis, ethnography, phenomenology, content analysis | 8   |
| <i>Participant selection</i>             |                                                                                                                                                           |     |
| 10. Sampling                             | How were participants selected? e.g., purposive, convenience, consecutive, snowball                                                                       | 8   |
| 11. Method of approach                   | How were participants approached? e.g., face-to-face, telephone, mail, email                                                                              | 8   |
| 12. Sample size                          | How many participants were in the study?                                                                                                                  | 10  |
| 13. Non-participation                    | How many people refused to participate or dropped out? Reasons?                                                                                           | N/A |
| <i>Setting</i>                           |                                                                                                                                                           |     |
| 14. Setting of data collection           | Where was the data collected? e.g., home, clinic, workplace                                                                                               | 8   |
| 15. Presence of non-participants         | Was anyone else present besides the participants and researchers?                                                                                         | 8   |
| 16. Description of sample                | What are the important characteristics of the sample? e.g., demographic data, date                                                                        | 10  |
| <i>Data collection</i>                   |                                                                                                                                                           |     |
| 17. Interview guide                      | Were questions, prompts, guides provided by the authors? Was it pilot tested?                                                                             | 7   |
| 18. Repeat interviews                    | Were repeat inter views carried out? If yes, how many?                                                                                                    | 8   |
| 19. Audio/visual recording               | Did the research use audio or visual recording to collect the data?                                                                                       | 8   |

|                                        |                                                                                                                                     |       |
|----------------------------------------|-------------------------------------------------------------------------------------------------------------------------------------|-------|
| 20. Field notes                        | Were field notes made during and/or after the interview or focus group?                                                             | N/A   |
| 21. Duration                           | What was the duration of the inter views or focus group?                                                                            | 8     |
| 22. Data saturation                    | Was data saturation discussed?                                                                                                      | 8     |
| 23. Transcripts returned               | Were transcripts returned to participants for comment and/or correction?                                                            | N/A   |
| <b>Domain 3: analysis and findings</b> |                                                                                                                                     |       |
| <i>Data analysis</i>                   |                                                                                                                                     |       |
| 24. Number of data coders              | How many data coders coded the data?                                                                                                | 9     |
| 25. Description of the coding tree     | Did authors provide a description of the coding tree?                                                                               | N/A   |
| 26. Derivation of themes               | Were themes identified in advance or derived from the data?                                                                         | 9     |
| 27. Software                           | What software, if applicable, was used to manage the data?                                                                          | 9     |
| 28. Participant checking               | Did participants provide feedback on the findings?                                                                                  | N/A   |
| <i>Reporting</i>                       |                                                                                                                                     |       |
| 29. Quotations presented               | Were participant quotations presented to illustrate the themes/findings?<br>Was each quotation identified? e.g., participant number | 11-15 |
| 30. Data and findings consistent       | Was there consistency between the data presented and the findings?                                                                  | 11-15 |
| 31. Clarity of major themes            | Were major themes clearly presented in the findings?                                                                                | 11-15 |
| 32. Clarity of minor themes            | Is there a description of diverse cases or discussion of minor themes?                                                              | N/A   |

1  
2  
3  
4  
5  
6  
7  
8  
9  
10  
11  
12  
13  
14  
15  
16  
17  
18  
19  
20  
21  
22  
23  
24  
25  
26  
27  
28  
29  
30  
31  
32  
33  
34  
35  
36  
37  
38  
39  
40  
41  
42  
43  
44  
45  
46  
47

For peer review only

# BMJ Open

## Health Data Ecosystem in Pakistan – A Multi-sectoral Qualitative Assessment of Needs and Opportunities

|                                 |                                                                                                                                                                                                                                                                                                                                                                                                                                                                                                                                                                                                                                                                                                                                                                                                                                                                                                                 |
|---------------------------------|-----------------------------------------------------------------------------------------------------------------------------------------------------------------------------------------------------------------------------------------------------------------------------------------------------------------------------------------------------------------------------------------------------------------------------------------------------------------------------------------------------------------------------------------------------------------------------------------------------------------------------------------------------------------------------------------------------------------------------------------------------------------------------------------------------------------------------------------------------------------------------------------------------------------|
| Journal:                        | <i>BMJ Open</i>                                                                                                                                                                                                                                                                                                                                                                                                                                                                                                                                                                                                                                                                                                                                                                                                                                                                                                 |
| Manuscript ID                   | bmjopen-2023-071616.R1                                                                                                                                                                                                                                                                                                                                                                                                                                                                                                                                                                                                                                                                                                                                                                                                                                                                                          |
| Article Type:                   | Original research                                                                                                                                                                                                                                                                                                                                                                                                                                                                                                                                                                                                                                                                                                                                                                                                                                                                                               |
| Date Submitted by the Author:   | 11-Jul-2023                                                                                                                                                                                                                                                                                                                                                                                                                                                                                                                                                                                                                                                                                                                                                                                                                                                                                                     |
| Complete List of Authors:       | Mahmood, Sana; Aga Khan University; Aga Khan University, Department of Community Health Sciences<br>Noorali, Ali Aahil; The Aga Khan University<br>Manji, Afshan; Aga Khan University, Department of Medicine; Aga Khan University<br>Afzal, Noreen; The Aga Khan University<br>Abbas, Saadia; Aga Khan University, Department of Medicine<br>Qamar, Javeria Bilal; Aga Khan University, Department of Medicine<br>Siddiqi, Sameen; Aga Khan University Medical College Pakistan, Community Health Sciences Department<br>Hoodbhoy, Zahra; Aga Khan University, Department of Pediatrics and Child Health<br>Virani, Salim; Michael E. DeBakey Veterans Affairs Medical Center HSR&D, Health Policy, Quality & Informatics Program,<br>Bhutta, Zulfiqar; Hosp Sick Children, Centre for Global Child Health<br>Samad, Zainab; The Aga Khan University; Duke Clinical Research Institute, Department of Medicine |
| <b>Primary Subject Heading</b>: | Public health                                                                                                                                                                                                                                                                                                                                                                                                                                                                                                                                                                                                                                                                                                                                                                                                                                                                                                   |
| Secondary Subject Heading:      | Qualitative research                                                                                                                                                                                                                                                                                                                                                                                                                                                                                                                                                                                                                                                                                                                                                                                                                                                                                            |
| Keywords:                       | QUALITATIVE RESEARCH, PUBLIC HEALTH, Quality in health care < HEALTH SERVICES ADMINISTRATION & MANAGEMENT                                                                                                                                                                                                                                                                                                                                                                                                                                                                                                                                                                                                                                                                                                                                                                                                       |
|                                 |                                                                                                                                                                                                                                                                                                                                                                                                                                                                                                                                                                                                                                                                                                                                                                                                                                                                                                                 |

SCHOLARONE™  
Manuscripts

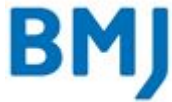

I, the Submitting Author has the right to grant and does grant on behalf of all authors of the Work (as defined in the below author licence), an exclusive licence and/or a non-exclusive licence for contributions from authors who are: i) UK Crown employees; ii) where BMJ has agreed a CC-BY licence shall apply, and/or iii) in accordance with the terms applicable for US Federal Government officers or employees acting as part of their official duties; on a worldwide, perpetual, irrevocable, royalty-free basis to BMJ Publishing Group Ltd ("BMJ") its licensees and where the relevant Journal is co-owned by BMJ to the co-owners of the Journal, to publish the Work in this journal and any other BMJ products and to exploit all rights, as set out in our [licence](#).

The Submitting Author accepts and understands that any supply made under these terms is made by BMJ to the Submitting Author unless you are acting as an employee on behalf of your employer or a postgraduate student of an affiliated institution which is paying any applicable article publishing charge ("APC") for Open Access articles. Where the Submitting Author wishes to make the Work available on an Open Access basis (and intends to pay the relevant APC), the terms of reuse of such Open Access shall be governed by a Creative Commons licence – details of these licences and which [Creative Commons](#) licence will apply to this Work are set out in our licence referred to above.

Other than as permitted in any relevant BMJ Author's Self Archiving Policies, I confirm this Work has not been accepted for publication elsewhere, is not being considered for publication elsewhere and does not duplicate material already published. I confirm all authors consent to publication of this Work and authorise the granting of this licence.

## Health Data Ecosystem in Pakistan – A Multi-sectoral Qualitative Assessment of Needs and Opportunities

**Authors:** Sana Mahmood EdM <sup>1,2,3</sup>, Ali Aahil Noorali MBBS <sup>4,5</sup>, Afshan Manji MSc <sup>4,5</sup>, Noreen Afzal MPhil <sup>1</sup>, Saadia Abbas <sup>4</sup>, Javeria Bilal Qamar <sup>4</sup>, Sameen Siddiqi DrMed <sup>2</sup>, Zahra Hoodbhoy PhD<sup>6</sup>, Salim S. Virani PhD<sup>7</sup>, Zulfiqar A. Bhutta, PhD <sup>3</sup>, Zainab Samad MHS <sup>3,4,8</sup>

### Affiliations:

<sup>1</sup> Dean's Office, Medical College, Aga Khan University, Karachi, Pakistan

<sup>2</sup> Department of Community Health Sciences, Aga Khan University, Karachi, Pakistan

<sup>3</sup> Institute of Global Health and Development, Aga Khan University, Karachi, Pakistan

<sup>4</sup> Department of Medicine, Medical College, Aga Khan University, Karachi, Pakistan

<sup>5</sup> CITRIC Health Data Science Center, Medical College, Aga Khan University, Karachi, Pakistan

<sup>6</sup> Department of Pediatrics and Child Health, Aga Khan University, Karachi, Pakistan

<sup>7</sup> Division of Cardiology, Department of Medicine, Baylor College of Medicine, USA

<sup>8</sup> Division of Cardiology, Department of Medicine, Duke University, Duke Global Health Institute, Duke Clinical Research Institute, Durham, NC

### Corresponding Author:

Zainab Samad, MBBS, MHS

Aga Khan University, Stadium Road, Karachi, Pakistan, 74800

Email: [samad.zainab@aku.edu](mailto:samad.zainab@aku.edu)

Phone: 03002017196

1  
2  
3  
4  
5  
6  
7  
8  
9  
10  
11  
12  
13  
14  
15  
16  
17  
18  
19  
20  
21  
22  
23  
24  
25  
26  
27  
28  
29  
30  
31  
32  
33  
34  
35  
36  
37  
38  
39  
40  
41  
42  
43  
44  
45  
46  
47  
48  
49  
50  
51  
52  
53  
54  
55  
56  
57  
58  
59  
60

**Word count:**

4,255 words

For peer review only

## Abstract

### Objective:

Data are essential for tracking and monitoring of progress on health-related sustainable development goals (SDGs). But the capacity to analyze subnational and granular data is limited in low- and middle-income countries. Although Pakistan lags behind on achieving several health-related SDGs, its health information capacity is nascent. Through an exploratory qualitative approach, we aimed to understand the current landscape and perceptions on data in decision making among stakeholders of the health data ecosystem in Pakistan.

### Design:

We used an exploratory qualitative study design.

### Setting:

This study was conducted at the Aga Khan University, Karachi, Pakistan.

### Participants:

We conducted semi-structured, in-depth interviews with multidisciplinary and multisectoral stakeholders from academia, hospital management, government, NGOs, and other relevant private entities till thematic saturation was achieved. Interviews were recorded and transcribed, followed by thematic analysis using NVivo.

### Results:

Thematic analysis of 15 in-depth interviews revealed three major themes: 1) Institutions are collecting data, but face barriers to its effective utilization for decision making. These include lack of collection of needs-responsive data, lack of a gender/equity in data collection efforts, inadequate digitization, data reliability, and limited analytical ability; 2) There is openness and enthusiasm for sharing data for advancing health, however, multiple barriers hinder this



1  
2  
3 including appropriate regulatory frameworks, platforms for sharing data, inter-operability, and  
4 defined win-win scenarios; 3) There is limited capacity in the area of both human capital and  
5 infrastructure, for being able to use data to advance health but there is appetite to improve and  
6 invest in capacity in this area  
7  
8  
9  
10  
11  
12  
13  
14

15 **Conclusions:**

16  
17 Our study identified key areas of focus that can contribute to orient a national health data  
18 roadmap and ecosystem in Pakistan.  
19  
20  
21  
22  
23  
24  
25  
26  
27  
28  
29  
30  
31  
32  
33  
34  
35  
36  
37  
38  
39  
40  
41  
42  
43  
44  
45  
46  
47  
48  
49  
50  
51  
52  
53  
54  
55  
56  
57  
58  
59  
60

### Strengths and limitations of this study

- Our study is the first multi-disciplinary endeavor to explore perceptions around health data and health data science in Pakistan.
- We present perspectives from a low resource setting which has contextual relevancy and implications for other LMICs in the region.
- Our study participants were experts and decision makers from multiple sectors, across provinces, and with work at the intersection of health and data science.

Our findings may not provide room for generalizability, beyond the Global South.

## Introduction

Data are essential for tracking and monitoring progress on health-related sustainable development goals (SDGs).[1–3] While data and data analytics are being used in high income countries (HICs) to improve health equity, health outcomes, and continuously inform healthcare systems, their use in low-middle-income countries (LMICs) is lagging.[4–8] Investing in data ecosystems represents an important opportunity for monitoring and quickening progress on health-related SDGs in LMICs.[1,8,11,12]

With a population of 230 million, Pakistan, the fifth most populous LMIC, has a high estimated mortality and morbidity burden for various diseases, but its health system and health information system capacity is nascent.[13,14] However, during the COVID-19 pandemic, data were made nationally available in almost real-time, and data science methods were used to inform health policy and population level interventions such as smart lock downs and vaccinations efforts.[15,16] multi-stakeholder and interprovincial collaboration underpinned this successful effort and highlighted the need for a national health data ecosystem outside of crisis situations.

To inform such future efforts, an understanding of the current perceptions around health data, its use in decision making and the health data ecosystem in Pakistan is required. To this end, we adopted a qualitative approach to understand the current landscape as well as perceptions on data in decision-making among a wide range of stakeholders.

## Methods

### Study Design and Setting:

This was an exploratory qualitative study with the primary objectives to comprehend the scope of the health data ecosystem in Pakistan, the knowledge and attitudes around developing partnerships and sharing data, and perceptions around the need for developing health data science capacity in Pakistan.

The study was led by investigators at the Aga Khan University (AKU) in Pakistan. With a forty-year presence in Pakistan, AKU has well established partnerships at both provincial and national levels, with government and academia, enabling regular engagement in interdisciplinary policy discussions and fora.

### Study instrument:

A semi-structured interview guide was designed using carefully curated questions (available in supplement 1). The guide prompted a detailed discussion on the landscape and scope of existing health data. Further discussion was rooted in potential facilitators and barriers to building a national health data collaborative that would contribute to improved health outcomes in Pakistan.

This included understanding the nature of existing policies and collaboratives, the availability and need of human capital for health data initiatives, and structures—from governance to infrastructure, which were present or would need to be developed and implemented to allow for organizations across sectors to comfortably share data to advance health outcomes in Pakistan.

The guide was pilot tested among a diverse cohort of four individuals and judged for clarity of questions. Feedback from the pilot testing was incorporated to address gaps in the interview

1  
2  
3  
4 guide. Interviews were conducted by two female investigators (ZS and SM), who were the  
5  
6  
7 departmental chair and director, respectively, while the research staff (AAN, AA, SA, JBQ)  
8  
9  
10 acted as observers. Standardization was maintained across all interviews by ensuring that the  
11  
12  
13 same two interviewers conducted all the interviews with the same guide. Both interviewers had  
14  
15  
16 prior experience of conducting qualitative interviews. Each interview was conducted online for a  
17  
18  
19 duration that varied between 30 minutes and 2 hours.  
20  
21  
22  
23  
24

### 25 **Sampling, Inclusion and Exclusion Criteria:**

26  
27  
28 A scoping exercise was conducted to identify experts and relevant institutions. Through  
29  
30 discussion, the investigators collectively identified key sectors in the health ecosystem of  
31  
32 Pakistan for a landscape analysis which formed the inclusion criteria: 1. University and academia  
33  
34 with faculty in health and/or information technology (IT), 2. Senior-level hospital management  
35  
36 (both private and public) 3. Government ministers (federal and provincial/state), 4. Non-  
37  
38 governmental organizations (NGOs) and 5. Private-sector organizations (pharmaceutical,  
39  
40 finance, and health insurance sectors). (Figure 1) There were no major or minor exclusion  
41  
42 criteria.  
43  
44  
45

46  
47 Following convenience sampling to select key stakeholders with a particular focus on those with  
48  
49 management/decision-making roles, invites were extended via email, and interviews were  
50  
51 arranged. Thematic saturation was reached at 15 which comprised the final study sample. Based  
52  
53 on the SDGs 4, 5 and 9 [17] (quality education, gender equality and industry, innovation and  
54  
55 infrastructure respectively), we performed a mapping of major institutions across these domains  
56  
57

1  
2  
3 in the public and private health sectors, private organizations and NGOs. Major institutions were  
4 defined as those that were expected to have organizational maturity and scale in the area of  
5 capacity to collect data. Lastly, individuals with at least five years of leadership experience in  
6 their respective domains were eligible to participate in the study.  
7  
8  
9  
10  
11  
12  
13

### 14 **Data Analysis:**

15 Grounded theory and the six-step method of thematic analysis of Braun and Clarke (2006)  
16 guided the analytical process.[18] Interviews were first audio recorded and transcribed verbatim.  
17 Since the research staff were not only observers, but also transcribers for the interviews, these  
18 roles helped them get familiarized and immersed with the collected data. Transcripts were  
19 imported into NVivo (version 12). An initial list of a priori codes was used by two research team  
20 members (AAN and AM) to code the transcripts. New codes emerging from the data, which  
21 were deemed relevant to the study objectives were also added to this list. This codebook was  
22 refined through iteration and consensus among research staff which helped in standardization of  
23 codes applied in all transcripts.  
24  
25  
26  
27  
28  
29  
30  
31  
32  
33  
34  
35  
36

37 Data coded under similar codes were then grouped to identify major themes, which were paired  
38 with direct verbatim quotations from the interviewees. The themes were then reviewed to ensure  
39 adequate data and participant quotations supported the creation of each theme. All themes were  
40 then defined to convey an adequate description of its subthemes and relevant data. Lastly, the  
41 results were written in a format to describe the analyzed data.  
42  
43  
44  
45  
46  
47  
48  
49  
50

### 51 **Patient and Public Involvement**

52  
53  
54  
55  
56  
57  
58  
59  
60

1  
2  
3 Patients and the public were not involved in the research design, analysis and dissemination of  
4  
5 the findings.  
6  
7  
8  
9

### 10 **Ethical Considerations:**

11  
12 The study received approval from the Ethical Review Committee at AKU (ERC # 2021-5839-  
13  
14 16883). Written informed consent over email for the study was obtained from each participant  
15  
16 before starting the interview.  
17  
18  
19  
20

### 21 **Results**

22  
23 We conducted 15 in-depth interviews with a diverse range of stakeholders from five centralized  
24  
25 cohorts. Sector and designation of the participants are described in Table 1. Thematic analysis  
26  
27 generated three overarching themes: 1) Institutions are collecting data, but face barriers to its  
28  
29 effective utilization for decision making. These include lack of collection of needs-responsive  
30  
31 data, lack of a gender/equity in data collection efforts, inadequate digitization, data reliability,  
32  
33 and limited analytical ability.; 2) There is openness and enthusiasm for sharing data for  
34  
35 advancing health, however, multiple barriers hinder this endeavor; 3) There is limited capacity in  
36  
37 the area of both human capital and infrastructure, for being able to use data to advance health but  
38  
39 there is appetite to improve capacity in this area.  
40  
41  
42  
43  
44

| 45 <b>Table 1: Sector and designation of study</b> |                 |
|----------------------------------------------------|-----------------|
| 46 <b>participants (n=15)</b>                      |                 |
| 47 <b>Sector</b>                                   | 48 <b>N (%)</b> |
| 49 Academia                                        | 1               |
| 50 Hospitals                                       | 2               |
| 51 Government                                      | 3               |
| 52 Non-governmental organizations (NGOs)           | 3               |
| 53 Private-sector organizations                    | 6               |
| 54                                                 |                 |
| 55                                                 |                 |
| 56 <b>Designation</b>                              |                 |
| 57                                                 |                 |

|                       |   |
|-----------------------|---|
| Mid-level management  | 5 |
| Chief medical officer | 2 |
| Health minister       | 2 |
| Senior management     | 6 |

**Theme 1: Institutions are collecting data, but face barriers to its effective utilization for decision making. These include lack of collection of needs-responsive data, lack of gender/equity in data collection efforts, inadequate digitization, data reliability and limited analytical ability.**

Experts communicated that there are several initiatives at the intersection of health and data, and organizations are collecting and holding data, but these initiatives exist in silos. Institutions have a large volume of operational data, but several barriers to their effective utilization were identified. These ranged from lack of collection of needs-responsive data, inadequate digitization, inappropriate data formats, data reliability, value placed on ultimate data use by data collectors, and human capacity to gauge scientific insights from it.

Adequate data mapping and dataset awareness within institutions affecting access and use was identified as a barrier. An expert in digital health strategy noted that *“I would think that the dissemination of the data is a far bigger issue than the data holes being there. So, if you start digging, you find data sets, but you see that no one is aware of them, even though a lot of activity has happened”*.

Leaders identified lack of needs-responsive data collection as a barrier to effective utilization of data for decision making. A provincial health minister stated that, *“We find that getting population level information is really difficult. And you can get this information, but it's not really formalized - you just hear verbal estimates. So, in terms of planning, there is no common*



1  
2  
3 *information base that people have that is like the gold standard.*” In a similar vein, a leader in a  
4  
5 prominent healthcare institution noted, *“There are very few hospitals in Pakistan that actually*  
6  
7 *record quality and patient safety data. So, hospital quality level data, the kind that exists in the*  
8  
9 *NHS, or in the US etc. doesn’t exist here.*” In addition, most participants noted that gender and  
10  
11 equity lens have not been widely considered, neither during the collection and analysis of health  
12  
13 data, nor in the design of research and data driven initiatives. With regards to gender, a leader at  
14  
15 a non-profit organization explained that: *“Disaggregated data by gender is probably a large*  
16  
17 *problem nationally, particularly with development indicators.*” Equity is often overlooked in  
18  
19 conversations around data, and when considered, the level of commitment is inadequate. A  
20  
21 governmental leader mentioned that: *“Unfortunately, I think equity is more a function of*  
22  
23 *conversations with development partners. And it does translate to some commitment, but not the*  
24  
25 *level of commitment that should be the case.*”

26  
27  
28  
29  
30  
31  
32 The digitization and structure of available data is another holdup, as stated by a manager at a  
33  
34 non-governmental organization: *“Some organizations don't have data in a format that's easily*  
35  
36 *accessible, because they don't have electronic systems.*” Most participants shared the perception  
37  
38 that there is a lack of an appropriately designed system to help collate data to its most desired  
39  
40 format. This sentiment was shared by another expert in epidemiology at a tertiary care hospital,  
41  
42 who noted that, *“The reality was when I came in, I realized that the structure of the data being*  
43  
44 *collected, was not conducive to be pulled out, right, so we couldn't do any research.*” Another  
45  
46 expert at an NGO noted, *“When I joined X organization, all this information was collected on*  
47  
48 *different platforms, some of this was paper based, some of it was collected with in-house*  
49  
50 *applications. And none of it was necessarily standards-based. And none of these applications*  
51  
52 *were well designed for information sharing.*

1  
2  
3 Data reliability was another aspect highlighted in the interviews. Specifically in the context of  
4 data sharing, a leader at an NGO noted, *“You get conflicting information....who is going to verify  
5 whether database A is correct or database B is correct”*  
6  
7  
8  
9

10  
11 A provincial minister also suggested that while data-driven initiatives do exist, there is  
12 sometimes lack of clarity regarding the purpose and objectives of successfully collecting data  
13 and ultimately value attached to these efforts among those collecting and managing this  
14 information. *“We tried to give the lady health workers an app to update in real time to update  
15 the data about the diseases that they are seeing and the pregnant women that they are seeing. We  
16 don’t have a proper accountability system and so we cannot tell people that this is something  
17 important for health policy and interventions and for a database for knowledge.”*  
18  
19  
20  
21  
22  
23  
24  
25  
26  
27

28 Many interviewees felt that where data did exist, there were other obstacles like significant  
29 deficits in staffing and the inability to utilize the collected data. A leader in an NGO noted, *“We  
30 do not have trained people in the system, even people who have dealt with data for a long time,  
31 do not have the analytical skills to make sense of it, draw conclusions, and ask questions. That  
32 has been a real challenge.”*  
33  
34  
35  
36  
37  
38  
39  
40  
41  
42

43 **Theme 2: There is openness and enthusiasm for sharing data for advancing health,**  
44 **however, multiple barriers hinder this including appropriate regulatory frameworks,**  
45 **platforms for sharing data, inter-operability, and defined win-win scenarios**  
46  
47  
48  
49  
50

51 Considering a shared vision to improve health outcomes in Pakistan, leaders indicated overall  
52 willingness to share data and partner for this common mission, expressing keen interest and  
53  
54  
55  
56  
57

1  
2  
3 stating their openness to proposals and collaborations. Defining win-win scenarios would be  
4  
5 critical to organizations sharing data. A government leader observed: *“I think we are open to*  
6  
7 *proposals where, say, we make data in specific areas available. As long as we get something in*  
8  
9 *return - if I can get more immediate impact out of that process, then that would excite me more.*  
10  
11 *So you name an area where we can problem-solve, and we can actually close the loop on that*  
12  
13 *partnership (in terms of how we can actually translate it to some impact).”* Interestingly, an  
14  
15 epidemiologist at a tertiary care hospital shared insights about ensuring that a shared  
16  
17 collaborative keeps ‘democracy of data’ as a central guiding principle: *“I think there has to be*  
18  
19 *democracy of data sharing within an organization because there's no point hanging on to data,*  
20  
21 *and not sharing it so that somebody can make use of it, and that is one of the problems; people*  
22  
23 *hang on to data as a good treasure that they cannot share with anybody.”*  
24  
25  
26  
27  
28  
29

30 Most experts shared that certain challenges and pertinent questions would need to be accounted  
31  
32 for to build a sustainable, shared, accessible data ecosystem. These include the validity and  
33  
34 accuracy of datasets themselves, privacy and regulatory framework around data sharing,  
35  
36 addressing systemic differences between different sectors and inadequate workforce and training.  
37  
38 Experts shared that even if the data exists, dissemination of data is always an issue because data  
39  
40 governance is a nascent field in Pakistan. The term governance is also used broadly by  
41  
42 interviewees that use it to refer to privacy and security of data as well as an overarching  
43  
44 governing structure to establish appropriate ownership of data. An entity leader, at a premier  
45  
46 bank, noted that this also holds true for other sectors of Pakistan, such as the well-resourced  
47  
48 finance sector, where one of the country’s largest banks is still working through the early stages  
49  
50 of data governance. Furthermore, structuring a data system to be useful requires understanding  
51  
52 what data fields one has in their database, what should go into those data fields, and a system that  
53  
54  
55  
56  
57  
58  
59  
60

1  
2  
3 is designed to ensure a clear utilitarian purpose. Though governance appears to be a major barrier  
4  
5 for a data collaborative, subjects report that missing-ness and access to data are also impediments  
6  
7 to utilization.  
8  
9

10  
11 A manager and planning executive at a bank, noted: *“Some concerns in data sharing include*  
12  
13 *who will own the data, what will be done with the data? Will the data remain valid or not, will*  
14  
15 *transparency be maintained, privacy rules will be followed or not, ownership of the data? Where*  
16  
17 *will data be used ultimately.”*  
18  
19

20  
21 Similarly, a chief medical officer at a tertiary hospital mentioned that: *“There needs to be a lot*  
22  
23 *more structure put into data sharing, and by structure, what I mean is that rules and regulations*  
24  
25 *(which need to be set up a priori). That will really give confidence to individual institutions and*  
26  
27 *individuals who own that data - that their data is going to be used properly, reliably and*  
28  
29 *honestly”.*  
30  
31

32 Interoperability of data sets was reported as a big challenge due to differences in dataset formats  
33  
34 and different data capacity/skills across different institutions and across public and private  
35  
36 institutions. Issues of interoperability are further pronounced when complemented with  
37  
38 differences in the approach of private vs public sectors and inpatient vs outpatient data. A leader  
39  
40 in healthcare administration stated that *“Record keeping is something that is very poor there. In-*  
41  
42 *patient record keeping is there, but there is nothing for out-patients at all. The private sector*  
43  
44 *does keep the record, but the public sector does not. But the private sector does not share that*  
45  
46 *data at all”*  
47  
48  
49  
50  
51  
52  
53  
54  
55  
56  
57  
58  
59  
60

1  
2  
3 **Theme 3: There is limited capacity in the area of both human capital and infrastructure,**  
4 **for being able to use data to advance health but there is appetite to improve and invest in**  
5 **capacity in this area**  
6  
7  
8  
9

10 Inadequate human resources in data management and analytical skills in organizations was  
11 identified as a major barrier to both effective internal use of data and external collaborative data  
12 sharing efforts. Participants remarked that data sharing through a collaborative, would require  
13 capacity-building in this area.  
14  
15  
16  
17  
18  
19

20 A manager at an NGO noted: *“The issue is not whether people are willing to share data. But*  
21 *certain organizations, traditional non-profit ones for example, don’t have data teams or data*  
22 *managers (because of cost budgetary constraints). So, I think that these organizations often*  
23 *don’t have the capacity to manage data.”* It was also mentioned that lack of capacity building  
24 was a barrier to successfully analyzing and synthesizing data. A provincial healthcare leader  
25 noted: *“The main problem here is that we don’t have an HR [human resource] there or a proper*  
26 *computerized system there to log in that data and upload it. We have a lot of restrictions in the*  
27 *IT department.”* Similarly, a senior leader at a tertiary care hospital mentioned: *“We have the*  
28 *data, but we don’t have the capacity and capability to analyze it and make changes in*  
29 *healthcare.”* There is clear appetite and keen interest in investing organizational data capacity  
30 ranging from investing in needs-responsive data repositories and electronic systems, to upskilling  
31 the current workforce. A representative from academia shared their experience of setting up a  
32 data repository and its potential future impact: *“The long-term objective of this Higher Education*  
33 *Data Repository initiative is that we collect all the granular information throughout a student’s*  
34  
35  
36  
37  
38  
39  
40  
41  
42  
43  
44  
45  
46  
47  
48  
49  
50  
51  
52  
53  
54  
55  
56  
57  
58  
59  
60

1  
2  
3  
4 *life cycle. This will generate a lot of data for analysis, about what kind of educational needs we*  
5  
6  
7 *have in our system, what kind of courses do we need to specialize in for our students and the*  
8  
9 *areas that our faculty members need to specialize in.”*  
10

11  
12 A representative from a large public sector tertiary care hospital reported their initiative of data  
13  
14 automation and the barriers associated with it: *"We have begun an initiative at our hospital*  
15  
16 *where we are starting to do automation of the data and that is happening ... That is also not*  
17  
18 *working because our staffing there has been rejected so we are now trying to have a medical*  
19  
20 *record system as an operative thing to see how the medical reforms will work.”*  
21  
22

23  
24  
25 An NGO leader described the process, components, and importance of building a data-driven  
26  
27 team – a cohesive unit of trained individuals that understand the application of data sciences to  
28  
29 health. He stated: *“There are four skills that I think are important in building out a data team*  
30  
31 *that we found. One is data engineering, which is just someone who can query databases,*  
32  
33 *particularly complex databases...Then, I think the next skill that we found useful is analytics,*  
34  
35 *which is how to develop dashboards. And that is a very easily trainable skill. So, the third skill*  
36  
37 *that's (commonly) not there is knowing what dashboard to make. And the fourth skill is data*  
38  
39 *science, which is basically being able to model data and that's an even rarer skill especially*  
40  
41 *locally.”*  
42  
43

44  
45 A key skill within building capacity to manage and analyze data is the ability to effectively  
46  
47 communicate results. A government health leader also delineated the importance of  
48  
49 communication in building health data capacity which may be an essential, yet neglected, skill.  
50  
51 She stated that, *“There must be a trigger factor that allows the person to do a communications*  
52  
53  
54  
55  
56  
57

1  
2  
3 *strategy and awareness policy to send that message across. I think communication is very*  
4  
5 *important. You specifically need to know how to communicate.”*  
6

7  
8 A Government leader also stated the need for and importance of on-the-job training by stating  
9  
10 that “*For me, the single silver bullet is creating data management routines that act as on the job*  
11 *training for managers.”* He added, “*... you need a data boot camp for health leaders, like that is*  
12 *weeklong. And that is sort of morning to night. And that's trying to basically break their thinking*  
13 *and get them to use differently the information that is available, because there is still a lot more*  
14 *information that is available.”*  
15  
16  
17  
18  
19  
20  
21  
22  
23  
24  
25

## 26 **Discussion**

27  
28  
29 Our study is the first, multi-disciplinary endeavor to understand perceptions on health data and  
30 health data science in Pakistan. The main finding from our qualitative analysis is that the scope  
31 of data science in health for advancing health outcomes, is far-reaching in Pakistan and likely in  
32 other LMICs where organizations have collected a great deal of data but are in the early stages of  
33 understanding how best to leverage and utilize this data. Furthermore, there is potential for  
34 establishing a health data ecosystem comprised of a health data collaborative with an appropriate  
35 governance structure, intentionality toward data design elements focusing on gender, equity, and  
36 needs-responsiveness, that is supported by appropriate capacity building initiatives. Our study  
37 findings suggest that while we are at nascent stages of using data to progress a national health  
38 agenda, several independent and national efforts are being made to allow for digitization and  
39 automation in healthcare and there is keen interest in investment in building capacity in this area.  
40  
41  
42  
43  
44  
45  
46  
47  
48  
49  
50  
51  
52  
53  
54 [19]Even though the far-reaching scope of health data and data science methods in healthcare  
55  
56  
57  
58  
59  
60

1  
2  
3 and their potential benefits are recognized by developing countries, development of a national  
4 data collaborative that might serve as a foundational block of a larger health data ecosystem is a  
5 complex endeavor and presents some challenges.[12] A principal lever for this agenda is timely  
6 access to the right information, but this has been a scarce resource in LMICs.[19]  
7

8  
9  
10  
11  
12 Lack of rigorous and structured systems, problems with accuracy, credibility and completeness,  
13 inadequacy of trained personnel with core competencies, and unavailability of analytic tools  
14 were core obstacles highlighted by experts. Furthermore, there are very limited efforts to  
15 propagate a multimodal, multisectoral, and multidisciplinary approach to data, leading to a  
16 conspicuous lack of a central repository of information in LMICs like Pakistan.[8] In line with  
17 recent literature, a key concern highlighted by participants in data sharing was safeguarding their  
18 privacy, confidentiality, and security, with all interviewees agreeing to the need of a governance  
19 and regulatory framework being set up a priori to ensure data transparency and maintaining the  
20 trust of all parties involved that their data will be used honestly and reliably.[8,20]  
21

22  
23  
24  
25  
26  
27  
28  
29  
30  
31  
32  
33 Our participants also stated that the analysis, design, and collection of health data does not  
34 currently support gender and equity lens as the core of any organization. Disaggregation of data  
35 by gender is a problem nationally and is difficult to find. Literature suggests that health system  
36 policy development does not always pay adequate attention to gender and even when policies do  
37 include gender, intentions can evaporate when it comes to actual implementation.[21,22] Study  
38 participants suggested that equity was often a function of conversation with development  
39 partners and that the level of commitment to inclusion of equity needed to be increased.  
40

41  
42  
43  
44  
45  
46  
47  
48  
49 Tannenbaum et al. and The World Bank note that gender data is a powerful tool for improving  
50 lives as lack of disaggregated gender information has resulted in an incomplete disease  
51 understanding.[23,24] Furthermore, gender equity is an integral component of social  
52



1  
2  
3 responsibility and according to International Organization for Standardization (ISO) 26000  
4 Sustainable Development Goal 5 (Guidance on Social Responsibility), whereby the standard  
5 denotes the importance of having gender-inclusive leadership and governance in ensuring  
6 elimination of gender bias and promotion of gender parity.[25]  
7  
8  
9

10 Our study participants mentioned how organizations collect and store data, have information  
11 management systems, but that data is not being utilized in the most effective way, due to limited  
12 capacity and skillsets. [26] Hence, they emphasized that translation and evidence synthesis  
13 require significant capacity building. A systematic review reflects on the importance of ongoing  
14 training and multilevel strategies needed in development of such programs, and how capacity  
15 building can influence different levels of entire organizations and systems.[27] The types of  
16 interventions assessed included internet-based teaching and workshops. The results of a  
17 worldwide cross-sectional survey by Kaggle et. al, illustrates the extent to which companies in  
18 various countries have adapted to machine learning models, with Israel surpassing even the  
19 United States.[28] . This need also represents an opportunity to develop local, contextual health  
20 data science programs that equip individuals with appropriate data management and data  
21 analytics skills[29].  
22  
23  
24  
25  
26  
27  
28  
29  
30  
31  
32  
33  
34  
35  
36  
37  
38  
39

40 A national strategy on establishing a robust health data ecosystem and data collaborative for  
41 Pakistan will be an important next step. This necessitates that the gaps identified globally and in  
42 our qualitative interviews are bridged and data are put into action. In this regard, a national  
43 health digital framework has recently been developed by the Ministry of Health, which can be  
44 used for developing a high-level roadmap. As noted by healthcare experts, the roadmap is to  
45 help healthcare professionals use data science principles to inform decision making, uplifting  
46 research, and guiding clinical approaches to improve healthcare delivery.[30,31]  
47  
48  
49  
50  
51  
52  
53  
54  
55  
56  
57  
58  
59  
60

1  
2  
3 This study has a few limitations. Our findings mainly stemming from interviews among leaders  
4  
5 in the healthcare system of Pakistan do not provide such larger room for generalizability beyond  
6  
7 the Global South. However, we present perspectives from a low resource setting which has  
8  
9 contextual relevancy and implications for other LMICs in the region. Qualitative interviews  
10  
11 focused on perspectives from key management leads at major institutions. This was primarily  
12  
13 because the scope and objectives of this exercise were to assimilate input from experts and  
14  
15 leaders in management, policy, and healthcare. A next step, on establishing a health data  
16  
17 collaborative, will be to ensure data and perspectives from patients and communities, who serve  
18  
19 as key stakeholders in healthcare systems.  
20  
21  
22  
23  
24  
25

## 26 **Conclusion**

27  
28 The present study highlights important opportunities and barriers that need to be addressed to  
29  
30 develop a health data ecosystem in Pakistan. Creation of appropriate governance, regulatory  
31  
32 frameworks, gender and equity indicators, and defining win-win scenarios, are important  
33  
34 principles to consider for planning any national health data collaboratives. To enable this  
35  
36 ecosystem, collaboration is required on strategic outlining of how data can be collated,  
37  
38 organized, curated, updated, and finally pipelined. For achieving this goal, building data science  
39  
40 capacity within organizations would be critical, thus providing the ability to leverage health data  
41  
42 to its full potential for informed decision making.  
43  
44  
45  
46  
47  
48  
49  
50  
51  
52  
53  
54  
55  
56  
57  
58  
59  
60

## Contributors

All authors confirm that they had full access to all the data in the study and accept responsibility to submit for publication.

ZS conceived of, designed the study, collected data, and acquired funding.

SM collected the data and wrote the original draft of the manuscript.

AAN analyzed and interpreted the data and wrote the original draft of the manuscript.

AM analyzed and interpreted the data and wrote the original draft of the manuscript.

NA wrote the original draft of the manuscript.

SA was involved in data curation and manuscript writing.

JQB was involved in data curation and manuscript writing.

SS wrote the original draft of the manuscript.

ZH wrote the original draft of the manuscript.

ZAB wrote the original draft of the manuscript.

SSV wrote the original draft of the manuscript.

All authors contributed to critically reviewing and editing the manuscript.

## Declaration of interests

We declare no competing interests.

## Funding

1  
2  
3 This work was supported through a grant from the Bill & Melinda Gates Foundation (grant  
4 number: INV-021944).  
5  
6  
7  
8  
9

### 10 **Data availability statement**

11 No data are available.  
12  
13  
14  
15

### 16 **Ethics approval**

17 The study received approval from the Ethical Review Committee at AKU (ERC # 2021-5839-  
18 16883).  
19  
20  
21  
22  
23  
24  
25

### 26 **License statement**

27 I, the Submitting Author has the right to grant and does grant on behalf of all authors of the  
28 Work (as defined in the below author license), an exclusive license and/or a non-exclusive  
29 license for contributions from authors who are: i) UK Crown employees; ii) where BMJ has  
30 agreed a CC-BY license shall apply, and/or iii) in accordance with the terms applicable for US  
31 Federal Government officers or employees acting as part of their official duties; on a worldwide,  
32 perpetual, irrevocable, royalty-free basis to BMJ Publishing Group Ltd (“BMJ”) its licensees and  
33 where the relevant Journal is co-owned by BMJ to the co-owners of the Journal, to publish the  
34 Work in BMJ Open and any other BMJ products and to exploit all rights, as set out in our  
35 license.  
36  
37  
38  
39  
40  
41  
42  
43  
44  
45  
46  
47  
48  
49  
50

51 The Submitting Author accepts and understands that any supply made under these terms is made  
52 by BMJ to the Submitting Author unless you are acting as an employee on behalf of your  
53  
54  
55  
56  
57

1  
2  
3 employer or a postgraduate student of an affiliated institution which is paying any applicable  
4 article publishing charge (“APC”) for Open Access articles. Where the Submitting Author  
5  
6 wishes to make the Work available on an Open Access basis (and intends to pay the relevant  
7  
8 APC), the terms of reuse of such Open Access shall be governed by a Creative Commons license  
9  
10 – details of these licenses and which Creative Commons license will apply to this Work are set  
11  
12 out in our license referred to above.  
13  
14  
15  
16  
17  
18

### 19 **Figure legend**

20  
21 Figure 1: An overview of the methodological framework of the study – participant cohorts,  
22  
23 process of interview preparation, conductance, and analysis  
24  
25  
26  
27  
28  
29  
30  
31  
32  
33  
34  
35  
36  
37  
38  
39  
40  
41  
42  
43  
44  
45  
46  
47  
48  
49  
50  
51  
52  
53  
54  
55  
56  
57  
58  
59  
60

## References

- 1 Measuring progress from 1990 to 2017 and projecting attainment to 2030 of the health-related Sustainable Development Goals for 195 countries and territories: a systematic analysis for the Global Burden of Disease Study 2017. *Lancet (London, England)* 2018;**392**:2091–138. doi:10.1016/S0140-6736(18)32281-5
- 2 Transforming our world: the 2030 Agenda for Sustainable Development | Department of Economic and Social Affairs. <https://sdgs.un.org/2030agenda> (accessed 21 Nov 2022).
- 3 Sachs JD, Schmidt-Traub G, Mazzucato M, *et al*. Six Transformations to achieve the Sustainable Development Goals. *Nat Sustain* 2019 29 2019;**2**:805–14. doi:10.1038/s41893-019-0352-9
- 4 Bhavnani SP, Muñoz D, Bagai A. Data Science in Healthcare: Implications for Early Career Investigators. *Circ Cardiovasc Qual Outcomes* 2016;**9**:683–7. doi:10.1161/CIRCOUTCOMES.116.003081
- 5 Sharma A, Harrington RA, McClellan MB, *et al*. Using Digital Health Technology to Better Generate Evidence and Deliver Evidence-Based Care. *J Am Coll Cardiol* 2018;**71**:2680–90. doi:10.1016/j.jacc.2018.03.523
- 6 Ting DSW, Carin L, Dzau V, *et al*. Digital technology and COVID-19. *Nat Med* 2020 264 2020;**26**:459–61. doi:10.1038/s41591-020-0824-5
- 7 Imoto S, Hasegawa T, Yamaguchi R. Data science and precision health care. *Nutr Rev* 2020;**78**:53–7. doi:10.1093/nutrit/nuaa110

- 1  
2  
3 8 Bezuidenhout L, Chakauya E. Hidden concerns of sharing research data by low/middle-  
4 income country scientists. *Glob Bioeth = Probl di Bioet* 2018;**29**:39–54.  
5  
6 doi:10.1080/11287462.2018.1441780  
7  
8  
9  
10 9 Ting DSW, Carin L, Dzau V, *et al.* Digital technology and COVID-19. *Nat Med*  
11  
12 2020;**26**:459–61. doi:10.1038/s41591-020-0824-5  
13  
14  
15 10 Andreu-Perez J, Poon CCY, Merrifield RD, *et al.* Big data for health. *IEEE J Biomed*  
16  
17 *Heal informatics* 2015;**19**:1193–208. doi:10.1109/JBHI.2015.2450362  
18  
19  
20 11 Wyber R, Vaillancourt S, Perry W, *et al.* Big data in global health: improving health in  
21  
22 low- and middle-income countries. *Bull World Health Organ* 2015;**93**:203–8.  
23  
24 doi:10.2471/BLT.14.139022  
25  
26  
27 12 Naseem M, Akhund R, Arshad H, *et al.* Exploring the Potential of Artificial Intelligence  
28  
29 and Machine Learning to Combat COVID-19 and Existing Opportunities for LMIC: A  
30  
31 Scoping Review. *J Prim Care Community Health* 2020;**11**:2150132720963634.  
32  
33 doi:10.1177/2150132720963634  
34  
35  
36 13 Brief on Census -2017 | Pakistan Bureau of Statistics.  
37  
38 <https://www.pbs.gov.pk/content/brief-census-2017> (accessed 21 Nov 2022).  
39  
40  
41 14 Roth GA, Abate D, Abate KH, *et al.* Global, regional, and national age-sex-specific  
42  
43 mortality for 282 causes of death in 195 countries and territories, 1980–2017: a systematic  
44  
45 analysis for the Global Burden of Disease Study 2017. *Lancet* 2018;**392**:1736–  
46  
47 88.<http://www.thelancet.com/article/S0140673618322037/fulltext> (accessed 21 Nov  
48  
49 2022).  
50  
51  
52 15 Akhtar H, Afridi M, Akhtar S, *et al.* Pakistan’s Response to COVID-19: Overcoming  
53  
54 National and International Hypes to Fight the Pandemic. *JMIR Public Heal Surveill*  
55  
56  
57  
58  
59  
60

- 2021;7. doi:10.2196/28517
- 16 Haq IU, Rehman ZU. Medical Research in Pakistan; A Bibliometric Evaluation from 2001 to 2020. *Libr Philos Pract (e-journal)* <https://www.pmc.gov.pk/> (accessed 9 Dec 2022).
- 17 THE 17 GOALS | Sustainable Development. <https://sdgs.un.org/goals> (accessed 5 Jul 2023).
- 18 Braun V, Clarke V. Thematic analysis. *APA Handb Res methods Psychol Vol 2 Res Des Quant Qual Neuropsychol Biol* 2012;;57–71. doi:10.1037/13620-004
- 19 Harrison K, Rahimi N, Danovaro-Holliday MC. Factors limiting data quality in the expanded programme on immunization in low and middle-income countries: A scoping review. *Vaccine* 2020;**38**:4652–63. doi:10.1016/j.vaccine.2020.02.091
- 20 Tiffin N, George A, LeFevre AE. How to use relevant data for maximal benefit with minimal risk: digital health data governance to protect vulnerable populations in low-income and middle-income countries. *BMJ Glob Heal* 2019;**4**:e001395. doi:10.1136/bmjgh-2019-001395
- 21 Morgan R, Ayiasi RM, Barman D, *et al*. Gendered health systems: evidence from low- and middle-income countries. *Heal Res policy Syst* 2018;**16**:58. doi:10.1186/s12961-018-0338-5
- 22 Theobald S, Morgan R, Hawkins K, *et al*. The importance of gender analysis in research for health systems strengthening. *Health Policy Plan*. 2017;**32**:v1–3. doi:10.1093/heapol/czx163
- 23 Tannenbaum C, Ellis RP, Eyssel F, *et al*. Sex and gender analysis improves science and engineering. *Nature* 2019;**575**:137–46. doi:10.1038/s41586-019-1657-6
- 24 More and Better Gender Data: A Powerful Tool for Improving Lives, The World Bank.



- 1  
2  
3 2016.  
4  
5  
6 25 International Organization for Standardization 26000, Guidance on social responsibility.  
7  
8 26 Artificial Intelligence and Start-Ups in Low- and Middle-Income Countries: Progress,  
9  
10 Promises and Perils. 2020.  
11  
12 27 DeCorby-Watson K, Mensah G, Bergeron K, *et al.* Effectiveness of capacity building  
13  
14 interventions relevant to public health practice: a systematic review. *BMC Public Health*  
15  
16 2018;**18**:684. doi:10.1186/s12889-018-5591-6  
17  
18  
19 28 Bob Hayes. Machine Learning Adoption Rates Around the World. *Bus. Broadw.* 2021.  
20  
21 29 Hoodbhoy Z, Chunara R, Waljee A, *et al.* Is there a need for graduate-level programmes  
22  
23 in health data science? A perspective from Pakistan. *Lancet Glob Heal* 2023;**11**:e23–5.  
24  
25 doi:10.1016/S2214-109X(22)00459-4  
26  
27  
28 30 Bates DW, Saria S, Ohno-Machado L, *et al.* Big data in health care: using analytics to  
29  
30 identify and manage high-risk and high-cost patients. *Health Aff (Millwood)*  
31  
32 2014;**33**:1123–31. doi:10.1377/hlthaff.2014.0041  
33  
34  
35 31 Shaoibi A, Neelon B, Lenert LA. Shared Decision Making: From Decision Science to  
36  
37 Data Science. *Med Decis Mak an Int J Soc Med Decis Mak* 2020;**40**:254–65.  
38  
39 doi:10.1177/0272989X20903267  
40  
41  
42  
43  
44  
45  
46  
47  
48  
49  
50  
51  
52  
53  
54  
55  
56  
57  
58  
59  
60

1  
2  
3  
4  
5  
6  
7  
8  
9  
10  
11  
12  
13  
14  
15  
16  
17  
18  
19  
20  
21  
22  
23  
24  
25  
26  
27  
28  
29  
30  
31  
32  
33  
34  
35  
36  
37  
38  
39  
40  
41  
42  
43  
44  
45  
46  
47  
48  
49  
50  
51  
52  
53  
54  
55  
56  
57  
58  
59  
60

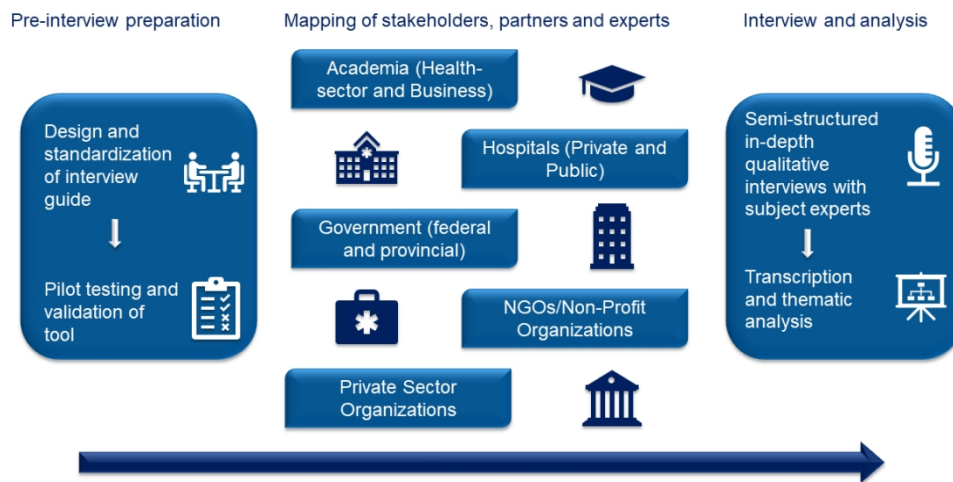

An overview of the methodological framework of the study – participant cohorts, process of interview preparation, conductance, and analysis

108x60mm (300 x 300 DPI)

## Semi-structured interview guide

### **Section 1 : Understanding the health data landscape for Pakistan**

**What type of health data exists in Pakistan?**

***Potential prompts in case of a brief reply***

- What type of data at a national/regional/global level supports your decision-making ability/research work?
- What type of health data would further support your ability to make informed decisions?
- Is health data at a Pakistan level accessible?
- Is health data at a Pakistan level of good quality? (define quality)

### **Section 2: Understanding the application of a gender and equity lens to data**

***Potential prompts in case of a brief reply (mostly guided by the interviewee's response)***

- Do we know how to apply a gender/equity lens to our data (disaggregation, analysis etc)
- What population group do you not frequently see available data about?

### **Section 3: Understanding the organizational handle on health data and its current role**

***Potential prompts in case of a brief reply (mostly guided by the interviewee's response)***

- What health data does your organization hold and to what level does your organization engage with the data for decision making.
- How equipped are organizations to manage the health data they hold?
- What kind of infrastructure/software does your organization have? Is it sufficient?

### **Section 4: Understanding perceptions around developing a health data science training program/curriculum**

**How effective do you think the introduction of a health data science training curriculum will be, to address barriers?**

***Potential prompts in case of a brief reply (mostly guided by the interviewee's response)***

- What type of training in data science would be most beneficial to you and why?
- What health data science curriculum/training programs exist and are useful?
- Do you think there's an existing need for development of such a program in Pakistan? Why or why not?
- What barriers should such a training program address?
- What components should the health data science training curriculum have?

1  
2  
3  
4  
5  
6  
7  
8  
9  
10  
11  
12  
13  
14  
15  
16  
17  
18  
19  
20  
21  
22  
23  
24  
25  
26  
27  
28  
29  
30  
31  
32  
33  
34  
35  
36  
37  
38  
39  
40  
41  
42  
43  
44  
45  
46  
47

### Consolidated criteria for reporting qualitative studies (COREQ): 32-item checklist

| No. Item                                       | Guide questions/description                                                                                                                 | Reported on Page # |
|------------------------------------------------|---------------------------------------------------------------------------------------------------------------------------------------------|--------------------|
| <b>Domain 1: Research team and reflexivity</b> |                                                                                                                                             |                    |
| <i>Personal Characteristics</i>                |                                                                                                                                             |                    |
| 1. Inter viewer/facilitator                    | Which author/s conducted the interview or focus group?                                                                                      | 7                  |
| 2. Credentials                                 | What were the researcher's credentials? E.g., PhD, MD                                                                                       | 8                  |
| 3. Occupation                                  | What was their occupation at the time of the study?                                                                                         | 8                  |
| 4. Gender                                      | Was the researcher male or female?                                                                                                          | 7                  |
| 5. Experience and training                     | What experience or training did the researcher have?                                                                                        | 8                  |
| <i>Relationship with participants</i>          |                                                                                                                                             |                    |
| 6. Relationship established                    | There was no personal relationship between interviewers                                                                                     | N/A                |
| 7. Participant knowledge of the interviewer    | What did the participants know about the researcher? e.g., personal goals, reasons for doing the research                                   | N/A                |
| 8. Interviewer characteristics                 | What characteristics were reported about the inter viewer/facilitator? e.g., Bias, assumptions, reasons and interests in the research topic | N/A                |
| <b>Domain 2: study design</b>                  |                                                                                                                                             |                    |
| <i>Theoretical framework</i>                   |                                                                                                                                             |                    |

|                                          |                                                                                                                                                           |     |
|------------------------------------------|-----------------------------------------------------------------------------------------------------------------------------------------------------------|-----|
|                                          |                                                                                                                                                           |     |
| 9. Methodological orientation and Theory | What methodological orientation was stated to underpin the study? e.g., grounded theory, discourse analysis, ethnography, phenomenology, content analysis | 9   |
| <i>Participant selection</i>             |                                                                                                                                                           |     |
| 10. Sampling                             | How were participants selected? e.g., purposive, convenience, consecutive, snowball                                                                       | 8   |
| 11. Method of approach                   | How were participants approached? e.g., face-to-face, telephone, mail, email                                                                              | 8   |
| 12. Sample size                          | How many participants were in the study?                                                                                                                  | 10  |
| 13. Non-participation                    | How many people refused to participate or dropped out? Reasons?                                                                                           | N/A |
| <i>Setting</i>                           |                                                                                                                                                           |     |
| 14. Setting of data collection           | Where was the data collected? e.g., home, clinic, workplace                                                                                               | 8   |
| 15. Presence of non-participants         | Was anyone else present besides the participants and researchers?                                                                                         | 8   |
| 16. Description of sample                | What are the important characteristics of the sample? e.g., demographic data, date                                                                        | 10  |
| <i>Data collection</i>                   |                                                                                                                                                           |     |
| 17. Interview guide                      | Were questions, prompts, guides provided by the authors? Was it pilot tested?                                                                             | 7   |
| 18. Repeat interviews                    | Were repeat inter views carried out? If yes, how many?                                                                                                    | N/A |
| 19. Audio/visual recording               | Did the research use audio or visual recording to collect the data?                                                                                       | 9   |

|                                        |                                                                                                                                     |       |
|----------------------------------------|-------------------------------------------------------------------------------------------------------------------------------------|-------|
| 20. Field notes                        | Were field notes made during and/or after the interview or focus group?                                                             | N/A   |
| 21. Duration                           | What was the duration of the inter views or focus group?                                                                            | 8     |
| 22. Data saturation                    | Was data saturation discussed?                                                                                                      | 8     |
| 23. Transcripts returned               | Were transcripts returned to participants for comment and/or correction?                                                            | N/A   |
| <b>Domain 3: analysis and findings</b> |                                                                                                                                     |       |
| <i>Data analysis</i>                   |                                                                                                                                     |       |
| 24. Number of data coders              | How many data coders coded the data?                                                                                                | 9     |
| 25. Description of the coding tree     | Did authors provide a description of the coding tree?                                                                               | N/A   |
| 26. Derivation of themes               | Were themes identified in advance or derived from the data?                                                                         | 9     |
| 27. Software                           | What software, if applicable, was used to manage the data?                                                                          | 9     |
| 28. Participant checking               | Did participants provide feedback on the findings?                                                                                  | N/A   |
| <i>Reporting</i>                       |                                                                                                                                     |       |
| 29. Quotations presented               | Were participant quotations presented to illustrate the themes/findings?<br>Was each quotation identified? e.g., participant number | 11-17 |
| 30. Data and findings consistent       | Was there consistency between the data presented and the findings?                                                                  | 10-17 |
| 31. Clarity of major themes            | Were major themes clearly presented in the findings?                                                                                | 10-17 |
| 32. Clarity of minor themes            | Is there a description of diverse cases or discussion of minor themes?                                                              | N/A   |

1  
2  
3  
4  
5  
6  
7  
8  
9  
10  
11  
12  
13  
14  
15  
16  
17  
18  
19  
20  
21  
22  
23  
24  
25  
26  
27  
28  
29  
30  
31  
32  
33  
34  
35  
36  
37  
38  
39  
40  
41  
42  
43  
44  
45  
46  
47

For peer review only

# BMJ Open

## Health Data Ecosystem in Pakistan – A Multi-sectoral Qualitative Assessment of Needs and Opportunities

|                                 |                                                                                                                                                                                                                                                                                                                                                                                                                                                                                                                                                                                                                                                                                                                                                                                                                                                                                                                 |
|---------------------------------|-----------------------------------------------------------------------------------------------------------------------------------------------------------------------------------------------------------------------------------------------------------------------------------------------------------------------------------------------------------------------------------------------------------------------------------------------------------------------------------------------------------------------------------------------------------------------------------------------------------------------------------------------------------------------------------------------------------------------------------------------------------------------------------------------------------------------------------------------------------------------------------------------------------------|
| Journal:                        | <i>BMJ Open</i>                                                                                                                                                                                                                                                                                                                                                                                                                                                                                                                                                                                                                                                                                                                                                                                                                                                                                                 |
| Manuscript ID                   | bmjopen-2023-071616.R2                                                                                                                                                                                                                                                                                                                                                                                                                                                                                                                                                                                                                                                                                                                                                                                                                                                                                          |
| Article Type:                   | Original research                                                                                                                                                                                                                                                                                                                                                                                                                                                                                                                                                                                                                                                                                                                                                                                                                                                                                               |
| Date Submitted by the Author:   | 20-Aug-2023                                                                                                                                                                                                                                                                                                                                                                                                                                                                                                                                                                                                                                                                                                                                                                                                                                                                                                     |
| Complete List of Authors:       | Mahmood, Sana; Aga Khan University; Aga Khan University, Department of Community Health Sciences<br>Noorali, Ali Aahil; The Aga Khan University<br>Manji, Afshan; Aga Khan University, Department of Medicine; Aga Khan University<br>Afzal, Noreen; The Aga Khan University<br>Abbas, Saadia; Aga Khan University, Department of Medicine<br>Qamar, Javeria Bilal; Aga Khan University, Department of Medicine<br>Siddiqi, Sameen; Aga Khan University Medical College Pakistan, Community Health Sciences Department<br>Hoodbhoy, Zahra; Aga Khan University, Department of Pediatrics and Child Health<br>Virani, Salim; Michael E. DeBakey Veterans Affairs Medical Center HSR&D, Health Policy, Quality & Informatics Program,<br>Bhutta, Zulfiqar; Hosp Sick Children, Centre for Global Child Health<br>Samad, Zainab; The Aga Khan University; Duke Clinical Research Institute, Department of Medicine |
| <b>Primary Subject Heading</b>: | Public health                                                                                                                                                                                                                                                                                                                                                                                                                                                                                                                                                                                                                                                                                                                                                                                                                                                                                                   |
| Secondary Subject Heading:      | Qualitative research                                                                                                                                                                                                                                                                                                                                                                                                                                                                                                                                                                                                                                                                                                                                                                                                                                                                                            |
| Keywords:                       | QUALITATIVE RESEARCH, PUBLIC HEALTH, Quality in health care < HEALTH SERVICES ADMINISTRATION & MANAGEMENT                                                                                                                                                                                                                                                                                                                                                                                                                                                                                                                                                                                                                                                                                                                                                                                                       |
|                                 |                                                                                                                                                                                                                                                                                                                                                                                                                                                                                                                                                                                                                                                                                                                                                                                                                                                                                                                 |

SCHOLARONE™  
Manuscripts





I, the Submitting Author has the right to grant and does grant on behalf of all authors of the Work (as defined in the below author licence), an exclusive licence and/or a non-exclusive licence for contributions from authors who are: i) UK Crown employees; ii) where BMJ has agreed a CC-BY licence shall apply, and/or iii) in accordance with the terms applicable for US Federal Government officers or employees acting as part of their official duties; on a worldwide, perpetual, irrevocable, royalty-free basis to BMJ Publishing Group Ltd ("BMJ") its licensees and where the relevant Journal is co-owned by BMJ to the co-owners of the Journal, to publish the Work in this journal and any other BMJ products and to exploit all rights, as set out in our [licence](#).

The Submitting Author accepts and understands that any supply made under these terms is made by BMJ to the Submitting Author unless you are acting as an employee on behalf of your employer or a postgraduate student of an affiliated institution which is paying any applicable article publishing charge ("APC") for Open Access articles. Where the Submitting Author wishes to make the Work available on an Open Access basis (and intends to pay the relevant APC), the terms of reuse of such Open Access shall be governed by a Creative Commons licence – details of these licences and which [Creative Commons](#) licence will apply to this Work are set out in our licence referred to above.

Other than as permitted in any relevant BMJ Author's Self Archiving Policies, I confirm this Work has not been accepted for publication elsewhere, is not being considered for publication elsewhere and does not duplicate material already published. I confirm all authors consent to publication of this Work and authorise the granting of this licence.

# Health Data Ecosystem in Pakistan – A Multi-sectoral Qualitative Assessment of Needs and Opportunities

**Authors:** Sana Mahmood EdM <sup>1,2,3</sup>, Ali Aahil Noorali MBBS <sup>4,5</sup>, Afshan Manji MSc <sup>4,5</sup>, Noreen Afzal MPhil <sup>1</sup>, Saadia Abbas <sup>4</sup>, Javeria Bilal Qamar <sup>4</sup>, Sameen Siddiqi DrMed <sup>2</sup>, Zahra Hoodbhoy PhD<sup>6</sup>, Salim S. Virani PhD<sup>7</sup>, Zulfiqar A. Bhutta, PhD <sup>3</sup>, Zainab Samad MHS <sup>3,4,8</sup>

## Affiliations:

<sup>1</sup> Dean's Office, Medical College, Aga Khan University, Karachi, Pakistan

<sup>2</sup> Department of Community Health Sciences, Aga Khan University, Karachi, Pakistan

<sup>3</sup> Institute of Global Health and Development, Aga Khan University, Karachi, Pakistan

<sup>4</sup> Department of Medicine, Medical College, Aga Khan University, Karachi, Pakistan

<sup>5</sup> CITRIC Health Data Science Center, Medical College, Aga Khan University, Karachi, Pakistan

<sup>6</sup> Department of Pediatrics and Child Health, Aga Khan University, Karachi, Pakistan

<sup>7</sup> Division of Cardiology, Department of Medicine, Baylor College of Medicine, USA

<sup>8</sup> Division of Cardiology, Department of Medicine, Duke University, Duke Global Health Institute, Duke Clinical Research Institute, Durham, NC

## Corresponding Author:

Zainab Samad, MBBS, MHS

Aga Khan University, Stadium Road, Karachi, Pakistan, 74800

Email: [samad.zainab@aku.edu](mailto:samad.zainab@aku.edu)

Phone: 03002017196

1  
2  
3  
4  
5  
6  
7  
8  
9  
10  
11  
12  
13  
14  
15  
16  
17  
18  
19  
20  
21  
22  
23  
24  
25  
26  
27  
28  
29  
30  
31  
32  
33  
34  
35  
36  
37  
38  
39  
40  
41  
42  
43  
44  
45  
46  
47  
48  
49  
50  
51  
52  
53  
54  
55  
56  
57  
58  
59  
60

**Word count:**

4,412 words

For peer review only

## Abstract

### Objective:

Data are essential for tracking and monitoring of progress on health-related sustainable development goals (SDGs). But the capacity to analyze subnational and granular data is limited in low- and middle-income countries. Although Pakistan lags behind on achieving several health-related SDGs, its health information capacity is nascent. Through an exploratory qualitative approach, we aimed to understand the current landscape and perceptions on data in decision making among stakeholders of the health data ecosystem in Pakistan.

### Design:

We used an exploratory qualitative study design.

### Setting:

This study was conducted at the Aga Khan University, Karachi, Pakistan.

### Participants:

We conducted semi-structured, in-depth interviews with multidisciplinary and multisectoral stakeholders from academia, hospital management, government, NGOs, and other relevant private entities till thematic saturation was achieved. Interviews were recorded and transcribed, followed by thematic analysis using NVivo.

### Results:

Thematic analysis of 15 in-depth interviews revealed three major themes: 1) Institutions are collecting data, but face barriers to its effective utilization for decision making. These include lack of collection of needs-responsive data, lack of a gender/equity in data collection efforts, inadequate digitization, data reliability, and limited analytical ability; 2) There is openness and enthusiasm for sharing data for advancing health, however, multiple barriers hinder this

1  
2  
3 including appropriate regulatory frameworks, platforms for sharing data, inter-operability, and  
4 defined win-win scenarios; 3) There is limited capacity in the area of both human capital and  
5 infrastructure, for being able to use data to advance health but there is appetite to improve and  
6 invest in capacity in this area  
7  
8  
9  
10  
11  
12  
13  
14

15 **Conclusions:**

16  
17 Our study identified key areas of focus that can contribute to orient a national health data  
18 roadmap and ecosystem in Pakistan.  
19  
20  
21  
22  
23  
24  
25  
26  
27  
28  
29  
30  
31  
32  
33  
34  
35  
36  
37  
38  
39  
40  
41  
42  
43  
44  
45  
46  
47  
48  
49  
50  
51  
52  
53  
54  
55  
56  
57  
58  
59  
60

### Strengths and limitations of this study

- Our study participants were experts and decision makers from multiple sectors, across provinces, and with work at the intersection of health and data science. In-depth interviews with key-informants allowed for a thorough exploration of the scope and challenges for health data science in Pakistan.
- We did not conduct patient interviews to learn about their opinions about the application of health data science in Pakistan.

## Introduction

Data are essential for tracking and monitoring progress on health-related sustainable development goals (SDGs).[1–3] While data and data analytics are being used in high income countries (HICs) to improve health equity, health outcomes, and continuously inform healthcare systems, their use in low-middle-income countries (LMICs) is lagging.[4–8] Investing in data ecosystems represents an important opportunity for monitoring and quickening progress on health-related SDGs in LMICs.[1,8–10]

With a population of 230 million, Pakistan, the fifth most populous LMIC, has a high estimated mortality and morbidity burden for various diseases, but its health system and health information system capacity is nascent.[11,12] However, during the COVID-19 pandemic, data were made nationally available in almost real-time, and data science methods were used to inform health policy and population level interventions such as smart lock downs and vaccinations efforts.[13,14] Multi-stakeholder and interprovincial collaboration underpinned this successful effort and highlighted the need for a national health data ecosystem outside of crisis situations. To inform such future efforts, an understanding of the current perceptions around health data, its use in decision making and the health data ecosystem in Pakistan is required. To this end, we adopted a qualitative approach to understand the current landscape as well as perceptions on data in decision-making among a wide range of stakeholders.

## Methods

### Study Design and Setting:

This was an exploratory qualitative study with the primary objectives to comprehend the scope of the health data ecosystem in Pakistan, knowledge and attitudes around developing partnerships and sharing data, and perceptions around the need for developing health data science capacity in Pakistan.

The study was led by investigators at the Aga Khan University (AKU) in Pakistan. With a forty-year presence in Pakistan, AKU has well established partnerships at both provincial and national levels, with government and academia, enabling regular engagement in interdisciplinary policy discussions and fora.

### Study instrument:

A semi-structured interview guide was designed using carefully curated questions (available in supplement 1). The guide prompted a detailed discussion on the landscape and scope of existing health data. Further discussion was rooted in potential facilitators and barriers to building a national health data collaborative that would contribute to improved health outcomes in Pakistan.

This included understanding the nature of existing policies and collaboratives, the availability and need of human capital for health data initiatives, and structures—from governance to infrastructure, which were present or would need to be developed and implemented to allow for organizations across sectors to comfortably share data to advance health outcomes in Pakistan.

The guide was pilot-tested among a diverse cohort of four individuals and judged for clarity of questions. Feedback from the pilot testing was incorporated to address gaps in the interview



1  
2  
3  
4 guide. Interviews were conducted by two female investigators (ZS and SM), who were the  
5  
6  
7 departmental chair and director, respectively, while the research staff (AAN, AA, SA, JBQ)  
8  
9  
10 acted as observers. Standardization was maintained across all interviews by ensuring that the  
11  
12  
13 same two interviewers conducted all the interviews with the same guide. Both interviewers had  
14  
15  
16 prior experience of conducting qualitative interviews. Each interview was conducted online for a  
17  
18  
19 duration that varied between 30 minutes and 2 hours.  
20  
21  
22  
23  
24

### 25 **Sampling, Inclusion and Exclusion Criteria:**

26  
27  
28 A scoping exercise was conducted to identify experts and relevant institutions. Through  
29  
30 discussion, the investigators collectively identified key sectors in the health ecosystem of  
31  
32 Pakistan for a landscape analysis which formed the inclusion criteria: 1. University and academia  
33  
34 with faculty in health and/or information technology (IT), 2. Senior-level hospital management  
35  
36 (both private and public) 3. Government ministers (federal and provincial/state), 4. Non-  
37  
38 governmental organizations (NGOs) and 5. Private-sector organizations (pharmaceutical,  
39  
40 finance, and health insurance sectors). There were no major or minor exclusion criteria.  
41  
42  
43

44 Based on the SDGs 4, 5 and 9 [15] (quality education, gender equality and industry, innovation  
45  
46 and infrastructure respectively), we performed a mapping of major institutions across these  
47  
48 domains in the public and private health sectors, private organizations and NGOs. Major  
49  
50 institutions were defined as those that were expected to have organizational maturity and scale in  
51  
52 the area and capacity to collect data. Lastly, individuals with at least five years of leadership  
53  
54 experience in their respective domains were eligible to participate in the study.  
55  
56  
57

1  
2  
3 Following convenience sampling to select key stakeholders with a particular focus on those with  
4 management/decision-making roles, invites were extended via email, and interviews were  
5  
6 arranged. Thematic saturation was reached at 15 interviews which comprised the final study  
7  
8 sample. Figure 1 illustrates the study methodology.  
9  
10  
11  
12  
13

### 14 **Data Analysis:**

15  
16 Grounded theory and the six-step method of thematic analysis of Braun and Clarke (2006)  
17  
18 guided the analytical process.[16] Interviews were first audio recorded and transcribed verbatim.  
19  
20 Since the research staff were not only observers, but also transcribers for the interviews, these  
21  
22 roles helped them get familiarized and immersed with the collected data. Transcripts were  
23  
24 imported into NVivo (version 12). An initial list of a priori codes was used by two research team  
25  
26 members (AAN and AM) to code the transcripts. New codes emerging from the data, which  
27  
28 were deemed relevant to the study objectives were also added to this list. This codebook was  
29  
30 refined through iteration and consensus among research staff which helped in standardization of  
31  
32 the codes applied in all transcripts.  
33  
34  
35  
36

37  
38 Data coded under similar codes were then grouped to identify major themes, which were paired  
39  
40 with direct verbatim quotations from the interviewees. The themes were then reviewed to ensure  
41  
42 adequate data and participant quotations supported the creation of each theme. All themes were  
43  
44 then defined to convey an adequate description of its subthemes and relevant data. Lastly, the  
45  
46 results were written in a format to describe the analyzed data in detail.  
47  
48  
49  
50

### 51 **Patient and Public Involvement**

52  
53  
54  
55  
56  
57

1  
2  
3 Patients and the public were not involved in the research design, analysis, and dissemination of  
4  
5 the findings.  
6  
7  
8  
9

### 10 **Ethical Considerations:**

11  
12 The study received approval from the Ethical Review Committee at AKU (ERC # 2021-5839-  
13  
14 16883). Written informed consent over email for the study was obtained from each participant  
15  
16 before starting the interview.  
17  
18  
19  
20

### 21 **Results**

22  
23 We conducted 15 in-depth interviews with a diverse range of stakeholders from five centralized  
24  
25 cohorts. Sector and designation of the participants are described in Table 1. Thematic analysis  
26  
27 generated three overarching themes: 1) Institutions are collecting data, but face barriers to its  
28  
29 effective utilization for decision making. These include lack of collection of needs-responsive  
30  
31 data, lack of a gender/equity in data collection efforts, inadequate digitization, data reliability,  
32  
33 and limited analytical ability.; 2) There is openness and enthusiasm for sharing data for  
34  
35 advancing health, however, multiple barriers hinder this endeavor; 3) There is limited capacity in  
36  
37 the area of both human capital and infrastructure, for being able to use data to advance health but  
38  
39 there is appetite to improve capacity in this area.  
40  
41  
42  
43  
44

| 45 <b>Table 1: Sector and designation of study</b> |                 |
|----------------------------------------------------|-----------------|
| 46 <b>participants (n=15)</b>                      |                 |
| 47 <b>Sector</b>                                   | 48 <b>N (%)</b> |
| 49 Academia                                        | 1               |
| 50 Hospitals                                       | 2               |
| 51 Government                                      | 3               |
| 52 Non-governmental organizations (NGOs)           | 3               |
| 53 Private-sector organizations                    | 6               |
| 54                                                 |                 |
| 55                                                 |                 |
| 56 <b>Designation</b>                              |                 |

|                       |   |
|-----------------------|---|
| Mid-level management  | 5 |
| Chief medical officer | 2 |
| Health minister       | 2 |
| Senior management     | 6 |

**Theme 1: Institutions are collecting data, but face barriers to its effective utilization for decision making. These include lack of collection of needs-responsive data, lack of gender/equity in data collection efforts, inadequate digitization, data reliability and limited analytical ability.**

Experts communicated that there are several initiatives at the intersection of health and data, and organizations are collecting and holding data, but these initiatives exist in silos. Institutions have a large volume of operational data, but several barriers to their effective utilization were identified. These ranged from lack of collection of needs-responsive data (data not capturing variables required for decision making, interventions and policy reform), inadequate digitization, inappropriate data formats, data reliability, value placed on ultimate data use by data collectors, and human capacity to gauge scientific insights from it.

Inadequate data mapping and lack of dataset awareness within institutions affecting access and use were identified as barriers. An expert in digital health strategy noted that *“I would think that the dissemination of the data is a far bigger issue than the data holes being there. So, if you start digging, you find data sets, but you see that no one is aware of them, even though a lot of activity has happened”*.

Leaders identified lack of needs-responsive data collection as a barrier to effective utilization of data for decision making. A provincial health minister stated that, *“We find that getting population level information is really difficult. And you can get this information, but it's not*

1  
2  
3 *really formalized - you just hear verbal estimates. So, in terms of planning, there is no common*  
4 *information base that people have that is like the gold standard".* In a similar vein, a leader in a  
5  
6 *prominent healthcare institution noted, "There are very few hospitals in Pakistan that actually*  
7 *record quality and patient safety data. So, hospital quality level data, the kind that exists in the*  
8 *NHS, or in the US etc. doesn't exist here".* In addition, most participants noted that gender and  
9  
10 *equity lens have not been widely considered, neither during the collection and analysis of health*  
11 *data, nor in the design of research and data driven initiatives. With regards to gender, a leader at*  
12 *a non-profit organization explained that: "Disaggregated data by gender is probably a large*  
13 *problem nationally, particularly with development indicators".* Equity is often overlooked in  
14  
15 *conversations around data, and when considered, the level of commitment is inadequate. A*  
16 *governmental leader mentioned that: "Unfortunately, I think equity is more a function of*  
17 *conversations with development partners. And it does translate to some commitment, but not the*  
18 *level of commitment that should be the case".*

19  
20  
21  
22  
23  
24  
25  
26  
27  
28  
29  
30  
31  
32  
33  
34 The digitization and structure of available data is another holdup, as stated by a manager at a  
35 non-governmental organization: *"Some organizations don't have data in a format that's easily*  
36 *accessible, because they don't have electronic systems".* Most participants shared the perception  
37  
38 that there is a lack of an appropriately designed system to help collate data to its most desired  
39  
40 format. This sentiment was shared by another expert in epidemiology at a tertiary care hospital,  
41  
42 who noted that, *"The reality was when I came in, I realized that the structure of the data being*  
43 *collected, was not conducive to be pulled out, right, so we couldn't do any research".* Another  
44  
45 expert at an NGO noted, *"When I joined X organization, all this information was collected on*  
46 *different platforms, some of this was paper based, some of it was collected with in-house*  
47  
48  
49  
50  
51  
52  
53  
54  
55  
56  
57  
58  
59  
60

1  
2  
3 *applications. And none of it was necessarily standards-based. And none of these applications*  
4 *were well designed for information sharing”.*  
5  
6  
7

8  
9 Data reliability was another aspect highlighted in the interviews. Specifically in the context of  
10 data sharing, a leader at an NGO noted, “*You get conflicting information....who is going to verify*  
11 *whether database A is correct or database B is correct”.*  
12  
13  
14

15  
16  
17 A provincial minister also suggested that while data-driven initiatives do exist, there is  
18 sometimes lack of clarity regarding the purpose and objectives of successfully collecting data  
19 and ultimately the value attached to these efforts among those collecting and managing this  
20 information. “*We tried to give the lady health workers an app to update in real time to update*  
21 *the data about the diseases that they are seeing and the pregnant women that they are seeing. We*  
22 *don't have a proper accountability system and so we cannot tell people that this is something*  
23 *important for health policy and interventions and for a database for knowledge”.*  
24  
25  
26  
27  
28  
29  
30  
31  
32  
33

34 Many interviewees felt that where data did exist, there were other obstacles like significant  
35 deficits in staffing and the inability to utilize the collected data. A leader in an NGO noted, “*We*  
36 *do not have trained people in the system, even people who have dealt with data for a long time,*  
37 *do not have the analytical skills to make sense of it, draw conclusions, and ask questions. That*  
38 *has been a real challenge”.*  
39  
40  
41  
42  
43  
44  
45  
46  
47  
48

49 **Theme 2: There is openness and enthusiasm for sharing data for advancing health,**  
50 **however, multiple barriers hinder this including appropriate regulatory frameworks,**  
51 **platforms for sharing data, inter-operability, and defined win-win scenarios**  
52  
53  
54  
55  
56  
57

1  
2  
3 Considering a shared vision to improve health outcomes in Pakistan, leaders indicated overall  
4 willingness to share data and partner for this common mission, expressing keen interest and  
5  
6 stating their openness to proposals and collaborations. Defining win-win scenarios, in terms of  
7  
8 shared objectives between entities and learning from each other's areas of expertise would be  
9  
10 critical to organizations sharing data, as a government leader observed: *"I think we are open to*  
11  
12 *proposals where, say, we make data in specific areas available. As long as we get something in*  
13  
14 *return - if I can get more immediate impact out of that process, then that would excite me more.*  
15  
16 *So, you name an area where we can problem-solve, and we can actually close the loop on that*  
17  
18 *partnership (in terms of how we can actually translate it to some impact)".* Interestingly, an  
19  
20 epidemiologist at a tertiary care hospital shared insights about ensuring that a shared  
21  
22 collaborative keeps 'democracy of data' as a central guiding principle: *"I think there has to be*  
23  
24 *democracy of data sharing within an organization because there's no point hanging on to data,*  
25  
26 *and not sharing it so that somebody can make use of it, and that is one of the problems; people*  
27  
28 *hang on to data as a good treasure that they cannot share with anybody".*

29  
30  
31  
32  
33  
34  
35  
36 Most experts shared that certain challenges and pertinent questions would need to be accounted  
37  
38 for to build a sustainable, shared, accessible data ecosystem. These include the validity and  
39  
40 accuracy of datasets themselves, privacy and regulatory framework around data sharing,  
41  
42 addressing systemic differences between different sectors and inadequate workforce and training.  
43  
44  
45 Experts shared that even if the data exists, dissemination of data is always an issue because data  
46  
47 governance is a nascent field in Pakistan. The term governance is also used broadly by  
48  
49 interviewees that use it to refer to privacy and security of data as well as an overarching  
50  
51 governing structure to establish appropriate ownership of data. An entity leader, at a premier  
52  
53 bank, noted that this also holds true for other sectors of Pakistan, such as the well-resourced  
54  
55  
56  
57

1  
2  
3 finance sector, where one of the country's largest banks is still working through the early stages  
4 of data governance. Furthermore, structuring a data system to be useful requires understanding  
5 what data fields one has in their database, what should go into those data fields, and a system that  
6 is designed to ensure a clear utilitarian purpose. Though governance appears to be a major barrier  
7 for a data collaborative, subjects report that missing-ness and access to data are also impediments  
8 to utilization.  
9

10  
11  
12 A manager and planning executive at a bank, noted: *"Some concerns in data sharing include*  
13 *who will own the data, what will be done with the data? Will the data remain valid or not, will*  
14 *transparency be maintained, privacy rules will be followed or not, ownership of the data? Where*  
15 *will data be used ultimately"*.  
16

17  
18 Similarly, a chief medical officer at a tertiary hospital mentioned that: *"There needs to be a lot*  
19 *more structure put into data sharing, and by structure, what I mean is that rules and regulations*  
20 *(which need to be set up a priori). That will really give confidence to individual institutions and*  
21 *individuals who own that data - that their data is going to be used properly, reliably and*  
22 *honestly"*.  
23  
24

25  
26 Interoperability of data sets was reported as a big challenge due to differences in dataset formats  
27 and different data capacity/skills across different institutions and across public and private  
28 institutions. Issues of interoperability are further pronounced when complemented with  
29 differences in the approach of private vs public sectors and inpatient vs outpatient data. A leader  
30 in healthcare administration while describing the public sector healthcare stated that *"Record*  
31 *keeping is something that is very poor there. In-patient record keeping is there, but there is*  
32 *nothing for out-patients at all. The private sector does keep the record, but the public sector does*  
33 *not. But the private sector does not share that data at all"*.  
34  
35  
36  
37  
38  
39  
40  
41  
42  
43  
44  
45  
46  
47  
48  
49  
50  
51  
52  
53  
54  
55  
56  
57  
58  
59  
60



1  
2  
3  
4  
5 **Theme 3: There is limited capacity in the area of both human capital and infrastructure,**  
6 **for being able to use data to advance health but there is appetite to improve and invest in**  
7 **capacity in this area**  
8  
9  
10

11 Inadequate human resources in data management and analytical skills in organizations was  
12 identified as a major barrier to both effective internal use of data and external collaborative data  
13 sharing efforts. Participants remarked that data sharing through a collaborative, would require  
14 capacity-building in this area.  
15  
16  
17  
18  
19  
20

21  
22  
23 A manager at an NGO noted: *“The issue is not whether people are willing to share data. But*  
24 *certain organizations, traditional non-profit ones for example, don’t have data teams or data*  
25 *managers (because of cost budgetary constraints). So, I think that these organizations often*  
26 *don’t have the capacity to manage data”*. It was also mentioned that lack of capacity building  
27 was a barrier to successfully analyzing and synthesizing data, where many healthcare facilities at  
28 the district level were still using a paper-based format for recording data since their staff were  
29 not proficient in the use of technology. A provincial healthcare leader noted: *“The main problem*  
30 *here is that we don’t have an HR [human resource] there or a proper computerized system there*  
31 *to log in that data and upload it. We have a lot of restrictions in the IT department”*. Similarly, a  
32 senior leader at a tertiary care hospital mentioned: *“We have the data, but we don’t have the*  
33 *capacity and capability to analyze it and make changes in healthcare”*. There was a clear  
34 appetite and keen interest in investing organizational data capacity ranging from investing in  
35 needs-responsive data repositories and electronic systems, to upskilling the current workforce. A  
36  
37  
38  
39  
40  
41  
42  
43  
44  
45  
46  
47  
48  
49  
50  
51  
52  
53  
54  
55  
56  
57  
58  
59  
60

1  
2  
3  
4 representative from academia shared their experience of setting up a data repository and its  
5  
6  
7 potential future impact: *“The long-term objective of this Higher Education Data Repository*  
8  
9  
10 *initiative is that we collect all the granular information throughout a student's life cycle. This will*  
11  
12  
13 *generate a lot of data for analysis, about what kind of educational needs we have in our system,*  
14  
15  
16 *what kind of courses do we need to specialize in for our students and the areas that our faculty*  
17  
18 *members need to specialize in”.*

21  
22 A representative from a large public sector tertiary care hospital reported their initiative of data  
23  
24 automation and the barriers associated with it, notably, administrative and financial challenges  
25  
26 around staffing plans: *“ We have begun an initiative at our hospital, where we are starting to do*  
27  
28 *automation of the data and that is happening but I really wouldn't be able to say to what extent*  
29  
30 *we have been successful with that. The data is within the automation center with the HR. That is*  
31  
32 *also not working because our staffing there has been rejected”.* This highlights the multifaceted  
33  
34 nature of this dilemma – while some initiatives may be headed in the right direction, approvals to  
35  
36 enact and sustain those initiatives are met with challenges.

37  
38  
39  
40  
41 An NGO leader described the process, components, and importance of building a data-driven  
42  
43 team – a cohesive unit of trained individuals that understand the application of data sciences to  
44  
45 health. He stated: *“There are four skills that I think are important in building out a data team*  
46  
47 *that we found. One is data engineering, which is just someone who can query databases,*  
48  
49 *particularly complex databases...Then, I think the next skill that we found useful is analytics,*  
50  
51 *which is how to develop dashboards. And that is a very easily trainable skill. So, the third skill*  
52  
53 *that's (commonly) not there is knowing what dashboard to make. And the fourth skill is data*  
54  
55  
56  
57

1  
2  
3 *science, which is basically being able to model data and that's an even rarer skill especially*  
4  
5 *locally”.*  
6

7  
8 A key skill within building capacity to manage and analyze data is the ability to effectively  
9  
10 communicate results. A government health leader also delineated the importance of  
11  
12 communication in building health data capacity which may be an essential, yet neglected, skill.  
13

14  
15 After data collection and analysis, the success of any subsequent policy and prevention measures  
16  
17 depended largely on how they are communicated to people. She stated that, *“There must be a*  
18  
19 *trigger factor that allows the person to do a communications strategy and awareness policy to*  
20  
21 *send that message across. I think communication is very important. You specifically need to*  
22  
23 *know how to communicate”.*  
24

25  
26 A Government leader also stated the need for and importance of on-the-job training by stating  
27  
28 that *“For me, the single silver bullet is creating data management routines that act as on the job*  
29  
30 *training for managers”.* He added, *“... you need a data boot camp for health leaders, like that is*  
31  
32 *weeklong. And that is sort of morning to night. And that's trying to basically break their thinking*  
33  
34 *and get them to use differently the information that is available, because there is still a lot more*  
35  
36 *information that is available”.*  
37  
38  
39  
40  
41  
42  
43  
44

## 45 **Discussion**

46  
47 Our study is the first, multi-disciplinary endeavor to understand perceptions on health data and  
48  
49 health data science in Pakistan. The main finding from our qualitative analysis is that the scope  
50  
51 of data science in health for advancing health outcomes, is far-reaching in Pakistan and likely in  
52  
53 other LMICs where organizations have collected a great deal of data but are in the early stages of  
54  
55  
56  
57  
58  
59  
60

1  
2  
3 understanding how best to leverage and utilize this data. Furthermore, there is potential for  
4  
5 establishing a health data ecosystem comprised of a health data collaborative with an appropriate  
6  
7 governance structure, intentionality toward data design elements focusing on gender, equity, and  
8  
9 needs-responsiveness, that is supported by appropriate capacity building initiatives. Our study  
10  
11 findings suggest that while we are at nascent stages of using data to progress a national health  
12  
13 agenda, several independent and national efforts are being made to allow for digitization and  
14  
15 automation in healthcare and there is keen interest in investment in building capacity in this area.  
16  
17 Even though the far-reaching scope of health data and data science methods in healthcare and  
18  
19 their potential benefits are recognized by developing countries, development of a national data  
20  
21 collaborative that might serve as a foundational block of a larger health data ecosystem is a  
22  
23 complex endeavor and presents some challenges.[10] A principal lever for this agenda is timely  
24  
25 access to the right information, but this has been a scarce resource in LMICs.[17]  
26  
27 Lack of rigorous and structured systems, problems with accuracy, credibility and completeness,  
28  
29 inadequacy of trained personnel with core competencies, and unavailability of analytic tools  
30  
31 were core obstacles highlighted by experts. Furthermore, there are very limited efforts to  
32  
33 propagate a multimodal, multisectoral, and multidisciplinary approach to data, leading to a  
34  
35 conspicuous lack of a central repository of information in LMICs like Pakistan.[8] In line with  
36  
37 recent literature, a key concern highlighted by participants in data sharing was safeguarding their  
38  
39 privacy, confidentiality, and security, with all interviewees agreeing to the need of a governance  
40  
41 and regulatory framework being set up a priori to ensure data transparency and maintaining the  
42  
43 trust of all parties involved that their data will be used honestly and reliably.[8,18]  
44  
45 Our participants also stated that the analysis, design, and collection of health data does not  
46  
47 currently support gender and equity lens as the core of any organization. Disaggregation of data  
48  
49  
50  
51  
52  
53  
54  
55  
56  
57  
58  
59  
60

1  
2  
3 by gender is a problem nationally and is difficult to find. Literature suggests that health system  
4  
5 policy development does not always pay adequate attention to gender and even when policies do  
6  
7 include gender, intentions can evaporate when it comes to actual implementation.[19,20] Study  
8  
9 participants suggested that equity was often a function of conversation with development  
10  
11 partners and that the level of commitment to inclusion of equity needed to be increased.  
12  
13

14 Tannenbaum et al. and The World Bank note that gender data is a powerful tool for improving  
15  
16 lives as lack of disaggregated gender information has resulted in an incomplete disease  
17  
18 understanding.[21,22] Furthermore, gender equity is an integral component of social  
19  
20 responsibility and according to International Organization for Standardization (ISO) 26000  
21  
22 Sustainable Development Goal 5 (Guidance on Social Responsibility), whereby the standard  
23  
24 denotes the importance of having gender-inclusive leadership and governance in ensuring  
25  
26 elimination of gender bias and promotion of gender parity.[23]  
27  
28

29  
30 Our study participants mentioned how organizations collect and store data, have information  
31  
32 management systems, but that data is not being utilized in the most effective way, due to limited  
33  
34 capacity and skillsets. [24] Hence, they emphasized that translation and evidence synthesis  
35  
36 require significant capacity building. A systematic review reflects on the importance of ongoing  
37  
38 training and multilevel strategies needed in development of such programs, and how capacity  
39  
40 building can influence different levels of entire organizations and systems.[25] The types of  
41  
42 interventions assessed included internet-based teaching and workshops. The results of a  
43  
44 worldwide cross-sectional survey by Kaggle et. al, illustrates the extent to which companies in  
45  
46 various countries have adapted to machine learning models, with Israel surpassing even the  
47  
48 United States.[26] This need also represents an opportunity to develop local, contextual health  
49  
50  
51  
52  
53  
54  
55  
56  
57  
58  
59  
60

1  
2  
3 data science programs that equip individuals with appropriate data management and data  
4  
5 analytics skills. [27]  
6

7  
8 A national strategy on establishing a robust health data ecosystem and data collaborative for  
9  
10 Pakistan will be an important next step. This necessitates that the gaps identified globally and in  
11  
12 our qualitative interviews are bridged and data are put into action. In this regard, a national  
13  
14 health digital framework has recently been developed by the Ministry of Health, which can be  
15  
16 used for developing a high-level roadmap. As noted by healthcare experts, the roadmap is to  
17  
18 help healthcare professionals use data science principles to inform decision making, uplifting  
19  
20 research, and guiding clinical approaches to improve healthcare delivery.[28,29]  
21  
22

23  
24 This study has a few limitations. Our findings mainly stemming from interviews among leaders  
25  
26 in the healthcare system of Pakistan do not provide such larger room for generalizability beyond  
27  
28 the Global South. However, we present perspectives from a low resource setting which has  
29  
30 contextual relevancy and implications for other LMICs in the region. Qualitative interviews  
31  
32 focused on perspectives from key management leads at major institutions. This was primarily  
33  
34 because the scope and objectives of this exercise were to assimilate input from experts and  
35  
36 leaders in management, policy, and healthcare. A next step, on establishing a health data  
37  
38 collaborative, will be to ensure data and perspectives from patients and communities, who serve  
39  
40 as key stakeholders in healthcare systems.  
41  
42  
43  
44  
45  
46

## 47 **Conclusion**

48  
49 The present study highlights important opportunities and barriers that need to be addressed to  
50  
51 develop a health data ecosystem in Pakistan. Creation of appropriate governance, regulatory  
52  
53 frameworks, gender, and equity indicators, and defining win-win scenarios, are important  
54  
55  
56  
57

1  
2  
3 principles to consider for planning any national health data collaboratives. To enable this  
4  
5 ecosystem, collaboration is required on strategic outlining of how data can be collated,  
6  
7 organized, curated, updated, and finally pipelined. For achieving this goal, building data science  
8  
9 capacity within organizations would be critical, thus providing the ability to leverage health data  
10  
11 to its full potential for informed decision making.  
12  
13  
14  
15

### 16 17 **Contributors**

18  
19 All authors confirm that they had full access to all the data in the study and accept responsibility  
20  
21 to submit for publication.  
22

23  
24 ZS conceived of, designed the study, collected data, and acquired funding.  
25

26  
27 SM collected the data and wrote the original draft of the manuscript.

28  
29 AAN analyzed and interpreted the data and wrote the original draft of the manuscript.

30  
31 AM analyzed and interpreted the data and wrote the original draft of the manuscript.

32  
33 NA wrote the original draft of the manuscript.

34  
35 SA was involved in data curation and manuscript writing.

36  
37 JQB was involved in data curation and manuscript writing.

38  
39 SS wrote the original draft of the manuscript.

40  
41 ZH wrote the original draft of the manuscript.

42  
43 ZAB wrote the original draft of the manuscript.

44  
45 SSV wrote the original draft of the manuscript.

46  
47 All authors contributed to critically reviewing and editing the manuscript.  
48

### 49 50 51 **Declaration of interests**

1  
2  
3 Dr Zainab Samad reports research grant support from the NIH-Fogarty International Center for  
4 the AKUPI-NCDs Research training program (Project Number 5D43TW011625-02) and  
5  
6  
7 UZIMA DS (U54TW012089); the NIHR, UK for the Centre for IMPACT (NIHR203248); Bill  
8  
9  
10 & Melinda Gates Foundation (INV 021944 & INV 050389); and Duke University.

11  
12 Dr Salim S. Virani MD, PhD, FACC, FAHA, FASPC Research support: U.S. Department of  
13  
14 Veterans Affairs, National Institutes of Health, World Heart Federation, Tahir and Jooma  
15  
16 Family; Honorarium: American College of Cardiology American College of Cardiology  
17  
18 (Associate Editor for Innovations, acc.org); Associate Editor (Current Atherosclerosis Reports,  
19  
20 Current Cardiology reports, Journal of Clinical Lipidology)  
21  
22

23  
24 Dr Zulfiqar Bhutta MBBS, FRCPCH, FAAP, PhD Executive Director of NCD Child  
25  
26  
27  
28  
29

### 30 31 **Funding**

32  
33 This work was supported through a grant from the Bill & Melinda Gates Foundation (grant  
34  
35 number: INV-021944).  
36  
37  
38  
39

### 40 41 **Data availability statement**

42  
43 No data are available.  
44  
45  
46

### 47 48 **Ethics approval**

49  
50 The study received approval from the Ethical Review Committee at AKU (ERC # 2021-5839-  
51  
52 16883).  
53

### 54 55 **License statement**



1  
2  
3 I, the Submitting Author has the right to grant and does grant on behalf of all authors of the  
4 Work (as defined in the below author license), an exclusive license and/or a non-exclusive  
5 license for contributions from authors who are: i) UK Crown employees; ii) where BMJ has  
6 agreed a CC-BY license shall apply, and/or iii) in accordance with the terms applicable for US  
7 Federal Government officers or employees acting as part of their official duties; on a worldwide,  
8 perpetual, irrevocable, royalty-free basis to BMJ Publishing Group Ltd (“BMJ”) its licensees and  
9 where the relevant Journal is co-owned by BMJ to the co-owners of the Journal, to publish the  
10 Work in BMJ Open and any other BMJ products and to exploit all rights, as set out in our  
11 license.  
12  
13  
14  
15  
16  
17  
18  
19  
20  
21  
22  
23

24 The Submitting Author accepts and understands that any supply made under these terms is made  
25 by BMJ to the Submitting Author unless you are acting as an employee on behalf of your  
26 employer or a postgraduate student of an affiliated institution which is paying any applicable  
27 article publishing charge (“APC”) for Open Access articles. Where the Submitting Author  
28 wishes to make the Work available on an Open Access basis (and intends to pay the relevant  
29 APC), the terms of reuse of such Open Access shall be governed by a Creative Commons license  
30 – details of these licenses and which Creative Commons license will apply to this Work are set  
31 out in our license referred to above.  
32  
33  
34  
35  
36  
37  
38  
39  
40  
41  
42  
43  
44  
45  
46

### 47 **Figure legend**

48  
49 Figure 1: An overview of the methodological framework of the study – participant cohorts,  
50 process of interview preparation, conductance, and analysis  
51  
52  
53  
54  
55  
56  
57

## References

- 1 Measuring progress from 1990 to 2017 and projecting attainment to 2030 of the health-related Sustainable Development Goals for 195 countries and territories: a systematic analysis for the Global Burden of Disease Study 2017. *Lancet (London, England)* 2018;**392**:2091–138. doi:10.1016/S0140-6736(18)32281-5
- 2 Transforming our world: the 2030 Agenda for Sustainable Development | Department of Economic and Social Affairs. <https://sdgs.un.org/2030agenda> (accessed 21 Nov 2022).
- 3 Sachs JD, Schmidt-Traub G, Mazzucato M, *et al*. Six Transformations to achieve the Sustainable Development Goals. *Nat Sustain* 2019 29 2019;**2**:805–14. doi:10.1038/s41893-019-0352-9
- 4 Bhavnani SP, Muñoz D, Bagai A. Data Science in Healthcare: Implications for Early Career Investigators. *Circ Cardiovasc Qual Outcomes* 2016;**9**:683–7. doi:10.1161/CIRCOUTCOMES.116.003081
- 5 Sharma A, Harrington RA, McClellan MB, *et al*. Using Digital Health Technology to Better Generate Evidence and Deliver Evidence-Based Care. *J Am Coll Cardiol* 2018;**71**:2680–90. doi:10.1016/j.jacc.2018.03.523
- 6 Ting DSW, Carin L, Dzau V, *et al*. Digital technology and COVID-19. *Nat Med* 2020 264

- 2020;**26**:459–61. doi:10.1038/s41591-020-0824-5
- 7 Imoto S, Hasegawa T, Yamaguchi R. Data science and precision health care. *Nutr Rev* 2020;**78**:53–7. doi:10.1093/nutrit/nuaa110
- 8 Bezuidenhout L, Chakauya E. Hidden concerns of sharing research data by low/middle-income country scientists. *Glob Bioeth = Probl di Bioet* 2018;**29**:39–54. doi:10.1080/11287462.2018.1441780
- 9 Wyber R, Vaillancourt S, Perry W, *et al.* Big data in global health: improving health in low- and middle-income countries. *Bull World Health Organ* 2015;**93**:203–8. doi:10.2471/BLT.14.139022
- 10 Naseem M, Akhund R, Arshad H, *et al.* Exploring the Potential of Artificial Intelligence and Machine Learning to Combat COVID-19 and Existing Opportunities for LMIC: A Scoping Review. *J Prim Care Community Health* 2020;**11**:2150132720963634. doi:10.1177/2150132720963634
- 11 Brief on Census -2017 | Pakistan Bureau of Statistics. <https://www.pbs.gov.pk/content/brief-census-2017> (accessed 21 Nov 2022).
- 12 Roth GA, Abate D, Abate KH, *et al.* Global, regional, and national age-sex-specific mortality for 282 causes of death in 195 countries and territories, 1980–2017: a systematic analysis for the Global Burden of Disease Study 2017. *Lancet* 2018;**392**:1736–88. <http://www.thelancet.com/article/S0140673618322037/fulltext> (accessed 21 Nov 2022).
- 13 Akhtar H, Afridi M, Akhtar S, *et al.* Pakistan’s Response to COVID-19: Overcoming National and International Hypes to Fight the Pandemic. *JMIR Public Heal Surveill* 2021;**7**. doi:10.2196/28517

- 1  
2  
3 14 Haq IU, Rehman ZU. Medical Research in Pakistan; A Bibliometric Evaluation from 2001  
4 to 2020. *Libr Philos Pract (e-journal)*<https://www.pmc.gov.pk/> (accessed 9 Dec 2022).  
5  
6  
7  
8 15 THE 17 GOALS | Sustainable Development. <https://sdgs.un.org/goals> (accessed 5 Jul  
9 2023).  
10  
11  
12 16 Braun V, Clarke V. Thematic analysis. *APA Handb Res methods Psychol Vol 2 Res Des*  
13 *Quant Qual Neuropsychol Biol* 2012;:57–71. doi:10.1037/13620-004  
14  
15  
16  
17 17 Harrison K, Rahimi N, Danovaro-Holliday MC. Factors limiting data quality in the  
18 expanded programme on immunization in low and middle-income countries: A scoping  
19 review. *Vaccine* 2020;38:4652–63. doi:10.1016/j.vaccine.2020.02.091  
20  
21  
22  
23  
24 18 Tiffin N, George A, LeFevre AE. How to use relevant data for maximal benefit with  
25 minimal risk: digital health data governance to protect vulnerable populations in low-  
26 income and middle-income countries. *BMJ Glob Heal* 2019;4:e001395.  
27  
28  
29  
30  
31  
32  
33 19 Morgan R, Ayiasi RM, Barman D, *et al*. Gendered health systems: evidence from low-  
34 and middle-income countries. *Heal Res policy Syst* 2018;16:58. doi:10.1186/s12961-018-  
35 0338-5  
36  
37  
38  
39  
40 20 Theobald S, Morgan R, Hawkins K, *et al*. The importance of gender analysis in research  
41 for health systems strengthening. *Health Policy Plan*. 2017;32:v1–3.  
42  
43  
44  
45  
46  
47 21 Tannenbaum C, Ellis RP, Eyssel F, *et al*. Sex and gender analysis improves science and  
48 engineering. *Nature* 2019;575:137–46. doi:10.1038/s41586-019-1657-6  
49  
50  
51 22 More and Better Gender Data: A Powerful Tool for Improving Lives, The World Bank.  
52 2016.  
53  
54  
55  
56  
57  
58  
59  
60

- 1  
2  
3 23 International Organization for Standardization 26000, Guidance on social responsibility.  
4  
5 24 Artificial Intelligence and Start-Ups in Low- and Middle-Income Countries: Progress,  
6  
7 Promises and Perils. 2020.  
8  
9  
10 25 DeCorby-Watson K, Mensah G, Bergeron K, *et al.* Effectiveness of capacity building  
11  
12 interventions relevant to public health practice: a systematic review. *BMC Public Health*  
13  
14 2018;**18**:684. doi:10.1186/s12889-018-5591-6  
15  
16  
17 26 Bob Hayes. Machine Learning Adoption Rates Around the World. *Bus. Broadw.* 2021.  
18  
19 27 Hoodbhoy Z, Chunara R, Waljee A, *et al.* Is there a need for graduate-level programmes  
20  
21 in health data science? A perspective from Pakistan. *Lancet Glob Heal* 2023;**11**:e23–5.  
22  
23 doi:10.1016/S2214-109X(22)00459-4  
24  
25  
26 28 Bates DW, Saria S, Ohno-Machado L, *et al.* Big data in health care: using analytics to  
27  
28 identify and manage high-risk and high-cost patients. *Health Aff (Millwood)*  
29  
30 2014;**33**:1123–31. doi:10.1377/hlthaff.2014.0041  
31  
32  
33 29 Shaoibi A, Neelon B, Lenert LA. Shared Decision Making: From Decision Science to  
34  
35 Data Science. *Med Decis Mak an Int J Soc Med Decis Mak* 2020;**40**:254–65.  
36  
37 doi:10.1177/0272989X20903267  
38  
39  
40  
41  
42  
43  
44  
45  
46  
47  
48  
49  
50  
51  
52  
53  
54  
55  
56  
57  
58  
59  
60

1  
2  
3  
4  
5  
6  
7  
8  
9  
10  
11  
12  
13  
14  
15  
16  
17  
18  
19  
20  
21  
22  
23  
24  
25  
26  
27  
28  
29  
30  
31  
32  
33  
34  
35  
36  
37  
38  
39  
40  
41  
42  
43  
44  
45  
46  
47  
48  
49  
50  
51  
52  
53  
54  
55  
56  
57  
58  
59  
60

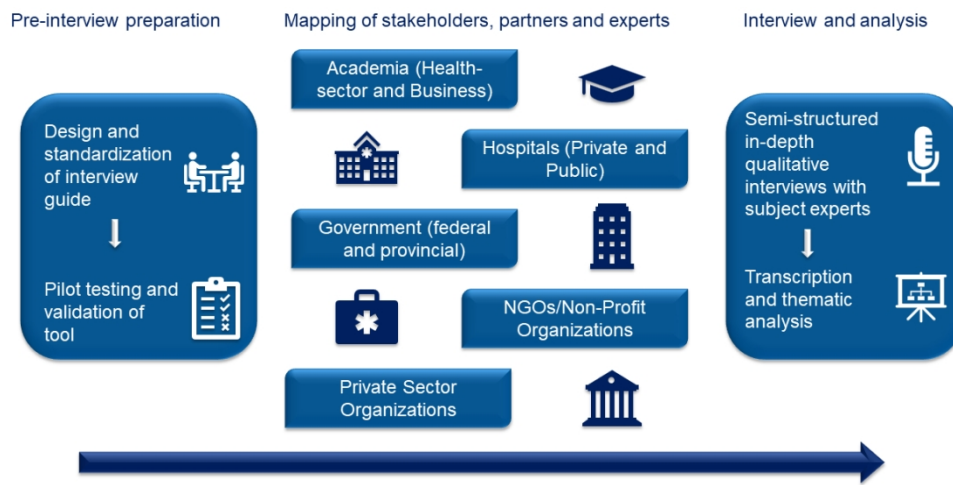

An overview of the methodological framework of the study – participant cohorts, process of interview preparation, conductance, and analysis

108x60mm (300 x 300 DPI)

## Semi-structured interview guide

### **Section 1 : Understanding the health data landscape for Pakistan**

#### **What type of health data exists in Pakistan?**

##### ***Potential prompts in case of a brief reply***

- What type of data at a national/regional/global level supports your decision-making ability/research work?
- What type of health data would further support your ability to make informed decisions?
- Is health data at a Pakistan level accessible?
- Is health data at a Pakistan level of good quality? (define quality)

### **Section 2: Understanding the application of a gender and equity lens to data**

#### ***Potential prompts in case of a brief reply (mostly guided by the interviewee's response)***

- Do we know how to apply a gender/equity lens to our data (disaggregation, analysis etc)
- What population group do you not frequently see available data about?

### **Section 3: Understanding the organizational handle on health data and its current role**

#### ***Potential prompts in case of a brief reply (mostly guided by the interviewee's response)***

- What health data does your organization hold and to what level does your organization engage with the data for decision making.
- How equipped are organizations to manage the health data they hold?
- What kind of infrastructure/software does your organization have? Is it sufficient?

### **Section 4: Understanding perceptions around developing a health data science training program/curriculum**

#### **How effective do you think the introduction of a health data science training curriculum will be, to address barriers?**

##### ***Potential prompts in case of a brief reply (mostly guided by the interviewee's response)***

- What type of training in data science would be most beneficial to you and why?
- What health data science curriculum/training programs exist and are useful?
- Do you think there's an existing need for development of such a program in Pakistan? Why or why not?
- What barriers should such a training program address?
- What components should the health data science training curriculum have?

1  
2  
3  
4  
5  
6  
7  
8  
9  
10  
11  
12  
13  
14  
15  
16  
17  
18  
19  
20  
21  
22  
23  
24  
25  
26  
27  
28  
29  
30  
31  
32  
33  
34  
35  
36  
37  
38  
39  
40  
41  
42  
43  
44  
45  
46  
47

### Consolidated criteria for reporting qualitative studies (COREQ): 32-item checklist

| No. Item                                       | Guide questions/description                                                                                                                 | Reported on Page # |
|------------------------------------------------|---------------------------------------------------------------------------------------------------------------------------------------------|--------------------|
| <b>Domain 1: Research team and reflexivity</b> |                                                                                                                                             |                    |
| <i>Personal Characteristics</i>                |                                                                                                                                             |                    |
| 1. Inter viewer/facilitator                    | Which author/s conducted the interview or focus group?                                                                                      | 7                  |
| 2. Credentials                                 | What were the researcher's credentials? E.g., PhD, MD                                                                                       | 8                  |
| 3. Occupation                                  | What was their occupation at the time of the study?                                                                                         | 8                  |
| 4. Gender                                      | Was the researcher male or female?                                                                                                          | 7                  |
| 5. Experience and training                     | What experience or training did the researcher have?                                                                                        | 8                  |
| <i>Relationship with participants</i>          |                                                                                                                                             |                    |
| 6. Relationship established                    | There was no personal relationship between interviewers                                                                                     | N/A                |
| 7. Participant knowledge of the interviewer    | What did the participants know about the researcher? e.g., personal goals, reasons for doing the research                                   | N/A                |
| 8. Interviewer characteristics                 | What characteristics were reported about the inter viewer/facilitator? e.g., Bias, assumptions, reasons and interests in the research topic | N/A                |
| <b>Domain 2: study design</b>                  |                                                                                                                                             |                    |
| <i>Theoretical framework</i>                   |                                                                                                                                             |                    |



|                                          |                                                                                                                                                           |     |
|------------------------------------------|-----------------------------------------------------------------------------------------------------------------------------------------------------------|-----|
|                                          |                                                                                                                                                           |     |
| 9. Methodological orientation and Theory | What methodological orientation was stated to underpin the study? e.g., grounded theory, discourse analysis, ethnography, phenomenology, content analysis | 9   |
| <i>Participant selection</i>             |                                                                                                                                                           |     |
| 10. Sampling                             | How were participants selected? e.g., purposive, convenience, consecutive, snowball                                                                       | 8   |
| 11. Method of approach                   | How were participants approached? e.g., face-to-face, telephone, mail, email                                                                              | 8   |
| 12. Sample size                          | How many participants were in the study?                                                                                                                  | 10  |
| 13. Non-participation                    | How many people refused to participate or dropped out? Reasons?                                                                                           | N/A |
| <i>Setting</i>                           |                                                                                                                                                           |     |
| 14. Setting of data collection           | Where was the data collected? e.g., home, clinic, workplace                                                                                               | 8   |
| 15. Presence of non-participants         | Was anyone else present besides the participants and researchers?                                                                                         | 8   |
| 16. Description of sample                | What are the important characteristics of the sample? e.g., demographic data, date                                                                        | 10  |
| <i>Data collection</i>                   |                                                                                                                                                           |     |
| 17. Interview guide                      | Were questions, prompts, guides provided by the authors? Was it pilot tested?                                                                             | 7   |
| 18. Repeat interviews                    | Were repeat inter views carried out? If yes, how many?                                                                                                    | N/A |
| 19. Audio/visual recording               | Did the research use audio or visual recording to collect the data?                                                                                       | 9   |

|                                        |                                                                                                                                     |       |
|----------------------------------------|-------------------------------------------------------------------------------------------------------------------------------------|-------|
| 20. Field notes                        | Were field notes made during and/or after the interview or focus group?                                                             | N/A   |
| 21. Duration                           | What was the duration of the inter views or focus group?                                                                            | 8     |
| 22. Data saturation                    | Was data saturation discussed?                                                                                                      | 8     |
| 23. Transcripts returned               | Were transcripts returned to participants for comment and/or correction?                                                            | N/A   |
| <b>Domain 3: analysis and findings</b> |                                                                                                                                     |       |
| <i>Data analysis</i>                   |                                                                                                                                     |       |
| 24. Number of data coders              | How many data coders coded the data?                                                                                                | 9     |
| 25. Description of the coding tree     | Did authors provide a description of the coding tree?                                                                               | N/A   |
| 26. Derivation of themes               | Were themes identified in advance or derived from the data?                                                                         | 9     |
| 27. Software                           | What software, if applicable, was used to manage the data?                                                                          | 9     |
| 28. Participant checking               | Did participants provide feedback on the findings?                                                                                  | N/A   |
| <i>Reporting</i>                       |                                                                                                                                     |       |
| 29. Quotations presented               | Were participant quotations presented to illustrate the themes/findings?<br>Was each quotation identified? e.g., participant number | 11-17 |
| 30. Data and findings consistent       | Was there consistency between the data presented and the findings?                                                                  | 10-17 |
| 31. Clarity of major themes            | Were major themes clearly presented in the findings?                                                                                | 10-17 |
| 32. Clarity of minor themes            | Is there a description of diverse cases or discussion of minor themes?                                                              | N/A   |

1  
2  
3  
4  
5  
6  
7  
8  
9  
10  
11  
12  
13  
14  
15  
16  
17  
18  
19  
20  
21  
22  
23  
24  
25  
26  
27  
28  
29  
30  
31  
32  
33  
34  
35  
36  
37  
38  
39  
40  
41  
42  
43  
44  
45  
46  
47

For peer review only

# BMJ Open

## Health Data Ecosystem in Pakistan – A Multi-sectoral Qualitative Assessment of Needs and Opportunities

|                                 |                                                                                                                                                                                                                                                                                                                                                                                                                                                                                                                                                                                                                                                                                                                                                                                                                                                                                                                 |
|---------------------------------|-----------------------------------------------------------------------------------------------------------------------------------------------------------------------------------------------------------------------------------------------------------------------------------------------------------------------------------------------------------------------------------------------------------------------------------------------------------------------------------------------------------------------------------------------------------------------------------------------------------------------------------------------------------------------------------------------------------------------------------------------------------------------------------------------------------------------------------------------------------------------------------------------------------------|
| Journal:                        | <i>BMJ Open</i>                                                                                                                                                                                                                                                                                                                                                                                                                                                                                                                                                                                                                                                                                                                                                                                                                                                                                                 |
| Manuscript ID                   | bmjopen-2023-071616.R3                                                                                                                                                                                                                                                                                                                                                                                                                                                                                                                                                                                                                                                                                                                                                                                                                                                                                          |
| Article Type:                   | Original research                                                                                                                                                                                                                                                                                                                                                                                                                                                                                                                                                                                                                                                                                                                                                                                                                                                                                               |
| Date Submitted by the Author:   | 24-Aug-2023                                                                                                                                                                                                                                                                                                                                                                                                                                                                                                                                                                                                                                                                                                                                                                                                                                                                                                     |
| Complete List of Authors:       | Mahmood, Sana; Aga Khan University; Aga Khan University, Department of Community Health Sciences<br>Noorali, Ali Aahil; The Aga Khan University<br>Manji, Afshan; Aga Khan University, Department of Medicine; Aga Khan University<br>Afzal, Noreen; The Aga Khan University<br>Abbas, Saadia; Aga Khan University, Department of Medicine<br>Qamar, Javeria Bilal; Aga Khan University, Department of Medicine<br>Siddiqi, Sameen; Aga Khan University Medical College Pakistan, Community Health Sciences Department<br>Hoodbhoy, Zahra; Aga Khan University, Department of Pediatrics and Child Health<br>Virani, Salim; Michael E. DeBakey Veterans Affairs Medical Center HSR&D, Health Policy, Quality & Informatics Program,<br>Bhutta, Zulfiqar; Hosp Sick Children, Centre for Global Child Health<br>Samad, Zainab; The Aga Khan University; Duke Clinical Research Institute, Department of Medicine |
| <b>Primary Subject Heading</b>: | Public health                                                                                                                                                                                                                                                                                                                                                                                                                                                                                                                                                                                                                                                                                                                                                                                                                                                                                                   |
| Secondary Subject Heading:      | Qualitative research                                                                                                                                                                                                                                                                                                                                                                                                                                                                                                                                                                                                                                                                                                                                                                                                                                                                                            |
| Keywords:                       | QUALITATIVE RESEARCH, PUBLIC HEALTH, Quality in health care < HEALTH SERVICES ADMINISTRATION & MANAGEMENT                                                                                                                                                                                                                                                                                                                                                                                                                                                                                                                                                                                                                                                                                                                                                                                                       |
|                                 |                                                                                                                                                                                                                                                                                                                                                                                                                                                                                                                                                                                                                                                                                                                                                                                                                                                                                                                 |

SCHOLARONE™  
Manuscripts



I, the Submitting Author has the right to grant and does grant on behalf of all authors of the Work (as defined in the below author licence), an exclusive licence and/or a non-exclusive licence for contributions from authors who are: i) UK Crown employees; ii) where BMJ has agreed a CC-BY licence shall apply, and/or iii) in accordance with the terms applicable for US Federal Government officers or employees acting as part of their official duties; on a worldwide, perpetual, irrevocable, royalty-free basis to BMJ Publishing Group Ltd ("BMJ") its licensees and where the relevant Journal is co-owned by BMJ to the co-owners of the Journal, to publish the Work in this journal and any other BMJ products and to exploit all rights, as set out in our [licence](#).

The Submitting Author accepts and understands that any supply made under these terms is made by BMJ to the Submitting Author unless you are acting as an employee on behalf of your employer or a postgraduate student of an affiliated institution which is paying any applicable article publishing charge ("APC") for Open Access articles. Where the Submitting Author wishes to make the Work available on an Open Access basis (and intends to pay the relevant APC), the terms of reuse of such Open Access shall be governed by a Creative Commons licence – details of these licences and which [Creative Commons](#) licence will apply to this Work are set out in our licence referred to above.

Other than as permitted in any relevant BMJ Author's Self Archiving Policies, I confirm this Work has not been accepted for publication elsewhere, is not being considered for publication elsewhere and does not duplicate material already published. I confirm all authors consent to publication of this Work and authorise the granting of this licence.

## Health Data Ecosystem in Pakistan – A Multi-sectoral Qualitative Assessment of Needs and Opportunities

**Authors:** Sana Mahmood EdM <sup>1,2,3</sup>, Ali Aahil Noorali MBBS <sup>4,5</sup>, Afshan Manji MSc <sup>4,5</sup>, Noreen Afzal MPhil <sup>1</sup>, Saadia Abbas <sup>4</sup>, Javeria Bilal Qamar <sup>4</sup>, Sameen Siddiqi DrMed <sup>2</sup>, Zahra Hoodbhoy PhD<sup>6</sup>, Salim S. Virani PhD<sup>7</sup>, Zulfiqar A. Bhutta, PhD <sup>3</sup>, Zainab Samad MHS <sup>3,4,8</sup>

### Affiliations:

<sup>1</sup> Dean's Office, Medical College, Aga Khan University, Karachi, Pakistan

<sup>2</sup> Department of Community Health Sciences, Aga Khan University, Karachi, Pakistan

<sup>3</sup> Institute of Global Health and Development, Aga Khan University, Karachi, Pakistan

<sup>4</sup> Department of Medicine, Medical College, Aga Khan University, Karachi, Pakistan

<sup>5</sup> CITRIC Health Data Science Center, Medical College, Aga Khan University, Karachi, Pakistan

<sup>6</sup> Department of Pediatrics and Child Health, Aga Khan University, Karachi, Pakistan

<sup>7</sup> Division of Cardiology, Department of Medicine, Baylor College of Medicine, USA

<sup>8</sup> Division of Cardiology, Department of Medicine, Duke University, Duke Global Health Institute, Duke Clinical Research Institute, Durham, NC

### Corresponding Author:

Zainab Samad, MBBS, MHS

Aga Khan University, Stadium Road, Karachi, Pakistan, 74800

Email: [samad.zainab@aku.edu](mailto:samad.zainab@aku.edu)

Phone: 03002017196

1  
2  
3  
4  
5  
6  
7  
8  
9  
10  
11  
12  
13  
14  
15  
16  
17  
18  
19  
20  
21  
22  
23  
24  
25  
26  
27  
28  
29  
30  
31  
32  
33  
34  
35  
36  
37  
38  
39  
40  
41  
42  
43  
44  
45  
46  
47  
48  
49  
50  
51  
52  
53  
54  
55  
56  
57  
58  
59  
60

**Word count:**

4,409 words

For peer review only

## Abstract

### Objective:

Data are essential for tracking and monitoring of progress on health-related sustainable development goals (SDGs). But the capacity to analyze subnational and granular data is limited in low- and middle-income countries. Although Pakistan lags behind on achieving several health-related SDGs, its health information capacity is nascent. Through an exploratory qualitative approach, we aimed to understand the current landscape and perceptions on data in decision making among stakeholders of the health data ecosystem in Pakistan.

### Design:

We used an exploratory qualitative study design.

### Setting:

This study was conducted at the Aga Khan University, Karachi, Pakistan.

### Participants:

We conducted semi-structured, in-depth interviews with multidisciplinary and multisectoral stakeholders from academia, hospital management, government, NGOs, and other relevant private entities till thematic saturation was achieved. Interviews were recorded and transcribed, followed by thematic analysis using NVivo.

### Results:

Thematic analysis of 15 in-depth interviews revealed three major themes: 1) Institutions are collecting data, but face barriers to its effective utilization for decision making. These include lack of collection of needs-responsive data, lack of a gender/equity in data collection efforts, inadequate digitization, data reliability, and limited analytical ability; 2) There is openness and enthusiasm for sharing data for advancing health, however, multiple barriers hinder this



1  
2  
3 including appropriate regulatory frameworks, platforms for sharing data, inter-operability, and  
4 defined win-win scenarios; 3) There is limited capacity in the area of both human capital and  
5 infrastructure, for being able to use data to advance health but there is appetite to improve and  
6 invest in capacity in this area  
7  
8  
9  
10  
11  
12  
13  
14

15 **Conclusions:**

16  
17 Our study identified key areas of focus that can contribute to orient a national health data  
18 roadmap and ecosystem in Pakistan.  
19  
20  
21  
22  
23  
24  
25  
26  
27  
28  
29  
30  
31  
32  
33  
34  
35  
36  
37  
38  
39  
40  
41  
42  
43  
44  
45  
46  
47  
48  
49  
50  
51  
52  
53  
54  
55  
56  
57  
58  
59  
60

### Strengths and limitations of this study

- Our study participants were experts and decision makers from multiple sectors, across provinces, and with work at the intersection of health and data science.
- In-depth interviews with key-informants allowed for a thorough exploration of the scope and challenges for health data science in Pakistan.
- We did not conduct patient interviews to learn about their opinions about the application of health data science in Pakistan.

## Introduction

Data are essential for tracking and monitoring progress on health-related sustainable development goals (SDGs).[1–3] While data and data analytics are being used in high income countries (HICs) to improve health equity, health outcomes, and continuously inform healthcare systems, their use in low-middle-income countries (LMICs) is lagging.[4–8] Investing in data ecosystems represents an important opportunity for monitoring and quickening progress on health-related SDGs in LMICs.[1,8–10]

With a population of 230 million, Pakistan, the fifth most populous LMIC, has a high estimated mortality and morbidity burden for various diseases, but its health system and health information system capacity is nascent.[11,12] However, during the COVID-19 pandemic, data were made nationally available in almost real-time, and data science methods were used to inform health policy and population level interventions such as smart lock downs and vaccinations efforts.[13,14] Multi-stakeholder and interprovincial collaboration underpinned this successful effort and highlighted the need for a national health data ecosystem outside of crisis situations. To inform such future efforts, an understanding of the current perceptions around health data, its use in decision making and the health data ecosystem in Pakistan is required. To this end, we adopted a qualitative approach to understand the current landscape as well as perceptions on data in decision-making among a wide range of stakeholders.

## Methods

### Study Design and Setting:

This was an exploratory qualitative study with the primary objectives to comprehend the scope of the health data ecosystem in Pakistan, knowledge and attitudes around developing partnerships and sharing data, and perceptions around the need for developing health data science capacity in Pakistan.

The study was led by investigators at the Aga Khan University (AKU) in Pakistan. With a forty-year presence in Pakistan, AKU has well established partnerships at both provincial and national levels, with government and academia, enabling regular engagement in interdisciplinary policy discussions and fora.

### Study instrument:

A semi-structured interview guide was designed using carefully curated questions (available in supplement 1). The guide prompted a detailed discussion on the landscape and scope of existing health data. Further discussion was rooted in potential facilitators and barriers to building a national health data collaborative that would contribute to improved health outcomes in Pakistan. This included understanding the nature of existing policies and collaboratives, the availability and need of human capital for health data initiatives, and structures—from governance to infrastructure, which were present or would need to be developed and implemented to allow for organizations across sectors to comfortably share data to advance health outcomes in Pakistan.

The guide was pilot-tested among a diverse cohort of four individuals and judged for clarity of questions. Feedback from the pilot testing was incorporated to address gaps in the interview

1  
2  
3  
4 guide. Interviews were conducted by two female investigators (ZS and SM), who were the  
5  
6  
7 departmental chair and director, respectively, while the research staff (AAN, AA, SA, JBQ)  
8  
9  
10 acted as observers. Standardization was maintained across all interviews by ensuring that the  
11  
12  
13 same two interviewers conducted all the interviews with the same guide. Both interviewers had  
14  
15  
16 prior experience of conducting qualitative interviews. Each interview was conducted online for a  
17  
18  
19 duration that varied between 30 minutes and 2 hours.  
20  
21  
22  
23  
24

### 25 **Sampling, Inclusion and Exclusion Criteria:**

26  
27  
28 A scoping exercise was conducted to identify experts and relevant institutions. Through  
29  
30 discussion, the investigators collectively identified key sectors in the health ecosystem of  
31  
32 Pakistan for a landscape analysis which formed the inclusion criteria: 1. University and academia  
33  
34 with faculty in health and/or information technology (IT), 2. Senior-level hospital management  
35  
36 (both private and public) 3. Government ministers (federal and provincial/state), 4. Non-  
37  
38 governmental organizations (NGOs) and 5. Private-sector organizations (pharmaceutical,  
39  
40 finance, and health insurance sectors). There were no major or minor exclusion criteria.  
41  
42  
43

44 Based on the SDGs 4, 5 and 9 [15] (quality education, gender equality and industry, innovation  
45  
46 and infrastructure respectively), we performed a mapping of major institutions across these  
47  
48 domains in the public and private health sectors, private organizations and NGOs. Major  
49  
50 institutions were defined as those that were expected to have organizational maturity and scale in  
51  
52 the area and capacity to collect data. Lastly, individuals with at least five years of leadership  
53  
54 experience in their respective domains were eligible to participate in the study.  
55  
56  
57

1  
2  
3 Following convenience sampling to select key stakeholders with a particular focus on those with  
4 management/decision-making roles, invites were extended via email, and interviews were  
5  
6 arranged. Thematic saturation was reached at 15 interviews which comprised the final study  
7  
8 sample. Figure 1 illustrates the study methodology.  
9  
10  
11  
12  
13

### 14 **Data Analysis:**

15  
16 The six-step method of thematic analysis of Braun and Clarke (2006) guided the analytical  
17 process.[16] Interviews were first audio recorded and transcribed verbatim. Since the research  
18  
19 staff were not only observers, but also transcribers for the interviews, these roles helped them get  
20  
21 familiarized and immersed with the collected data. Transcripts were imported into NVivo  
22  
23 (version 12). An initial list of a priori codes was used by two research team members (AAN and  
24  
25 AM) to code the transcripts. New codes emerging from the data, which were deemed relevant to  
26  
27 the study objectives were also added to this list. This codebook was refined through iteration and  
28  
29 consensus among research staff which helped in standardization of the codes applied in all  
30  
31 transcripts.  
32  
33  
34  
35  
36

37 Data coded under similar codes were then grouped to identify major themes, which were paired  
38  
39 with direct verbatim quotations from the interviewees. The themes were then reviewed to ensure  
40  
41 adequate data and participant quotations supported the creation of each theme. All themes were  
42  
43 then defined to convey an adequate description of its subthemes and relevant data. Lastly, the  
44  
45 results were written in a format to describe the analyzed data in detail.  
46  
47  
48  
49  
50

### 51 **Patient and Public Involvement**

1  
2  
3 Patients and the public were not involved in the research design, analysis, and dissemination of  
4  
5 the findings.  
6  
7  
8  
9

### 10 **Ethical Considerations:**

11  
12 The study received approval from the Ethical Review Committee at AKU (ERC # 2021-5839-  
13  
14 16883). Written informed consent over email for the study was obtained from each participant  
15  
16 before starting the interview.  
17  
18  
19  
20

### 21 **Results**

22  
23 We conducted 15 in-depth interviews with a diverse range of stakeholders from five centralized  
24  
25 cohorts. Sector and designation of the participants are described in Table 1. Thematic analysis  
26  
27 generated three overarching themes: 1) Institutions are collecting data, but face barriers to its  
28  
29 effective utilization for decision making. These include lack of collection of needs-responsive  
30  
31 data, lack of a gender/equity in data collection efforts, inadequate digitization, data reliability,  
32  
33 and limited analytical ability.; 2) There is openness and enthusiasm for sharing data for  
34  
35 advancing health, however, multiple barriers hinder this endeavor; 3) There is limited capacity in  
36  
37 the area of both human capital and infrastructure, for being able to use data to advance health but  
38  
39 there is appetite to improve capacity in this area.  
40  
41  
42  
43  
44

| 45 <b>Table 1: Sector and designation of study</b> |                 |
|----------------------------------------------------|-----------------|
| 46 <b>participants (n=15)</b>                      |                 |
| 47 <b>Sector</b>                                   | 48 <b>N (%)</b> |
| 49 Academia                                        | 1               |
| 50 Hospitals                                       | 2               |
| 51 Government                                      | 3               |
| 52 Non-governmental organizations (NGOs)           | 3               |
| 53 Private-sector organizations                    | 6               |
| 54                                                 |                 |
| 55                                                 |                 |
| 56 <b>Designation</b>                              |                 |

|                       |   |
|-----------------------|---|
| Mid-level management  | 5 |
| Chief medical officer | 2 |
| Health minister       | 2 |
| Senior management     | 6 |

**Theme 1: Institutions are collecting data, but face barriers to its effective utilization for decision making. These include lack of collection of needs-responsive data, lack of gender/equity in data collection efforts, inadequate digitization, data reliability and limited analytical ability.**

Experts communicated that there are several initiatives at the intersection of health and data, and organizations are collecting and holding data, but these initiatives exist in silos. Institutions have a large volume of operational data, but several barriers to their effective utilization were identified. These ranged from lack of collection of needs-responsive data (data not capturing variables required for decision making, interventions and policy reform), inadequate digitization, inappropriate data formats, data reliability, value placed on ultimate data use by data collectors, and human capacity to gauge scientific insights from it.

Inadequate data mapping and lack of dataset awareness within institutions affecting access and use were identified as barriers. An expert in digital health strategy noted that *“I would think that the dissemination of the data is a far bigger issue than the data holes being there. So, if you start digging, you find data sets, but you see that no one is aware of them, even though a lot of activity has happened”*.

Leaders identified lack of needs-responsive data collection as a barrier to effective utilization of data for decision making. A provincial health minister stated that, *“We find that getting population level information is really difficult. And you can get this information, but it's not*



1  
2  
3 *really formalized - you just hear verbal estimates. So, in terms of planning, there is no common*  
4 *information base that people have that is like the gold standard".* In a similar vein, a leader in a  
5  
6 *prominent healthcare institution noted, "There are very few hospitals in Pakistan that actually*  
7 *record quality and patient safety data. So, hospital quality level data, the kind that exists in the*  
8 *NHS, or in the US etc. doesn't exist here".* In addition, most participants noted that gender and  
9  
10 *equity lens have not been widely considered, neither during the collection and analysis of health*  
11 *data, nor in the design of research and data driven initiatives. With regards to gender, a leader at*  
12 *a non-profit organization explained that: "Disaggregated data by gender is probably a large*  
13 *problem nationally, particularly with development indicators".* Equity is often overlooked in  
14  
15 *conversations around data, and when considered, the level of commitment is inadequate. A*  
16 *governmental leader mentioned that: "Unfortunately, I think equity is more a function of*  
17 *conversations with development partners. And it does translate to some commitment, but not the*  
18 *level of commitment that should be the case".*

19  
20  
21  
22  
23  
24  
25  
26  
27  
28  
29  
30  
31  
32  
33  
34 The digitization and structure of available data is another holdup, as stated by a manager at a  
35 non-governmental organization: *"Some organizations don't have data in a format that's easily*  
36 *accessible, because they don't have electronic systems".* Most participants shared the perception  
37  
38 that there is a lack of an appropriately designed system to help collate data to its most desired  
39  
40 format. This sentiment was shared by another expert in epidemiology at a tertiary care hospital,  
41  
42 who noted that, *"The reality was when I came in, I realized that the structure of the data being*  
43 *collected, was not conducive to be pulled out, right, so we couldn't do any research".* Another  
44  
45 expert at an NGO noted, *"When I joined X organization, all this information was collected on*  
46 *different platforms, some of this was paper based, some of it was collected with in-house*  
47  
48  
49  
50  
51  
52  
53  
54  
55  
56  
57  
58  
59  
60

1  
2  
3 *applications. And none of it was necessarily standards-based. And none of these applications*  
4 *were well designed for information sharing”.*  
5  
6  
7

8  
9 Data reliability was another aspect highlighted in the interviews. Specifically in the context of  
10 data sharing, a leader at an NGO noted, “*You get conflicting information....who is going to verify*  
11 *whether database A is correct or database B is correct”.*  
12  
13  
14

15  
16  
17 A provincial minister also suggested that while data-driven initiatives do exist, there is  
18 sometimes lack of clarity regarding the purpose and objectives of successfully collecting data  
19 and ultimately the value attached to these efforts among those collecting and managing this  
20 information. “*We tried to give the lady health workers an app to update in real time to update*  
21 *the data about the diseases that they are seeing and the pregnant women that they are seeing. We*  
22 *don't have a proper accountability system and so we cannot tell people that this is something*  
23 *important for health policy and interventions and for a database for knowledge”.*  
24  
25  
26  
27  
28  
29  
30  
31  
32  
33

34 Many interviewees felt that where data did exist, there were other obstacles like significant  
35 deficits in staffing and the inability to utilize the collected data. A leader in an NGO noted, “*We*  
36 *do not have trained people in the system, even people who have dealt with data for a long time,*  
37 *do not have the analytical skills to make sense of it, draw conclusions, and ask questions. That*  
38 *has been a real challenge”.*  
39  
40  
41  
42  
43  
44  
45  
46  
47  
48

49 **Theme 2: There is openness and enthusiasm for sharing data for advancing health,**  
50 **however, multiple barriers hinder this including appropriate regulatory frameworks,**  
51 **platforms for sharing data, inter-operability, and defined win-win scenarios**  
52  
53  
54  
55  
56  
57

1  
2  
3 Considering a shared vision to improve health outcomes in Pakistan, leaders indicated overall  
4 willingness to share data and partner for this common mission, expressing keen interest and  
5  
6 stating their openness to proposals and collaborations. Defining win-win scenarios, in terms of  
7  
8 shared objectives between entities and learning from each other's areas of expertise would be  
9  
10 critical to organizations sharing data, as a government leader observed: *"I think we are open to*  
11  
12 *proposals where, say, we make data in specific areas available. As long as we get something in*  
13  
14 *return - if I can get more immediate impact out of that process, then that would excite me more.*  
15  
16 *So, you name an area where we can problem-solve, and we can actually close the loop on that*  
17  
18 *partnership (in terms of how we can actually translate it to some impact)".* Interestingly, an  
19  
20 epidemiologist at a tertiary care hospital shared insights about ensuring that a shared  
21  
22 collaborative keeps 'democracy of data' as a central guiding principle: *"I think there has to be*  
23  
24 *democracy of data sharing within an organization because there's no point hanging on to data,*  
25  
26 *and not sharing it so that somebody can make use of it, and that is one of the problems; people*  
27  
28 *hang on to data as a good treasure that they cannot share with anybody".*

29  
30  
31  
32  
33  
34  
35  
36 Most experts shared that certain challenges and pertinent questions would need to be accounted  
37  
38 for to build a sustainable, shared, accessible data ecosystem. These include the validity and  
39  
40 accuracy of datasets themselves, privacy and regulatory framework around data sharing,  
41  
42 addressing systemic differences between different sectors and inadequate workforce and training.  
43  
44  
45 Experts shared that even if the data exists, dissemination of data is always an issue because data  
46  
47 governance is a nascent field in Pakistan. The term governance is also used broadly by  
48  
49 interviewees that use it to refer to privacy and security of data as well as an overarching  
50  
51 governing structure to establish appropriate ownership of data. An entity leader, at a premier  
52  
53 bank, noted that this also holds true for other sectors of Pakistan, such as the well-resourced  
54  
55  
56  
57

1  
2  
3 finance sector, where one of the country's largest banks is still working through the early stages  
4 of data governance. Furthermore, structuring a data system to be useful requires understanding  
5 what data fields one has in their database, what should go into those data fields, and a system that  
6 is designed to ensure a clear utilitarian purpose. Though governance appears to be a major barrier  
7 for a data collaborative, subjects report that missing-ness and access to data are also impediments  
8 to utilization.  
9

10  
11  
12 A manager and planning executive at a bank, noted: *"Some concerns in data sharing include*  
13 *who will own the data, what will be done with the data? Will the data remain valid or not, will*  
14 *transparency be maintained, privacy rules will be followed or not, ownership of the data? Where*  
15 *will data be used ultimately"*.

16  
17  
18 Similarly, a chief medical officer at a tertiary hospital mentioned that: *"There needs to be a lot*  
19 *more structure put into data sharing, and by structure, what I mean is that rules and regulations*  
20 *(which need to be set up a priori). That will really give confidence to individual institutions and*  
21 *individuals who own that data - that their data is going to be used properly, reliably and*  
22 *honestly"*.

23  
24  
25 Interoperability of data sets was reported as a big challenge due to differences in dataset formats  
26 and different data capacity/skills across different institutions and across public and private  
27 institutions. Issues of interoperability are further pronounced when complemented with  
28 differences in the approach of private vs public sectors and inpatient vs outpatient data. A leader  
29 in healthcare administration while describing the public sector healthcare stated that *"Record*  
30 *keeping is something that is very poor there. In-patient record keeping is there, but there is*  
31 *nothing for out-patients at all. The private sector does keep the record, but the public sector does*  
32 *not. But the private sector does not share that data at all"*.

1  
2  
3  
4  
5 **Theme 3: There is limited capacity in the area of both human capital and infrastructure,**  
6 **for being able to use data to advance health but there is appetite to improve and invest in**  
7 **capacity in this area**  
8  
9  
10

11 Inadequate human resources in data management and analytical skills in organizations was  
12 identified as a major barrier to both effective internal use of data and external collaborative data  
13 sharing efforts. Participants remarked that data sharing through a collaborative, would require  
14 capacity-building in this area.  
15  
16  
17  
18  
19  
20

21  
22  
23 A manager at an NGO noted: *“The issue is not whether people are willing to share data. But*  
24 *certain organizations, traditional non-profit ones for example, don’t have data teams or data*  
25 *managers (because of cost budgetary constraints). So, I think that these organizations often*  
26 *don’t have the capacity to manage data”*. It was also mentioned that lack of capacity building  
27 was a barrier to successfully analyzing and synthesizing data, where many healthcare facilities at  
28 the district level were still using a paper-based format for recording data since their staff were  
29 not proficient in the use of technology. A provincial healthcare leader noted: *“The main problem*  
30 *here is that we don’t have an HR [human resource] there or a proper computerized system there*  
31 *to log in that data and upload it. We have a lot of restrictions in the IT department”*. Similarly, a  
32 senior leader at a tertiary care hospital mentioned: *“We have the data, but we don’t have the*  
33 *capacity and capability to analyze it and make changes in healthcare”*. There was a clear  
34 appetite and keen interest in investing organizational data capacity ranging from investing in  
35 needs-responsive data repositories and electronic systems, to upskilling the current workforce. A  
36  
37  
38  
39  
40  
41  
42  
43  
44  
45  
46  
47  
48  
49  
50  
51  
52  
53  
54  
55  
56  
57  
58  
59  
60

1  
2  
3  
4 representative from academia shared their experience of setting up a data repository and its  
5  
6  
7 potential future impact: *“The long-term objective of this Higher Education Data Repository*  
8  
9  
10 *initiative is that we collect all the granular information throughout a student's life cycle. This will*  
11  
12  
13 *generate a lot of data for analysis, about what kind of educational needs we have in our system,*  
14  
15  
16 *what kind of courses do we need to specialize in for our students and the areas that our faculty*  
17  
18 *members need to specialize in”.*

21  
22 A representative from a large public sector tertiary care hospital reported their initiative of data  
23  
24 automation and the barriers associated with it, notably, administrative and financial challenges  
25  
26 around staffing plans: *“ We have begun an initiative at our hospital, where we are starting to do*  
27  
28 *automation of the data and that is happening but I really wouldn't be able to say to what extent*  
29  
30 *we have been successful with that. The data is within the automation center with the HR. That is*  
31  
32 *also not working because our staffing there has been rejected”.* This highlights the multifaceted  
33  
34 nature of this dilemma – while some initiatives may be headed in the right direction, approvals to  
35  
36 enact and sustain those initiatives are met with challenges.

37  
38  
39  
40  
41 An NGO leader described the process, components, and importance of building a data-driven  
42  
43 team – a cohesive unit of trained individuals that understand the application of data sciences to  
44  
45 health. He stated: *“There are four skills that I think are important in building out a data team*  
46  
47 *that we found. One is data engineering, which is just someone who can query databases,*  
48  
49 *particularly complex databases...Then, I think the next skill that we found useful is analytics,*  
50  
51 *which is how to develop dashboards. And that is a very easily trainable skill. So, the third skill*  
52  
53 *that's (commonly) not there is knowing what dashboard to make. And the fourth skill is data*  
54  
55  
56  
57

1  
2  
3 *science, which is basically being able to model data and that's an even rarer skill especially*  
4  
5 *locally”.*  
6

7  
8 A key skill within building capacity to manage and analyze data is the ability to effectively  
9  
10 communicate results. A government health leader also delineated the importance of  
11  
12 communication in building health data capacity which may be an essential, yet neglected, skill.  
13

14  
15 After data collection and analysis, the success of any subsequent policy and prevention measures  
16  
17 depended largely on how they are communicated to people. She stated that, *“There must be a*  
18  
19 *trigger factor that allows the person to do a communications strategy and awareness policy to*  
20  
21 *send that message across. I think communication is very important. You specifically need to*  
22  
23 *know how to communicate”.*  
24

25  
26 A Government leader also stated the need for and importance of on-the-job training by stating  
27  
28 that *“For me, the single silver bullet is creating data management routines that act as on the job*  
29  
30 *training for managers”.* He added, *“... you need a data boot camp for health leaders, like that is*  
31  
32 *weeklong. And that is sort of morning to night. And that's trying to basically break their thinking*  
33  
34 *and get them to use differently the information that is available, because there is still a lot more*  
35  
36 *information that is available”.*  
37  
38  
39  
40  
41  
42  
43  
44

## 45 **Discussion**

46  
47 Our study is the first, multi-disciplinary endeavor to understand perceptions on health data and  
48  
49 health data science in Pakistan. The main finding from our qualitative analysis is that the scope  
50  
51 of data science in health for advancing health outcomes, is far-reaching in Pakistan and likely in  
52  
53 other LMICs where organizations have collected a great deal of data but are in the early stages of  
54  
55  
56  
57  
58  
59  
60

1  
2  
3 understanding how best to leverage and utilize this data. Furthermore, there is potential for  
4  
5 establishing a health data ecosystem comprised of a health data collaborative with an appropriate  
6  
7 governance structure, intentionality toward data design elements focusing on gender, equity, and  
8  
9 needs-responsiveness, that is supported by appropriate capacity building initiatives. Our study  
10  
11 findings suggest that while we are at nascent stages of using data to progress a national health  
12  
13 agenda, several independent and national efforts are being made to allow for digitization and  
14  
15 automation in healthcare and there is keen interest in investment in building capacity in this area.  
16  
17 Even though the far-reaching scope of health data and data science methods in healthcare and  
18  
19 their potential benefits are recognized by developing countries, development of a national data  
20  
21 collaborative that might serve as a foundational block of a larger health data ecosystem is a  
22  
23 complex endeavor and presents some challenges.[10] A principal lever for this agenda is timely  
24  
25 access to the right information, but this has been a scarce resource in LMICs.[17]  
26  
27 Lack of rigorous and structured systems, problems with accuracy, credibility and completeness,  
28  
29 inadequacy of trained personnel with core competencies, and unavailability of analytic tools  
30  
31 were core obstacles highlighted by experts. Furthermore, there are very limited efforts to  
32  
33 propagate a multimodal, multisectoral, and multidisciplinary approach to data, leading to a  
34  
35 conspicuous lack of a central repository of information in LMICs like Pakistan.[8] In line with  
36  
37 recent literature, a key concern highlighted by participants in data sharing was safeguarding their  
38  
39 privacy, confidentiality, and security, with all interviewees agreeing to the need of a governance  
40  
41 and regulatory framework being set up a priori to ensure data transparency and maintaining the  
42  
43 trust of all parties involved that their data will be used honestly and reliably.[8,18]  
44  
45 Our participants also stated that the analysis, design, and collection of health data does not  
46  
47 currently support gender and equity lens as the core of any organization. Disaggregation of data  
48  
49  
50  
51  
52  
53  
54  
55  
56  
57  
58  
59  
60



1  
2  
3 by gender is a problem nationally and is difficult to find. Literature suggests that health system  
4  
5 policy development does not always pay adequate attention to gender and even when policies do  
6  
7 include gender, intentions can evaporate when it comes to actual implementation.[19,20] Study  
8  
9 participants suggested that equity was often a function of conversation with development  
10  
11 partners and that the level of commitment to inclusion of equity needed to be increased.  
12  
13

14 Tannenbaum et al. and The World Bank note that gender data is a powerful tool for improving  
15  
16 lives as lack of disaggregated gender information has resulted in an incomplete disease  
17  
18 understanding.[21,22] Furthermore, gender equity is an integral component of social  
19  
20 responsibility and according to International Organization for Standardization (ISO) 26000  
21  
22 Sustainable Development Goal 5 (Guidance on Social Responsibility), whereby the standard  
23  
24 denotes the importance of having gender-inclusive leadership and governance in ensuring  
25  
26 elimination of gender bias and promotion of gender parity.[23]  
27  
28

29  
30 Our study participants mentioned how organizations collect and store data, have information  
31  
32 management systems, but that data is not being utilized in the most effective way, due to limited  
33  
34 capacity and skillsets. [24] Hence, they emphasized that translation and evidence synthesis  
35  
36 require significant capacity building. A systematic review reflects on the importance of ongoing  
37  
38 training and multilevel strategies needed in development of such programs, and how capacity  
39  
40 building can influence different levels of entire organizations and systems.[25] The types of  
41  
42 interventions assessed included internet-based teaching and workshops. The results of a  
43  
44 worldwide cross-sectional survey by Kaggle et. al, illustrates the extent to which companies in  
45  
46 various countries have adapted to machine learning models, with Israel surpassing even the  
47  
48 United States.[26] This need also represents an opportunity to develop local, contextual health  
49  
50  
51  
52  
53  
54  
55  
56  
57  
58  
59  
60

1  
2  
3 data science programs that equip individuals with appropriate data management and data  
4  
5 analytics skills. [27]  
6

7  
8 A national strategy on establishing a robust health data ecosystem and data collaborative for  
9  
10 Pakistan will be an important next step. This necessitates that the gaps identified globally and in  
11  
12 our qualitative interviews are bridged and data are put into action. In this regard, a national  
13  
14 health digital framework has recently been developed by the Ministry of Health, which can be  
15  
16 used for developing a high-level roadmap. As noted by healthcare experts, the roadmap is to  
17  
18 help healthcare professionals use data science principles to inform decision making, uplifting  
19  
20 research, and guiding clinical approaches to improve healthcare delivery.[28,29]  
21  
22

23  
24 This study has a few limitations. Our findings mainly stemming from interviews among leaders  
25  
26 in the healthcare system of Pakistan do not provide such larger room for generalizability beyond  
27  
28 the Global South. However, we present perspectives from a low resource setting which has  
29  
30 contextual relevancy and implications for other LMICs in the region. Qualitative interviews  
31  
32 focused on perspectives from key management leads at major institutions. This was primarily  
33  
34 because the scope and objectives of this exercise were to assimilate input from experts and  
35  
36 leaders in management, policy, and healthcare. A next step, on establishing a health data  
37  
38 collaborative, will be to ensure data and perspectives from patients and communities, who serve  
39  
40 as key stakeholders in healthcare systems.  
41  
42  
43  
44  
45  
46

## 47 **Conclusion**

48  
49 The present study highlights important opportunities and barriers that need to be addressed to  
50  
51 develop a health data ecosystem in Pakistan. Creation of appropriate governance, regulatory  
52  
53 frameworks, gender, and equity indicators, and defining win-win scenarios, are important  
54  
55  
56  
57

1  
2  
3 principles to consider for planning any national health data collaboratives. To enable this  
4  
5 ecosystem, collaboration is required on strategic outlining of how data can be collated,  
6  
7 organized, curated, updated, and finally pipelined. For achieving this goal, building data science  
8  
9 capacity within organizations would be critical, thus providing the ability to leverage health data  
10  
11 to its full potential for informed decision making.  
12  
13  
14  
15

### 16 17 **Contributors**

18  
19 All authors confirm that they had full access to all the data in the study and accept responsibility  
20  
21 to submit for publication.  
22

23  
24 ZS conceived of, designed the study, collected data, and acquired funding.  
25

26  
27 SM collected the data and wrote the original draft of the manuscript.

28  
29 AAN analyzed and interpreted the data and wrote the original draft of the manuscript.

30  
31 AM analyzed and interpreted the data and wrote the original draft of the manuscript.

32  
33 NA wrote the original draft of the manuscript.

34  
35 SA was involved in data curation and manuscript writing.

36  
37 JQB was involved in data curation and manuscript writing.

38  
39 SS wrote the original draft of the manuscript.

40  
41 ZH wrote the original draft of the manuscript.

42  
43 ZAB wrote the original draft of the manuscript.

44  
45 SSV wrote the original draft of the manuscript.

46  
47 All authors contributed to critically reviewing and editing the manuscript.  
48

### 49 50 51 **Declaration of interests**

1  
2  
3 Dr Zainab Samad reports research grant support from the NIH-Fogarty International Center for  
4 the AKUPI-NCDs Research training program (Project Number 5D43TW011625-02) and  
5  
6  
7 UZIMA DS (U54TW012089); the NIHR, UK for the Centre for IMPACT (NIHR203248); Bill  
8  
9  
10 & Melinda Gates Foundation (INV 021944 & INV 050389); and Duke University.

11  
12 Dr Salim S. Virani MD, PhD, FACC, FAHA, FASPC Research support: U.S. Department of  
13  
14 Veterans Affairs, National Institutes of Health, World Heart Federation, Tahir and Jooma  
15  
16 Family; Honorarium: American College of Cardiology American College of Cardiology  
17  
18 (Associate Editor for Innovations, acc.org); Associate Editor (Current Atherosclerosis Reports,  
19  
20 Current Cardiology reports, Journal of Clinical Lipidology)  
21  
22

23  
24 Dr Zulfiqar Bhutta MBBS, FRCPCH, FAAP, PhD Executive Director of NCD Child  
25  
26  
27  
28  
29

### 30 31 **Funding**

32  
33 This work was supported through a grant from the Bill & Melinda Gates Foundation (grant  
34  
35 number: INV-021944).  
36  
37  
38  
39

### 40 41 **Data availability statement**

42  
43 No data are available.  
44  
45  
46

### 47 48 **Ethics approval**

49  
50 The study received approval from the Ethical Review Committee at AKU (ERC # 2021-5839-  
51  
52 16883).  
53

### 54 55 **License statement**

1  
2  
3 I, the Submitting Author has the right to grant and does grant on behalf of all authors of the  
4 Work (as defined in the below author license), an exclusive license and/or a non-exclusive  
5 license for contributions from authors who are: i) UK Crown employees; ii) where BMJ has  
6 agreed a CC-BY license shall apply, and/or iii) in accordance with the terms applicable for US  
7 Federal Government officers or employees acting as part of their official duties; on a worldwide,  
8 perpetual, irrevocable, royalty-free basis to BMJ Publishing Group Ltd (“BMJ”) its licensees and  
9 where the relevant Journal is co-owned by BMJ to the co-owners of the Journal, to publish the  
10 Work in BMJ Open and any other BMJ products and to exploit all rights, as set out in our  
11 license.  
12  
13  
14  
15  
16  
17  
18  
19  
20  
21  
22  
23

24 The Submitting Author accepts and understands that any supply made under these terms is made  
25 by BMJ to the Submitting Author unless you are acting as an employee on behalf of your  
26 employer or a postgraduate student of an affiliated institution which is paying any applicable  
27 article publishing charge (“APC”) for Open Access articles. Where the Submitting Author  
28 wishes to make the Work available on an Open Access basis (and intends to pay the relevant  
29 APC), the terms of reuse of such Open Access shall be governed by a Creative Commons license  
30 – details of these licenses and which Creative Commons license will apply to this Work are set  
31 out in our license referred to above.  
32  
33  
34  
35  
36  
37  
38  
39  
40  
41  
42  
43  
44  
45  
46

### 47 **Figure legend**

48  
49 Figure 1: An overview of the methodological framework of the study – participant cohorts,  
50 process of interview preparation, conductance, and analysis  
51  
52  
53  
54  
55  
56  
57

## References

- 1 Measuring progress from 1990 to 2017 and projecting attainment to 2030 of the health-related Sustainable Development Goals for 195 countries and territories: a systematic analysis for the Global Burden of Disease Study 2017. *Lancet (London, England)* 2018;**392**:2091–138. doi:10.1016/S0140-6736(18)32281-5
- 2 Transforming our world: the 2030 Agenda for Sustainable Development | Department of Economic and Social Affairs. <https://sdgs.un.org/2030agenda> (accessed 21 Nov 2022).
- 3 Sachs JD, Schmidt-Traub G, Mazzucato M, *et al*. Six Transformations to achieve the Sustainable Development Goals. *Nat Sustain* 2019 29 2019;**2**:805–14. doi:10.1038/s41893-019-0352-9
- 4 Bhavnani SP, Muñoz D, Bagai A. Data Science in Healthcare: Implications for Early Career Investigators. *Circ Cardiovasc Qual Outcomes* 2016;**9**:683–7. doi:10.1161/CIRCOUTCOMES.116.003081
- 5 Sharma A, Harrington RA, McClellan MB, *et al*. Using Digital Health Technology to Better Generate Evidence and Deliver Evidence-Based Care. *J Am Coll Cardiol* 2018;**71**:2680–90. doi:10.1016/j.jacc.2018.03.523
- 6 Ting DSW, Carin L, Dzau V, *et al*. Digital technology and COVID-19. *Nat Med* 2020 264

- 2020;**26**:459–61. doi:10.1038/s41591-020-0824-5
- 7 Imoto S, Hasegawa T, Yamaguchi R. Data science and precision health care. *Nutr Rev* 2020;**78**:53–7. doi:10.1093/nutrit/nuaa110
- 8 Bezuidenhout L, Chakauya E. Hidden concerns of sharing research data by low/middle-income country scientists. *Glob Bioeth = Probl di Bioet* 2018;**29**:39–54. doi:10.1080/11287462.2018.1441780
- 9 Wyber R, Vaillancourt S, Perry W, *et al.* Big data in global health: improving health in low- and middle-income countries. *Bull World Health Organ* 2015;**93**:203–8. doi:10.2471/BLT.14.139022
- 10 Naseem M, Akhund R, Arshad H, *et al.* Exploring the Potential of Artificial Intelligence and Machine Learning to Combat COVID-19 and Existing Opportunities for LMIC: A Scoping Review. *J Prim Care Community Health* 2020;**11**:2150132720963634. doi:10.1177/2150132720963634
- 11 Brief on Census -2017 | Pakistan Bureau of Statistics. <https://www.pbs.gov.pk/content/brief-census-2017> (accessed 21 Nov 2022).
- 12 Roth GA, Abate D, Abate KH, *et al.* Global, regional, and national age-sex-specific mortality for 282 causes of death in 195 countries and territories, 1980–2017: a systematic analysis for the Global Burden of Disease Study 2017. *Lancet* 2018;**392**:1736–88. <http://www.thelancet.com/article/S0140673618322037/fulltext> (accessed 21 Nov 2022).
- 13 Akhtar H, Afridi M, Akhtar S, *et al.* Pakistan’s Response to COVID-19: Overcoming National and International Hypes to Fight the Pandemic. *JMIR Public Heal Surveill* 2021;**7**. doi:10.2196/28517

- 1  
2  
3 14 Haq IU, Rehman ZU. Medical Research in Pakistan; A Bibliometric Evaluation from 2001  
4 to 2020. *Libr Philos Pract (e-journal)*<https://www.pmc.gov.pk/> (accessed 9 Dec 2022).  
5  
6  
7  
8 15 THE 17 GOALS | Sustainable Development. <https://sdgs.un.org/goals> (accessed 5 Jul  
9 2023).  
10  
11  
12 16 Braun V, Clarke V. Thematic analysis. *APA Handb Res methods Psychol Vol 2 Res Des*  
13 *Quant Qual Neuropsychol Biol* 2012;:57–71. doi:10.1037/13620-004  
14  
15  
16  
17 17 Harrison K, Rahimi N, Danovaro-Holliday MC. Factors limiting data quality in the  
18 expanded programme on immunization in low and middle-income countries: A scoping  
19 review. *Vaccine* 2020;38:4652–63. doi:10.1016/j.vaccine.2020.02.091  
20  
21  
22  
23  
24 18 Tiffin N, George A, LeFevre AE. How to use relevant data for maximal benefit with  
25 minimal risk: digital health data governance to protect vulnerable populations in low-  
26 income and middle-income countries. *BMJ Glob Heal* 2019;4:e001395.  
27  
28  
29  
30  
31  
32  
33 19 Morgan R, Ayiasi RM, Barman D, *et al*. Gendered health systems: evidence from low-  
34 and middle-income countries. *Heal Res policy Syst* 2018;16:58. doi:10.1186/s12961-018-  
35 0338-5  
36  
37  
38  
39  
40 20 Theobald S, Morgan R, Hawkins K, *et al*. The importance of gender analysis in research  
41 for health systems strengthening. *Health Policy Plan*. 2017;32:v1–3.  
42  
43  
44  
45  
46  
47 21 Tannenbaum C, Ellis RP, Eyssel F, *et al*. Sex and gender analysis improves science and  
48 engineering. *Nature* 2019;575:137–46. doi:10.1038/s41586-019-1657-6  
49  
50  
51 22 More and Better Gender Data: A Powerful Tool for Improving Lives, The World Bank.  
52 2016.  
53  
54  
55  
56  
57  
58  
59  
60



- 1  
2  
3 23 International Organization for Standardization 26000, Guidance on social responsibility.  
4  
5 24 Artificial Intelligence and Start-Ups in Low- and Middle-Income Countries: Progress,  
6  
7 Promises and Perils. 2020.  
8  
9  
10 25 DeCorby-Watson K, Mensah G, Bergeron K, *et al.* Effectiveness of capacity building  
11  
12 interventions relevant to public health practice: a systematic review. *BMC Public Health*  
13  
14 2018;**18**:684. doi:10.1186/s12889-018-5591-6  
15  
16  
17 26 Bob Hayes. Machine Learning Adoption Rates Around the World. *Bus. Broadw.* 2021.  
18  
19 27 Hoodbhoy Z, Chunara R, Waljee A, *et al.* Is there a need for graduate-level programmes  
20  
21 in health data science? A perspective from Pakistan. *Lancet Glob Heal* 2023;**11**:e23–5.  
22  
23 doi:10.1016/S2214-109X(22)00459-4  
24  
25  
26 28 Bates DW, Saria S, Ohno-Machado L, *et al.* Big data in health care: using analytics to  
27  
28 identify and manage high-risk and high-cost patients. *Health Aff (Millwood)*  
29  
30 2014;**33**:1123–31. doi:10.1377/hlthaff.2014.0041  
31  
32  
33 29 Shaoibi A, Neelon B, Lenert LA. Shared Decision Making: From Decision Science to  
34  
35 Data Science. *Med Decis Mak an Int J Soc Med Decis Mak* 2020;**40**:254–65.  
36  
37 doi:10.1177/0272989X20903267  
38  
39  
40  
41  
42  
43  
44  
45  
46  
47  
48  
49  
50  
51  
52  
53  
54  
55  
56  
57  
58  
59  
60

1  
2  
3  
4  
5  
6  
7  
8  
9  
10  
11  
12  
13  
14  
15  
16  
17  
18  
19  
20  
21  
22  
23  
24  
25  
26  
27  
28  
29  
30  
31  
32  
33  
34  
35  
36  
37  
38  
39  
40  
41  
42  
43  
44  
45  
46  
47  
48  
49  
50  
51  
52  
53  
54  
55  
56  
57  
58  
59  
60



An overview of the methodological framework of the study – participant cohorts, process of interview preparation, conductance, and analysis

108x60mm (300 x 300 DPI)

## Semi-structured interview guide

### **Section 1 : Understanding the health data landscape for Pakistan**

#### **What type of health data exists in Pakistan?**

##### ***Potential prompts in case of a brief reply***

- What type of data at a national/regional/global level supports your decision-making ability/research work?
- What type of health data would further support your ability to make informed decisions?
- Is health data at a Pakistan level accessible?
- Is health data at a Pakistan level of good quality? (define quality)

### **Section 2: Understanding the application of a gender and equity lens to data**

#### ***Potential prompts in case of a brief reply (mostly guided by the interviewee's response)***

- Do we know how to apply a gender/equity lens to our data (disaggregation, analysis etc)
- What population group do you not frequently see available data about?

### **Section 3: Understanding the organizational handle on health data and its current role**

#### ***Potential prompts in case of a brief reply (mostly guided by the interviewee's response)***

- What health data does your organization hold and to what level does your organization engage with the data for decision making.
- How equipped are organizations to manage the health data they hold?
- What kind of infrastructure/software does your organization have? Is it sufficient?

### **Section 4: Understanding perceptions around developing a health data science training program/curriculum**

#### **How effective do you think the introduction of a health data science training curriculum will be, to address barriers?**

##### ***Potential prompts in case of a brief reply (mostly guided by the interviewee's response)***

- What type of training in data science would be most beneficial to you and why?
- What health data science curriculum/training programs exist and are useful?
- Do you think there's an existing need for development of such a program in Pakistan? Why or why not?
- What barriers should such a training program address?
- What components should the health data science training curriculum have?

1  
2  
3  
4  
5  
6  
7  
8  
9  
10  
11  
12  
13  
14  
15  
16  
17  
18  
19  
20  
21  
22  
23  
24  
25  
26  
27  
28  
29  
30  
31  
32  
33  
34  
35  
36  
37  
38  
39  
40  
41  
42  
43  
44  
45  
46  
47

### Consolidated criteria for reporting qualitative studies (COREQ): 32-item checklist

| No. Item                                       | Guide questions/description                                                                                                                 | Reported on Page # |
|------------------------------------------------|---------------------------------------------------------------------------------------------------------------------------------------------|--------------------|
| <b>Domain 1: Research team and reflexivity</b> |                                                                                                                                             |                    |
| <i>Personal Characteristics</i>                |                                                                                                                                             |                    |
| 1. Inter viewer/facilitator                    | Which author/s conducted the interview or focus group?                                                                                      | 7                  |
| 2. Credentials                                 | What were the researcher's credentials? E.g., PhD, MD                                                                                       | 8                  |
| 3. Occupation                                  | What was their occupation at the time of the study?                                                                                         | 8                  |
| 4. Gender                                      | Was the researcher male or female?                                                                                                          | 7                  |
| 5. Experience and training                     | What experience or training did the researcher have?                                                                                        | 8                  |
| <i>Relationship with participants</i>          |                                                                                                                                             |                    |
| 6. Relationship established                    | There was no personal relationship between interviewers                                                                                     | N/A                |
| 7. Participant knowledge of the interviewer    | What did the participants know about the researcher? e.g., personal goals, reasons for doing the research                                   | N/A                |
| 8. Interviewer characteristics                 | What characteristics were reported about the inter viewer/facilitator? e.g., Bias, assumptions, reasons and interests in the research topic | N/A                |
| <b>Domain 2: study design</b>                  |                                                                                                                                             |                    |
| <i>Theoretical framework</i>                   |                                                                                                                                             |                    |

|                                          |                                                                                                                                                           |     |
|------------------------------------------|-----------------------------------------------------------------------------------------------------------------------------------------------------------|-----|
|                                          |                                                                                                                                                           |     |
| 9. Methodological orientation and Theory | What methodological orientation was stated to underpin the study? e.g., grounded theory, discourse analysis, ethnography, phenomenology, content analysis | 9   |
| <i>Participant selection</i>             |                                                                                                                                                           |     |
| 10. Sampling                             | How were participants selected? e.g., purposive, convenience, consecutive, snowball                                                                       | 8   |
| 11. Method of approach                   | How were participants approached? e.g., face-to-face, telephone, mail, email                                                                              | 8   |
| 12. Sample size                          | How many participants were in the study?                                                                                                                  | 10  |
| 13. Non-participation                    | How many people refused to participate or dropped out? Reasons?                                                                                           | N/A |
| <i>Setting</i>                           |                                                                                                                                                           |     |
| 14. Setting of data collection           | Where was the data collected? e.g., home, clinic, workplace                                                                                               | 8   |
| 15. Presence of non-participants         | Was anyone else present besides the participants and researchers?                                                                                         | 8   |
| 16. Description of sample                | What are the important characteristics of the sample? e.g., demographic data, date                                                                        | 10  |
| <i>Data collection</i>                   |                                                                                                                                                           |     |
| 17. Interview guide                      | Were questions, prompts, guides provided by the authors? Was it pilot tested?                                                                             | 7   |
| 18. Repeat interviews                    | Were repeat inter views carried out? If yes, how many?                                                                                                    | N/A |
| 19. Audio/visual recording               | Did the research use audio or visual recording to collect the data?                                                                                       | 9   |

|                                        |                                                                                                                                     |       |
|----------------------------------------|-------------------------------------------------------------------------------------------------------------------------------------|-------|
| 20. Field notes                        | Were field notes made during and/or after the interview or focus group?                                                             | N/A   |
| 21. Duration                           | What was the duration of the inter views or focus group?                                                                            | 8     |
| 22. Data saturation                    | Was data saturation discussed?                                                                                                      | 8     |
| 23. Transcripts returned               | Were transcripts returned to participants for comment and/or correction?                                                            | N/A   |
| <b>Domain 3: analysis and findings</b> |                                                                                                                                     |       |
| <i>Data analysis</i>                   |                                                                                                                                     |       |
| 24. Number of data coders              | How many data coders coded the data?                                                                                                | 9     |
| 25. Description of the coding tree     | Did authors provide a description of the coding tree?                                                                               | N/A   |
| 26. Derivation of themes               | Were themes identified in advance or derived from the data?                                                                         | 9     |
| 27. Software                           | What software, if applicable, was used to manage the data?                                                                          | 9     |
| 28. Participant checking               | Did participants provide feedback on the findings?                                                                                  | N/A   |
| <i>Reporting</i>                       |                                                                                                                                     |       |
| 29. Quotations presented               | Were participant quotations presented to illustrate the themes/findings?<br>Was each quotation identified? e.g., participant number | 11-17 |
| 30. Data and findings consistent       | Was there consistency between the data presented and the findings?                                                                  | 10-17 |
| 31. Clarity of major themes            | Were major themes clearly presented in the findings?                                                                                | 10-17 |
| 32. Clarity of minor themes            | Is there a description of diverse cases or discussion of minor themes?                                                              | N/A   |

1  
2  
3  
4  
5  
6  
7  
8  
9  
10  
11  
12  
13  
14  
15  
16  
17  
18  
19  
20  
21  
22  
23  
24  
25  
26  
27  
28  
29  
30  
31  
32  
33  
34  
35  
36  
37  
38  
39  
40  
41  
42  
43  
44  
45  
46  
47

For peer review only
